# Supplementary material
Source: publisher figshare collection journal article supplement (https://gsajournals.figshare.com/articles/dataset/_/7484492)

# SGA Preqc Results : fig1

Est. Genome Size

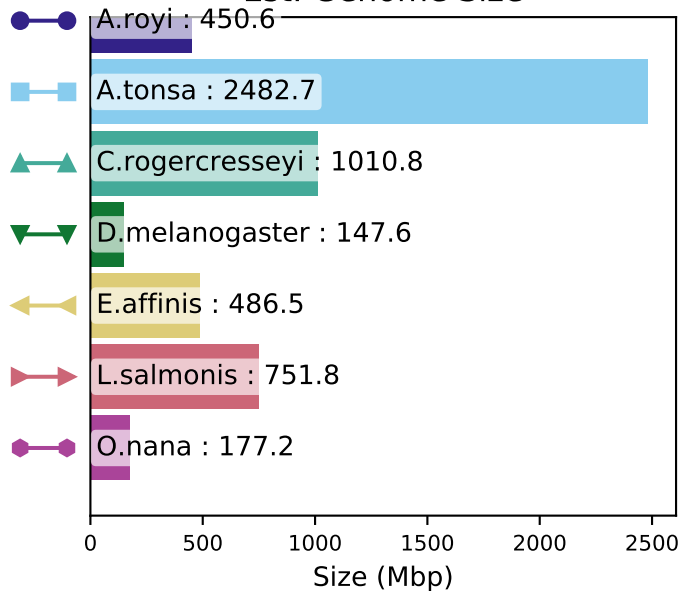

variant branches in k-de Bruijn graph

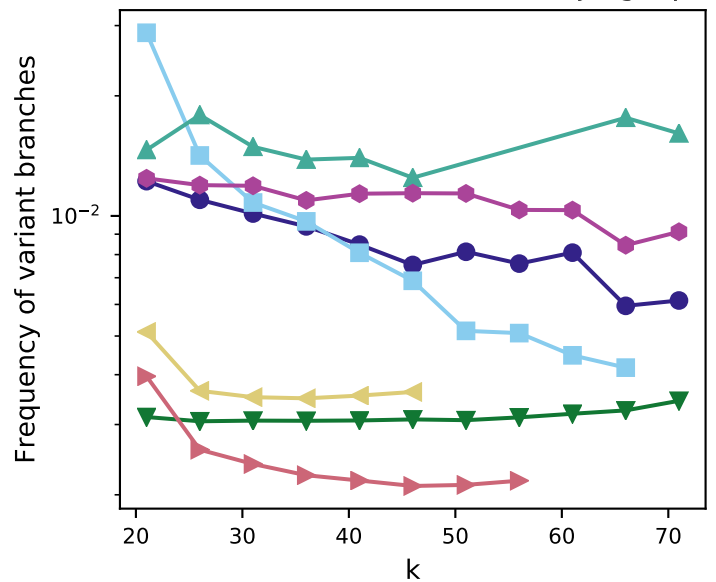

Simulated contig lengths vs k

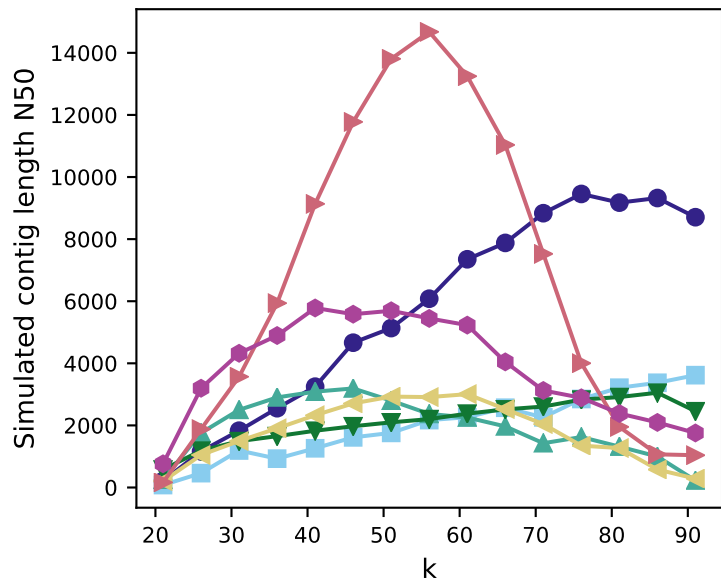

repeat branches in k-de Bruijn graph

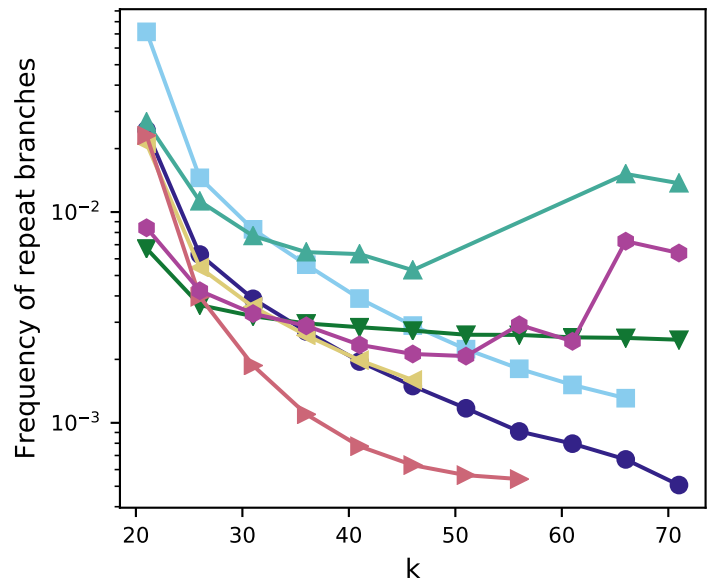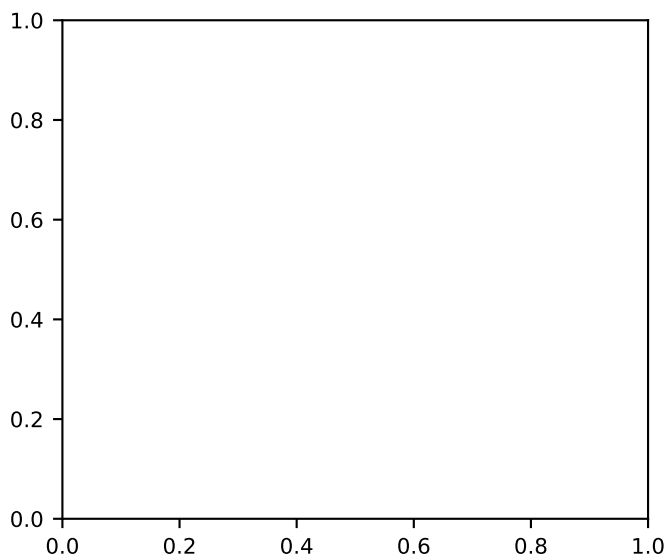

error branches in k-de Bruijn graph

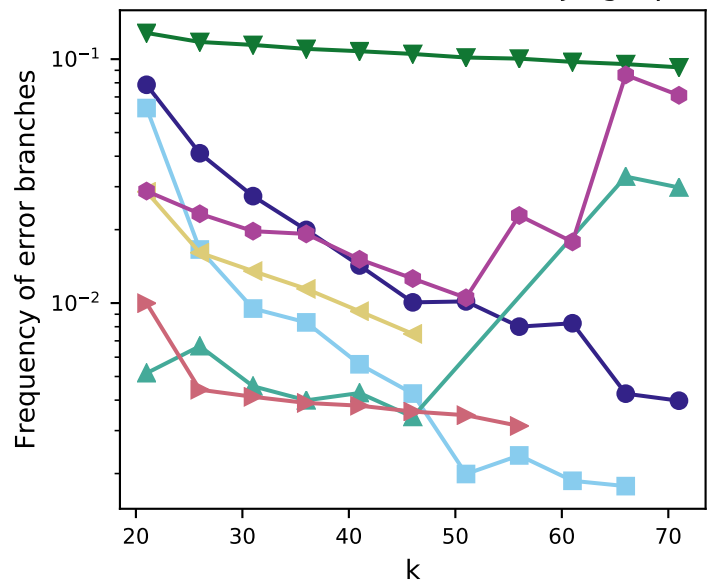

## SGA Preqc Results : fig2

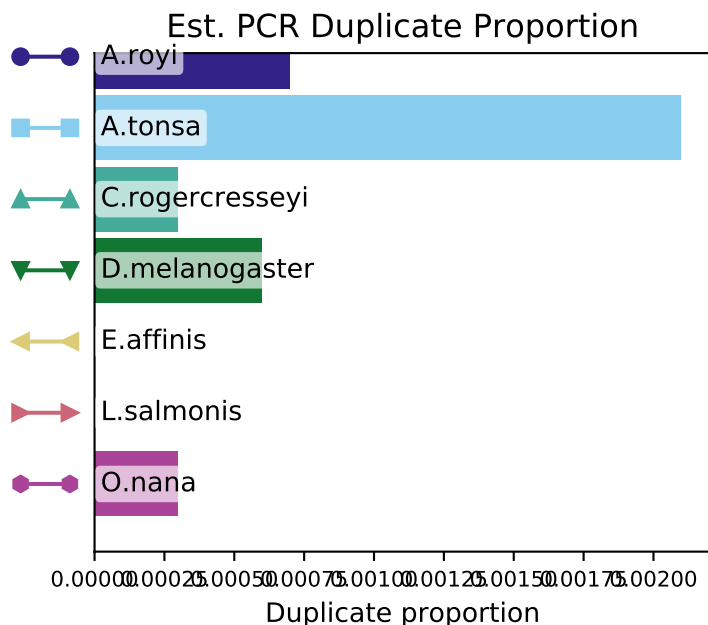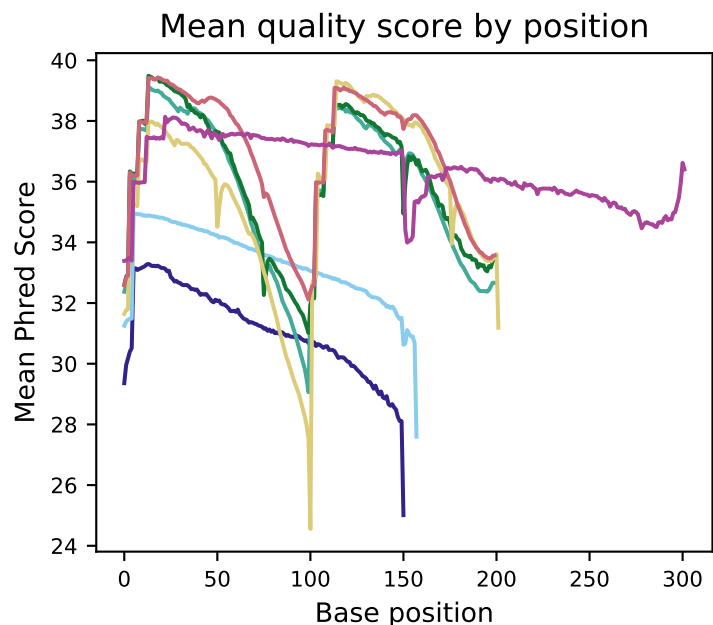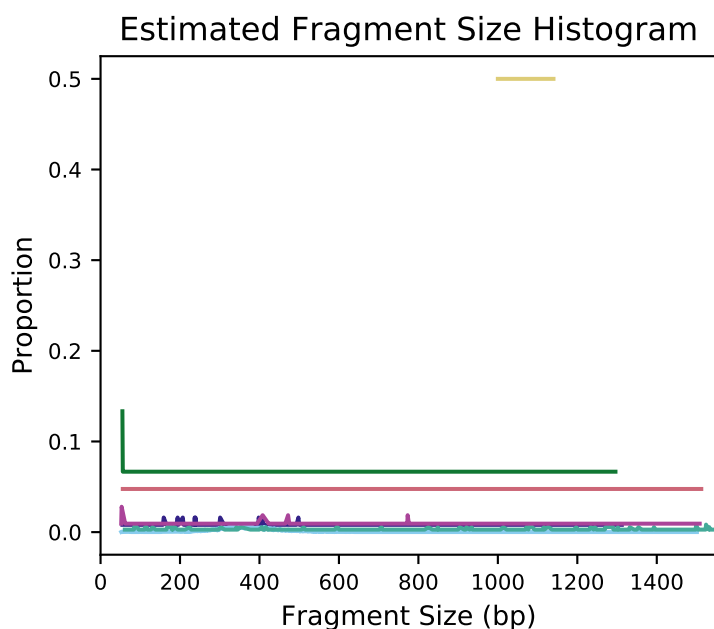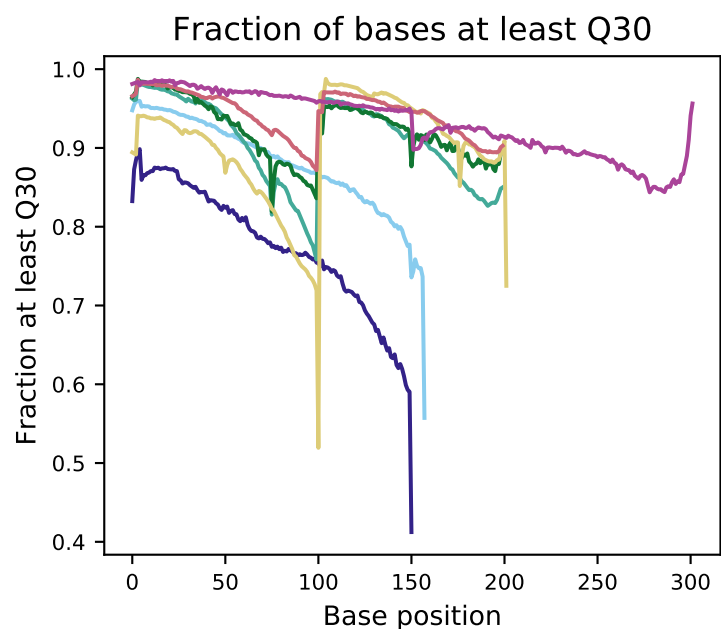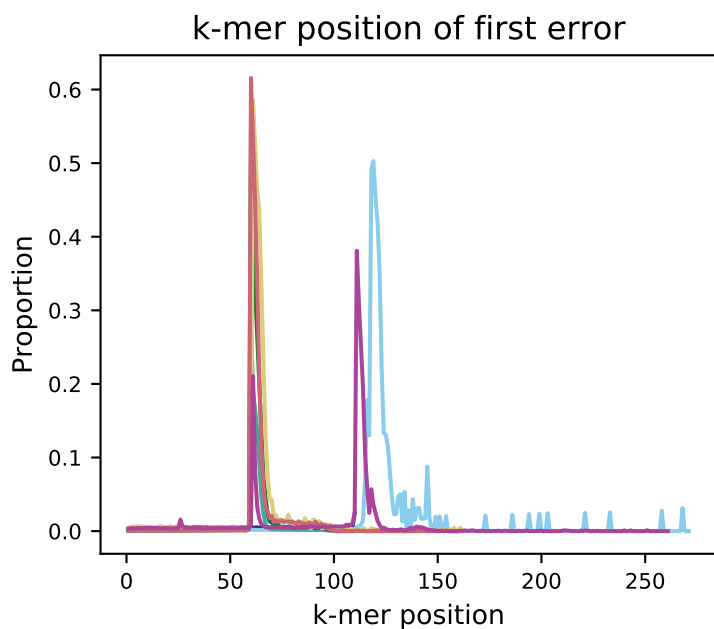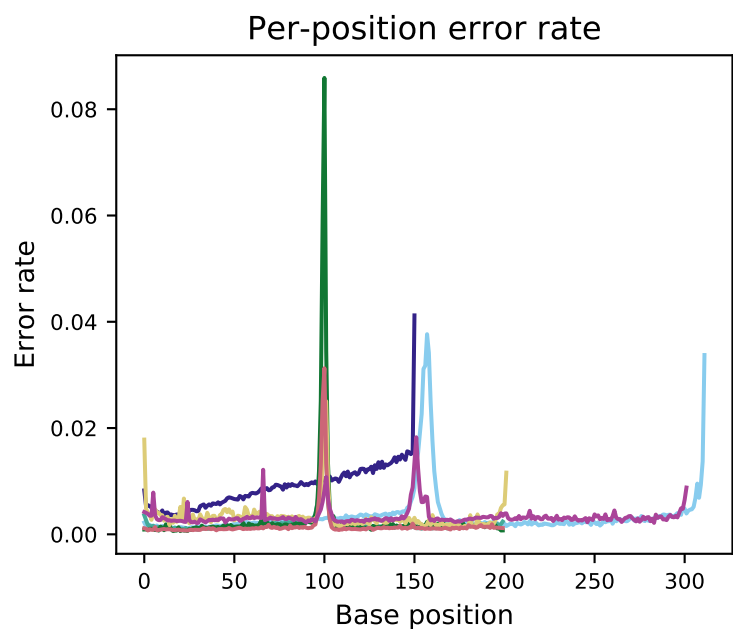

# SGA Preqc Results : fig3

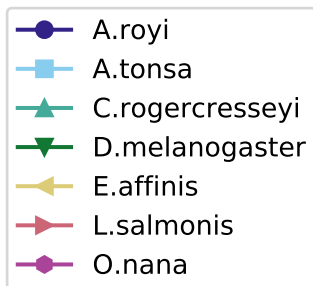

## A.royi GC Bias

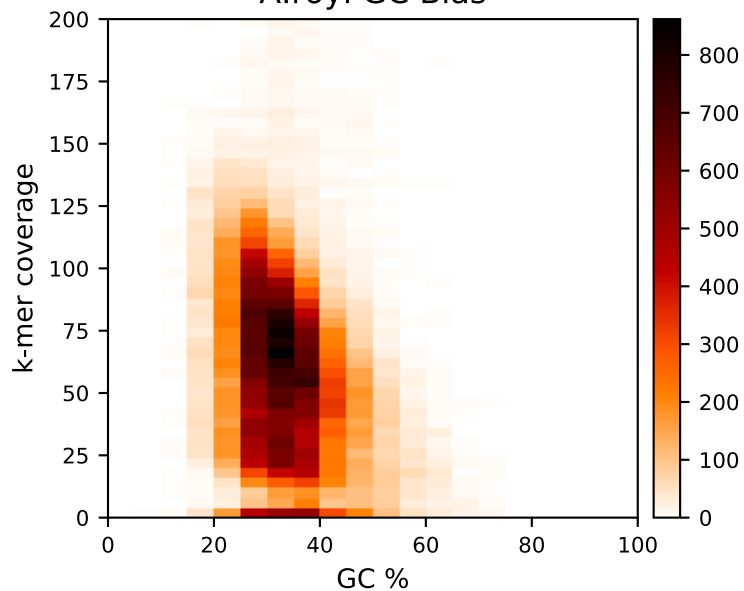

## 51-mer count distribution

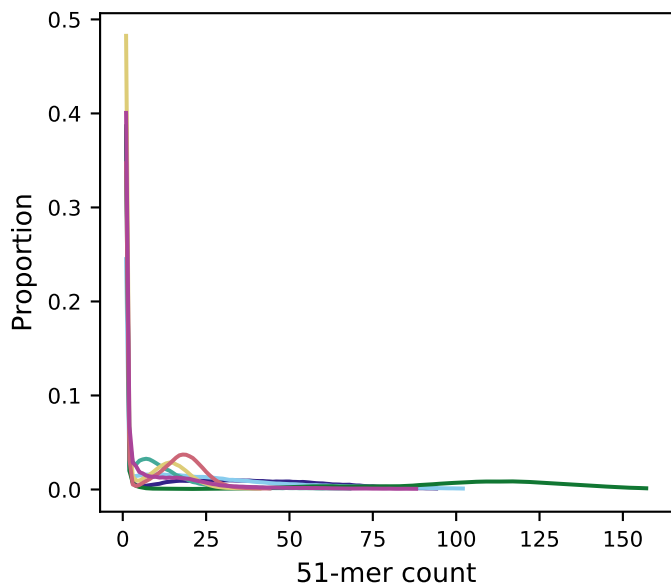

## A.tonsa GC Bias

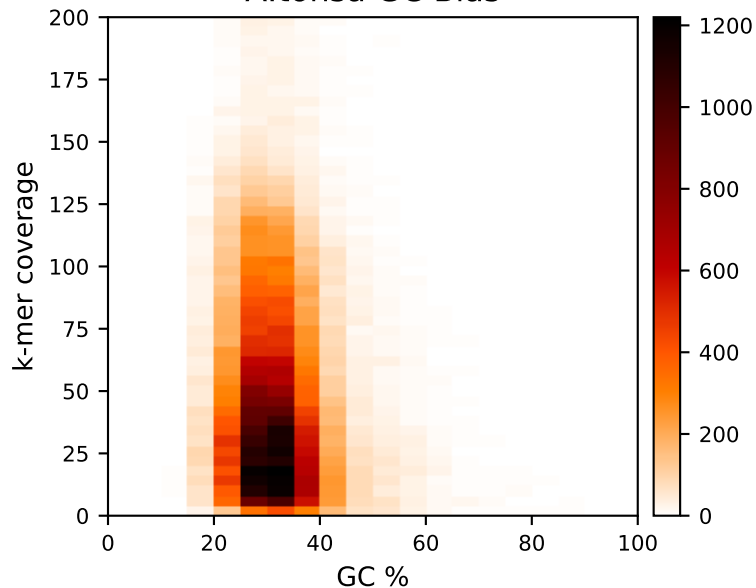

## C.rogercresseyi GC Bias

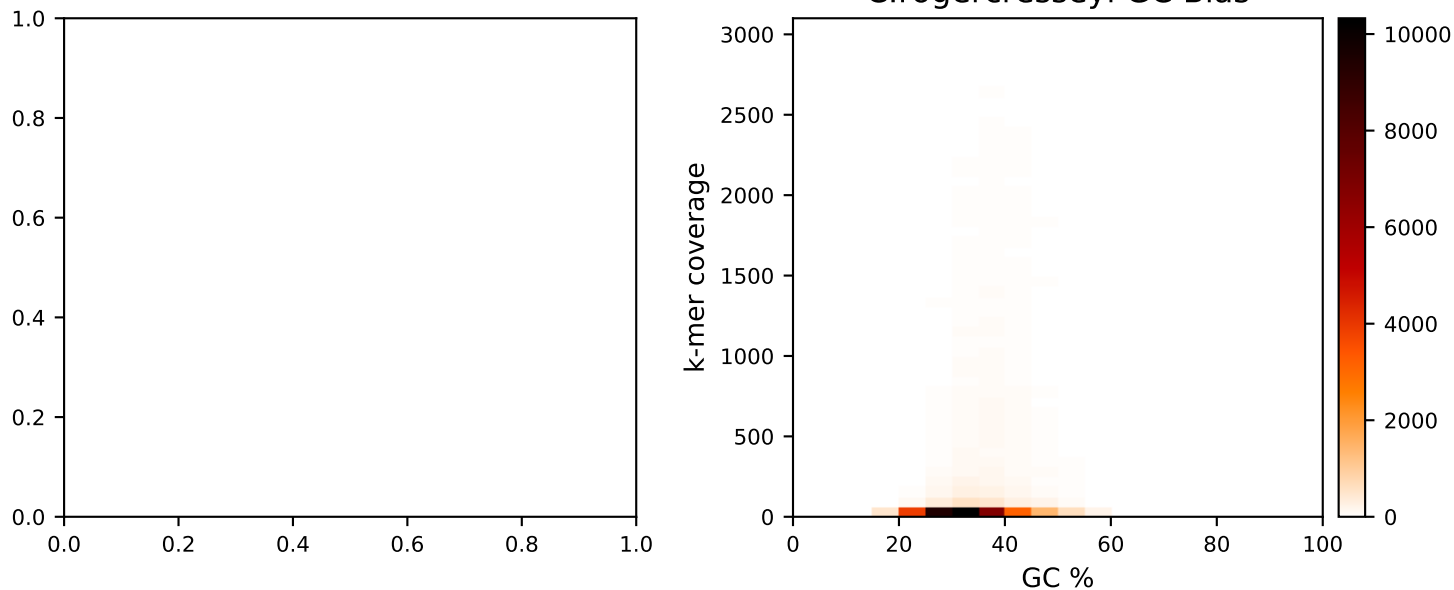

# SGA Preqc Results : fig4

D.melanogaster GC Bias

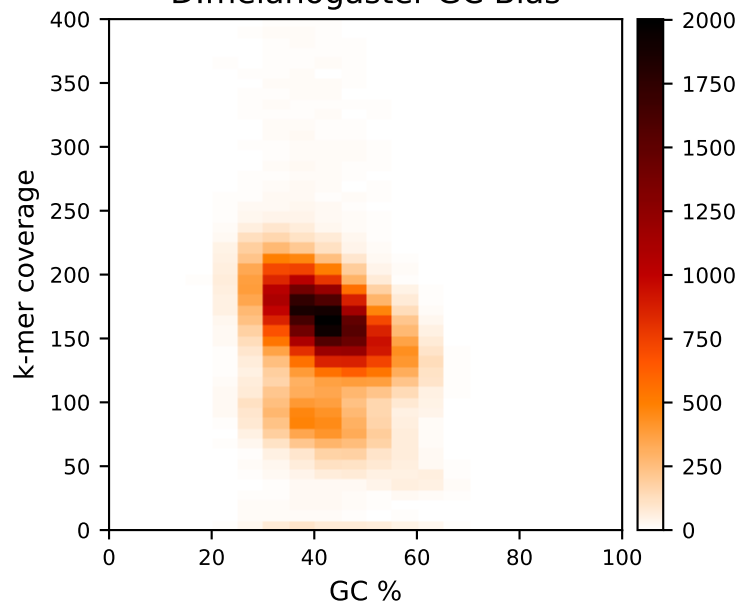

E.affinis GC Bias

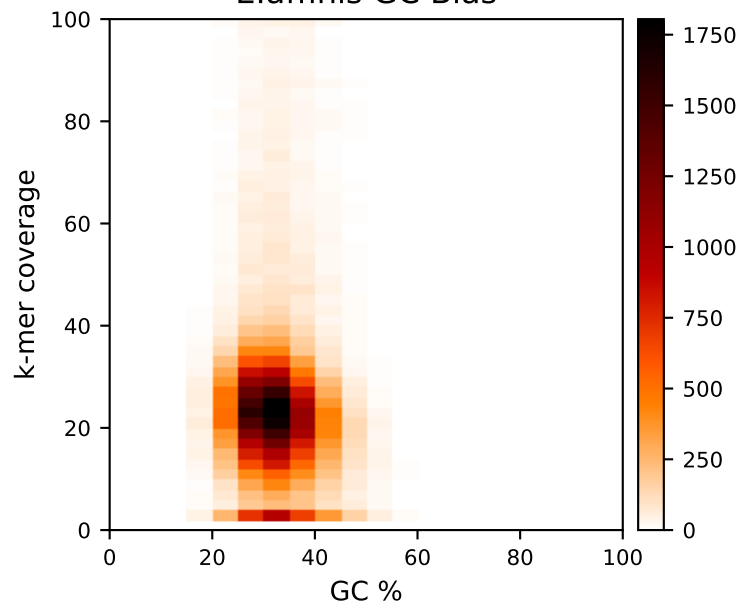

L.salmonis GC Bias

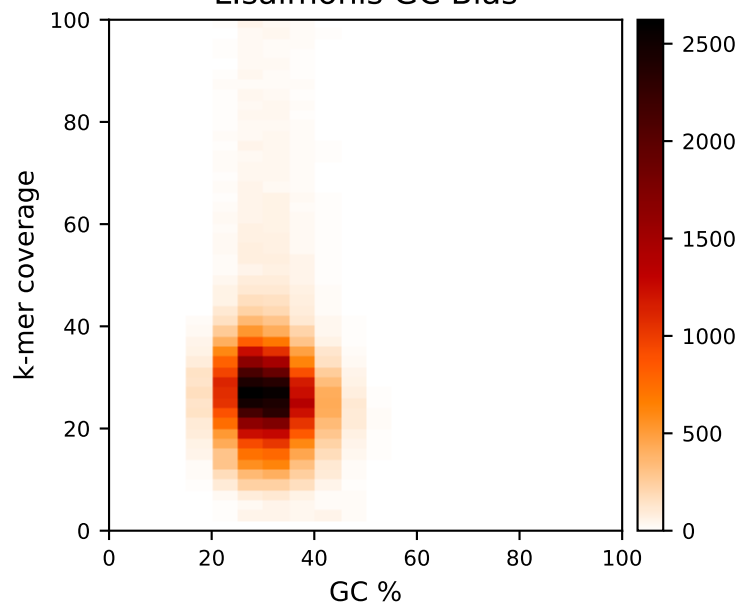

O.nana GC Bias

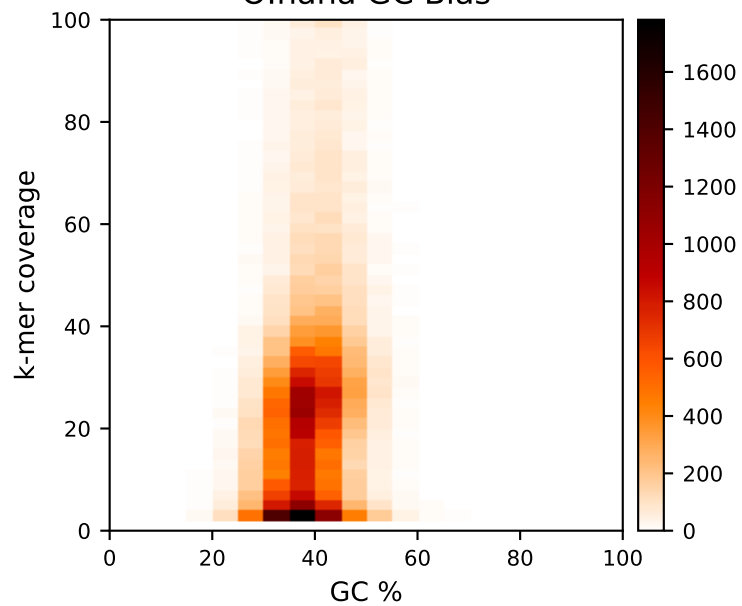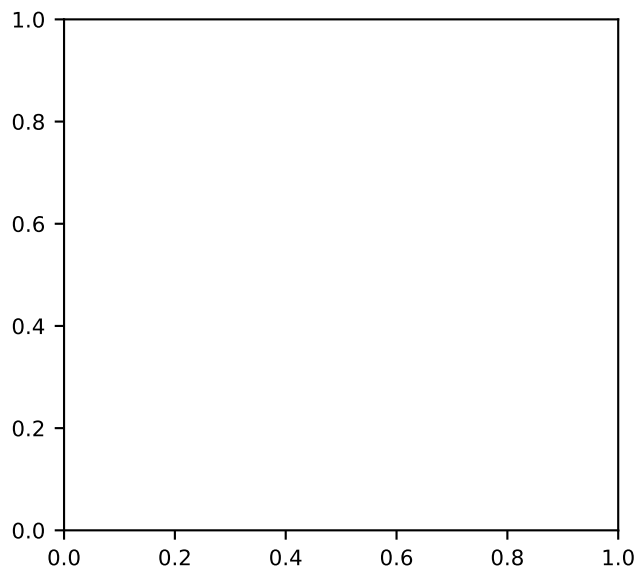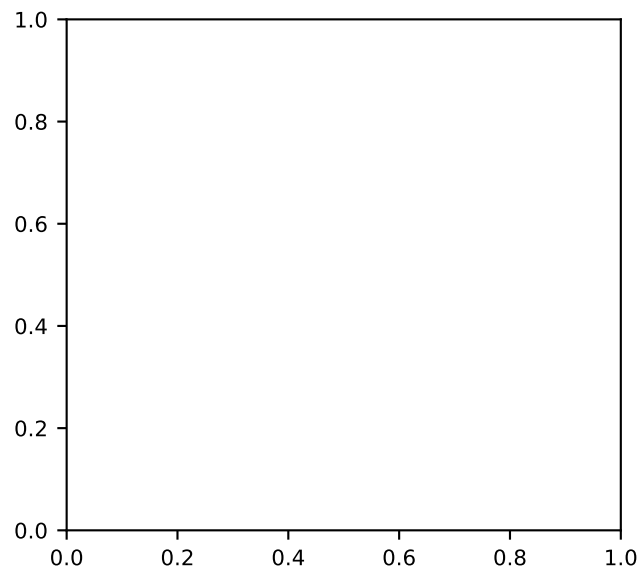

Supplement: Supplementary file 1 [file 1]
