# Supplementary material
Source: publisher figshare collection journal article supplement (https://gsajournals.figshare.com/articles/dataset/_/7484492)
Supplement: Supplementary file 1 [file 1]

## Sheet: L_RNA_scaffolder.1kb.fasta.noco
name	length	GC%	coverage
scaffold_16301	114454	34.05	126
scaffold_12003	113424	34.37	126
scaffold_17721	100464	34.57	121
scaffold_14175	95400	35.69	121
scaffold_2577	94046	31.21	143
scaffold_1570	85564	35.18	123
scaffold_8627	81504	33.67	123
scaffold_9116	76759	34.19	126
scaffold_7935	75502	33.41	130
scaffold_3385	74815	37.09	117
scaffold_11989	72845	32.12	144
scaffold_3030	70612	31.83	139
scaffold_6954	70100	34.74	125
scaffold_12015	69404	33.24	129
scaffold_2322	69260	38.34	60
scaffold_3212	65433	36.66	115
scaffold_304	65088	36.2	112
scaffold_11685	62910	35.94	121
scaffold_7336	62171	35.39	125
scaffold_13258	61620	35.05	131
scaffold_3416	60935	31.75	137
scaffold_11515	60859	32.23	144
scaffold_16773	59722	37.2	111
scaffold_5683	59004	35.56	117
scaffold_1195	57888	34.36	126
scaffold_749	57551	32.26	132
scaffold_18513	56091	34.65	122
scaffold_8185	55330	34.98	125
scaffold_5746	53877	32.86	138
scaffold_15830	53728	34.97	121
scaffold_15668	51985	36.63	111
scaffold_16760	50669	36.53	117
scaffold_12618	49495	38.38	108
scaffold_1110	49264	32.28	131
scaffold_11308	49183	32.17	136
scaffold_7377	48476	32.29	124
scaffold_7473	48425	34.43	127
scaffold_12111	48239	37.96	116
scaffold_14696	48100	35.82	112
scaffold_15982	48058	36.83	112
scaffold_4383	47470	35.14	119
scaffold_17648	47326	32.27	137
scaffold_12521	47295	33.39	122
scaffold_8494	47284	33.91	128
scaffold_10197	47149	35.45	120
scaffold_8594	46876	33.73	128
scaffold_7573	46794	34.89	126
scaffold_17593	46160	37.6	110
scaffold_13048	45960	34.58	118
scaffold_17201	45215	33.29	131
scaffold_2146	44733	35.07	120
scaffold_873	44722	34.86	127
scaffold_16754	44266	35.16	127
scaffold_14421	44189	35.96	122
scaffold_1905	43951	34.31	124
scaffold_12651	43942	36.23	115
scaffold_2475	43622	37.24	60
scaffold_5717	42778	33.2	97
scaffold_13756	42748	32.24	137
scaffold_6589	42145	34.95	116
scaffold_4890	41864	34.54	127
scaffold_7535	41761	32.63	125
scaffold_6938	41386	35	106
scaffold_14378	41199	33.44	126
scaffold_7213	41156	34.43	125
scaffold_1898	40847	33.95	129
scaffold_12119	40738	36.33	111
scaffold_7218	40358	35.08	118
scaffold_7341	40127	35.87	115
scaffold_16666	40025	35.42	119
scaffold_7136	39276	34.95	122
scaffold_170	39163	32.75	113
scaffold_13490	39132	31.93	142
scaffold_1493	38907	36.79	114
scaffold_14126	38807	35.4	113
scaffold_7452	38593	35.91	107
scaffold_541	38417	39.2	93
scaffold_15170	38315	36.28	109
scaffold_9958	38042	31.59	140
scaffold_14390	37938	35.23	128
scaffold_13295	37759	36.51	107
scaffold_17623	37567	31.59	134
scaffold_6361	37391	32.25	134
scaffold_12624	37285	34.76	128
scaffold_14805	37178	35.13	115
scaffold_8304	36803	34.84	124
scaffold_3355	36751	36.3	119
scaffold_4711	36666	34.25	127
scaffold_12381	36610	36.27	116
scaffold_997	36584	39.23	104
scaffold_16786	36225	33	128
scaffold_10063	36080	34.6	118
scaffold_6798	36051	33.96	127
NODE_26_length_35454_cov_31.851740	35444	31.97	77
scaffold_15530	35409	34.81	117
scaffold_12391	34834	33.47	123
scaffold_5913	34820	34.33	124
scaffold_3911	34655	35.83	113
scaffold_9679	34502	34.13	130
scaffold_150	34474	32.11	131
scaffold_4220	34283	36.39	112
scaffold_14797	34045	32.08	128
scaffold_2177	34020	35.21	116
scaffold_3235	34008	38.24	111
scaffold_969	33699	38.61	103
scaffold_2800	33391	30.83	144
scaffold_11002	32854	32.83	97
scaffold_17810	32611	34.68	120
scaffold_5722	32590	34.01	127
scaffold_9682	32522	38.61	104
scaffold_1590	32411	33.83	129
scaffold_7754	32168	35.92	113
scaffold_9771	32098	33.35	129
scaffold_17425	32090	35.22	113
scaffold_14681	32086	36.14	117
scaffold_14741	31793	34.27	99
scaffold_1178	31760	31.62	146
scaffold_4470	31637	32.4	129
scaffold_13964	31536	36.38	113
scaffold_18038	31409	33.42	122
scaffold_16667	31341	37.12	113
scaffold_8129	31314	34.7	119
scaffold_1890	31270	31.89	140
scaffold_16689	31080	33.45	139
scaffold_6971	30903	34.17	129
scaffold_6403	30665	33.13	124
scaffold_16997	30438	34.32	126
scaffold_10116	30275	34.94	112
scaffold_11953	29846	33.73	129
scaffold_8798	29748	37.24	109
scaffold_5940	29563	34.24	125
scaffold_3449	29538	35.09	132
scaffold_7592	29394	36.79	106
scaffold_451	29212	38.98	103
scaffold_3572	29172	37.48	108
scaffold_13694	29163	32.27	138
scaffold_16184	29149	36.85	109
scaffold_14003	29083	33.43	124
scaffold_16888	29053	35.62	153
scaffold_2693	28963	30.19	129
scaffold_12389	28700	38.02	107
scaffold_16308	28671	31.42	145
scaffold_8807	28670	38.22	110
scaffold_17566	28575	34.06	121
NODE_48_length_28476_cov_55.858385	28470	34.29	129
scaffold_10468	28356	33.48	129
scaffold_4887	28307	31.42	102
scaffold_1300	28226	31.11	138
scaffold_5769	28205	31.35	90
scaffold_14995	28203	37.79	109
scaffold_12112	28165	32.24	140
scaffold_10165	28156	38.18	111
scaffold_8662	28103	32.05	133
NODE_52_length_28088_cov_46.630859	28088	37.64	109
scaffold_18319	27965	38.02	104
scaffold_13938	27927	37.09	107
scaffold_5090	27707	38.07	108
scaffold_3833	27684	38.84	111
scaffold_216	27669	33.22	88
NODE_53_length_27914_cov_49.145095	27610	35.69	117
scaffold_17114	27322	40.23	97
scaffold_2913	27193	39.28	104
scaffold_15291	27176	34.52	76
scaffold_13125	27099	31.01	144
scaffold_9164	27004	35.61	119
scaffold_10243	26998	32.15	133
scaffold_11194	26998	33.12	124
scaffold_16218	26943	31.95	89
scaffold_17657	26895	37.67	123
scaffold_15803	26851	37.71	107
scaffold_8278	26831	33.51	126
scaffold_10151	26775	36	115
scaffold_596	26751	38.43	109
NODE_63_length_26943_cov_50.464602	26736	34.05	127
scaffold_6602	26695	33.9	130
NODE_66_length_26644_cov_54.032258	26634	31.71	140
NODE_62_length_26990_cov_46.334560	26605	38.46	109
scaffold_18749	26567	32.87	128
scaffold_12030	26544	36.54	121
scaffold_4805	26494	37.79	111
NODE_69_length_26436_cov_34.849577	26436	32.51	73
scaffold_7911	26413	37.1	108
NODE_68_length_26488_cov_39.797168	26389	38.71	111
scaffold_13028	26374	35.09	122
scaffold_10870	26221	35.31	120
scaffold_14842	26206	33.57	128
scaffold_12168	26153	36.43	117
scaffold_1501	26070	33.97	124
NODE_72_length_26188_cov_49.977136	25981	34.76	128
scaffold_12285	25966	36.72	115
NODE_74_length_26091_cov_53.467287	25896	32.47	137
scaffold_11495	25802	35.16	122
scaffold_15204	25780	33.22	125
scaffold_3654	25689	33.86	119
NODE_73_length_26158_cov_44.486043	25571	36.15	119
scaffold_3880	25534	34.12	129
scaffold_9918	25516	35.89	111
scaffold_4360	25491	37.54	108
scaffold_17451	25440	33.07	119
scaffold_13853	25377	33.1	134
scaffold_1527	25352	34.29	127
scaffold_17513	25349	36.17	121
scaffold_12106	25309	32.7	130
scaffold_1386	25303	33.44	124
NODE_80_length_25299_cov_44.753231	25299	32.26	98
scaffold_17594	25231	33.63	93
scaffold_12018	25210	36.62	111.5
scaffold_4012	25193	35.76	122
scaffold_12035	25162	30.95	82
scaffold_17331	25128	37.06	116
scaffold_9409	25125	32.45	116
NODE_79_length_25313_cov_58.984586	25120	37.5	112
NODE_87_length_25041_cov_21.307363	25041	33.6	46
scaffold_5464	25022	33.81	127
scaffold_16549	24973	40.1	99
scaffold_7015	24959	34.18	132
NODE_82_length_25197_cov_56.765106	24916	32.45	139
scaffold_8641	24813	35.34	116
scaffold_13611	24806	34.49	118
scaffold_13577	24800	34.45	114
scaffold_11367	24783	36.35	108
scaffold_17306	24782	33.13	126
scaffold_16659	24776	37.55	108
scaffold_7196	24635	34.04	123
NODE_91_length_24832_cov_56.344779	24635	32.03	130
scaffold_9911	24590	36.23	126
scaffold_917	24557	35.02	127
scaffold_13108	24541	36.33	114
scaffold_1297	24405	34.33	127
NODE_94_length_24466_cov_55.539770	24368	31.42	146
scaffold_10978	24359	31.16	145
scaffold_11160	24349	38.9	77
scaffold_10253	24341	32.69	77
scaffold_2593	24289	34.31	127
scaffold_7215	24257	34.86	118
scaffold_6643	24190	35.51	114
scaffold_18461	24135	32.87	81
scaffold_5583	24120	34.61	124
NODE_100_length_24212_cov_46.231490	24114	38.21	108
scaffold_10115	24082	33.73	82
scaffold_12313	24062	37.06	100
scaffold_17125	24001	34.48	122
scaffold_3138	23999	32.38	140
scaffold_15331	23953	38.52	107
scaffold_6525	23932	32.19	137
NODE_102_length_24023_cov_45.750230	23927	35.71	115
scaffold_6974	23911	36.38	119
NODE_98_length_24270_cov_49.342659	23885	31.93	135
scaffold_10343	23820	36.33	114
scaffold_9222	23790	35.76	123
scaffold_8745	23779	38.98	113
scaffold_1888	23767	34.26	105
scaffold_925	23745	32.36	47
scaffold_5781	23744	33.81	125
scaffold_2553	23676	35.33	122
scaffold_3990	23672	36.45	109
NODE_106_length_23650_cov_14.333432	23650	32.71	31
scaffold_9276	23645	36.66	115
scaffold_5690	23639	35.01	123
scaffold_6987	23627	34.88	117
scaffold_4704	23614	34.91	122
NODE_104_length_23699_cov_31.936246	23604	31.63	70
scaffold_15887	23595	33.07	93
scaffold_15461	23552	36.08	116
scaffold_15141	23544	33.23	130
NODE_103_length_23718_cov_65.007191	23523	35.76	114
scaffold_1319	23468	33.07	131
NODE_110_length_23438_cov_54.057189	23438	36.99	113
scaffold_10422	23434	32.27	108
scaffold_18241	23417	37.06	99
NODE_108_length_23603_cov_56.454093	23410	32.13	142
scaffold_4692	23390	33.39	134
scaffold_3009	23388	38.79	100
scaffold_12702	23367	32.84	132
scaffold_481	23332	38.71	116
scaffold_16993	23299	36.7	104
scaffold_15362	23298	32.64	104
scaffold_6569	23283	32.99	76
scaffold_15234	23269	34.69	100
scaffold_18523	23207	37.76	113
scaffold_6491	23193	36.35	105
scaffold_1955	23180	31.68	126
scaffold_9933	23174	38.6	100
scaffold_2164	23167	32.14	109
scaffold_685	23123	35.49	108
scaffold_14341	23100	33.29	140
NODE_112_length_23173_cov_54.919120	23076	31.71	138
scaffold_9881	23052	37.1	114
scaffold_15623	23043	37.24	112
scaffold_4469	23037	35.52	122
scaffold_8597	23021	36.75	119
scaffold_11699	22999	34.7	121
scaffold_10704	22955	34.15	128
scaffold_15298	22953	32.23	137
scaffold_12032	22925	33.21	90
scaffold_12589	22915	36.36	124
scaffold_18685	22883	33.46	130
scaffold_13315	22820	35.1	112
scaffold_2794	22675	33.25	121
scaffold_6448	22647	37.29	113
scaffold_12437	22636	36.16	108
scaffold_1683	22608	37.19	118
scaffold_14525	22580	36.1	116
scaffold_17890	22481	36.3	93
scaffold_11363	22448	32.64	126
scaffold_8084	22390	34.22	117
scaffold_13768	22328	40.08	95
NODE_118_length_22589_cov_60.252976	22294	30.2	151
scaffold_269	22292	32.81	136
scaffold_5936	22275	36.58	116
NODE_116_length_22722_cov_58.620888	22220	30.23	148
NODE_120_length_22220_cov_54.438107	22210	33.12	144
scaffold_12075	22208	35.78	120
scaffold_6883	22157	36.21	120
scaffold_9836	22104	35.06	115
scaffold_7761	22095	31.02	98
scaffold_9677	21959	35.47	115
NODE_119_length_22417_cov_47.071441	21936	38.43	108
scaffold_6747	21923	37.11	110
scaffold_4857	21893	33.28	138
scaffold_16538	21879	37.49	58
scaffold_1156	21866	36.23	106
scaffold_12879	21828	36.15	113
scaffold_7628	21748	39.17	102
NODE_125_length_21980_cov_50.332831	21688	34.19	123
scaffold_6020	21687	36.04	122
scaffold_3830	21653	33.07	133
scaffold_810	21567	34.08	72
scaffold_12771	21553	32.76	130
scaffold_9556	21552	33.28	116
scaffold_17347	21531	29.76	157
NODE_128_length_21515_cov_49.807628	21515	36.75	111
scaffold_11199	21463	34.48	127
scaffold_3720	21454	38.1	109
scaffold_127	21453	34.7	124
scaffold_4121	21396	33.25	73
scaffold_16753	21368	35.21	116
scaffold_6558	21341	31.74	101
scaffold_13439	21337	33.78	123
scaffold_2668	21327	36.09	111
NODE_124_length_21989_cov_52.794770	21314	32.21	123
scaffold_11729	21272	38.44	99
NODE_132_length_21263_cov_56.217691	21263	32.03	144
scaffold_641	21248	34.04	122
scaffold_9964	21234	39.3	96
scaffold_2174	21221	34.63	119
scaffold_4441	21209	34.24	124
scaffold_14492	21207	41.1	88
scaffold_11069	21198	34.31	121
scaffold_13697	21189	37.48	106
scaffold_4856	21159	35.04	129
scaffold_7604	21153	34.66	120
scaffold_10204	21143	33.16	120
scaffold_15964	21140	36.23	115
scaffold_8580	21132	32.22	114
scaffold_7352	21123	35.17	116
scaffold_3924	21104	34.87	124
scaffold_10684	21085	33.13	111
NODE_135_length_21077_cov_58.310190	21077	32.22	145
scaffold_1836	21066	41.92	89
scaffold_12831	21024	31.32	142
scaffold_404	21023	35.88	108
scaffold_2279	21010	34.16	123
scaffold_13037	21008	38.07	107
scaffold_11437	20960	36.96	101
scaffold_16456	20951	35.48	123
scaffold_15043	20927	33.64	100
NODE_140_length_20879_cov_55.054698	20879	32.82	135
scaffold_8851	20870	32.19	133
scaffold_15401	20839	31.46	94
scaffold_11779	20775	33.28	95
scaffold_17780	20738	34.37	110
NODE_144_length_20728_cov_45.555469	20728	38.58	104
scaffold_13042	20721	38.13	95
scaffold_17608	20675	37.53	108
scaffold_6646	20586	32.31	113
scaffold_1152	20582	35.07	118
scaffold_6808	20563	32.85	135
scaffold_2348	20540	34.41	124
scaffold_750	20500	38.66	100
NODE_147_length_20663_cov_51.389215	20471	34.43	130
NODE_153_length_20459_cov_22.036650	20459	32.48	48
scaffold_4588	20415	32.6	129
scaffold_11531	20400	35.47	117
scaffold_4545	20374	32.52	132
scaffold_14246	20353	34.77	114
scaffold_10279	20346	35.48	116
scaffold_15691	20341	31.63	138
NODE_154_length_20340_cov_24.453612	20339	35.38	63
scaffold_17386	20326	34.95	124
scaffold_556	20318	38.83	104
scaffold_1591	20270	39.65	95
scaffold_692	20256	34.3	119
scaffold_18332	20203	36.23	107
scaffold_2866	20151	33.76	124
scaffold_4308	20150	35.43	118
scaffold_14715	20146	38.64	106
scaffold_12421	20137	38.86	105
scaffold_10230	20114	32.47	77
scaffold_8408	20108	33.77	118
scaffold_4475	20086	37.94	106
scaffold_9383	20030	34.58	101
NODE_159_length_20029_cov_12.374386	20019	40.21	36
scaffold_2407	20018	37.71	103
scaffold_2630	20015	34.11	122
scaffold_1672	20010	33.64	103
scaffold_5343	20010	32.64	128
NODE_162_length_19971_cov_72.435257	19971	34.84	123
scaffold_17202	19956	34.18	127
scaffold_18571	19956	33.84	115
scaffold_368	19925	31.54	134
scaffold_14368	19905	34.67	119
scaffold_6415	19868	32.91	115
NODE_168_length_19800_cov_45.572377	19800	34.75	102
scaffold_14462	19784	34.18	111
scaffold_7034	19712	35.16	88
scaffold_448	19697	31.45	142
scaffold_17144	19697	34.24	120
scaffold_16373	19677	33.12	126
scaffold_2476	19666	34.53	118
scaffold_12136	19498	34.97	125
NODE_176_length_19496_cov_12.453071	19496	38.95	37
scaffold_4110	19419	39.09	101
scaffold_2353	19402	38.39	108
scaffold_1593	19394	33.05	90
scaffold_12558	19376	35.76	113
scaffold_13481	19372	35.97	120
scaffold_11475	19338	34.57	131
scaffold_7212	19327	34.72	110
scaffold_11023	19286	33.28	104
scaffold_10058	19282	33.85	125
scaffold_7738	19268	35.45	122
scaffold_13718	19265	35.38	120
scaffold_1693	19259	34.88	99
NODE_179_length_19356_cov_51.577364	19249	32.33	133
scaffold_14951	19177	36.52	109
scaffold_11043	19164	34.76	123
scaffold_4368	19161	34.49	122
scaffold_74	19142	36.42	111
scaffold_15299	19118	34.36	123
scaffold_15103	19091	30.52	140
NODE_181_length_19279_cov_47.882877	19085	36.18	117
scaffold_9717	19073	33.68	65
scaffold_15520	19048	33.66	121
scaffold_3728	19039	32.21	84
scaffold_11105	19038	31.95	123
scaffold_13203	19031	34.45	110
scaffold_12768	19025	33.46	125
scaffold_1055	19024	34.1	72
scaffold_5614	19012	32.1	133
scaffold_851	18968	36.85	109
scaffold_13148	18959	36.86	107
NODE_186_length_19038_cov_52.969833	18941	33.27	132
scaffold_14560	18938	35.26	113
scaffold_6055	18927	32.28	127
scaffold_11326	18918	34.03	133
scaffold_5071	18917	36.71	108
scaffold_1579	18896	39.05	97
scaffold_12971	18882	35.23	96
scaffold_7025	18878	34.74	120
scaffold_15263	18825	36.39	116
scaffold_15060	18821	36.03	115
scaffold_16125	18816	36.36	114
scaffold_4431	18806	34.68	120
NODE_189_length_18803_cov_50.738866	18803	37.36	124
scaffold_1040	18794	35.16	118
NODE_187_length_18982_cov_48.142177	18787	38.06	118
NODE_190_length_18783_cov_50.910082	18783	33.27	124
scaffold_10323	18782	34.13	67
scaffold_10840	18774	35.93	123
NODE_185_length_19039_cov_44.394895	18745	35.71	116
scaffold_16307	18722	35.52	118
scaffold_12728	18720	35.6	108
scaffold_15813	18719	36.4	108
scaffold_6440	18701	32.21	149
scaffold_15467	18701	31.11	148
scaffold_832	18686	33.67	114
scaffold_5956	18673	34.71	115.5
scaffold_4764	18670	32.33	117
scaffold_2525	18638	37.12	112
scaffold_12327	18630	32.22	97
scaffold_7088	18551	33.81	111
scaffold_5279	18540	31.86	128
scaffold_17398	18534	35.92	107
scaffold_13517	18531	35.21	67
scaffold_16927	18521	37.07	112
scaffold_8306	18495	34.93	122
NODE_200_length_18489_cov_24.480448	18489	31.51	51
scaffold_9244	18476	36.11	104
scaffold_18562	18469	36.53	116
scaffold_193	18465	34.1	126
scaffold_2731	18448	35.48	109
scaffold_8664	18429	35.48	113
scaffold_2679	18421	37.7	111
scaffold_14316	18412	37.21	110
scaffold_438	18411	33.57	96
NODE_204_length_18404_cov_25.788181	18404	40.08	59
NODE_197_length_18667_cov_48.241474	18376	36.74	129
scaffold_2013	18332	36.27	112
NODE_195_length_18684_cov_45.551567	18293	34.63	121
NODE_191_length_18775_cov_46.179645	18286	35.05	118
scaffold_10183	18283	34.08	111
scaffold_5391	18277	37.99	112
scaffold_849	18266	30.5	156
scaffold_14125	18256	38.01	102
scaffold_9184	18249	35.34	92
scaffold_11151	18233	30.75	91
scaffold_16230	18221	37.36	104
scaffold_13285	18211	33.98	117
NODE_201_length_18486_cov_46.906133	18195	33.59	120
scaffold_9016	18175	37.31	108
scaffold_17870	18169	33.87	125
scaffold_13262	18119	39.21	70
scaffold_9930	18079	34.06	114
scaffold_14527	18050	35.05	110
scaffold_3679	18049	34.48	98
scaffold_11617	18040	33.27	125
scaffold_11698	18034	35	118
NODE_209_length_18215_cov_48.993164	18022	31.91	140
NODE_211_length_18171_cov_53.513651	17976	31.23	145
scaffold_3200	17960	36.11	115
scaffold_12431	17946	39.9	99
scaffold_4274	17940	34.61	120
scaffold_10967	17922	34.03	127
scaffold_11900	17919	35.28	117
scaffold_14417	17916	36.92	106
scaffold_15512	17916	36.15	111
scaffold_2905	17912	34.94	129
NODE_206_length_18278_cov_46.747322	17895	33.68	130
scaffold_6013	17881	35.73	114
NODE_219_length_17888_cov_52.265061	17879	38.33	110
NODE_208_length_18243_cov_39.458879	17857	32.21	92
scaffold_15860	17843	35.95	114
scaffold_5481	17805	31.39	81
scaffold_17146	17790	35.19	114
scaffold_10309	17785	36.49	111
scaffold_16572	17778	35.46	104
scaffold_13856	17752	37.04	111
scaffold_18033	17736	33.92	77
scaffold_2455	17698	37	108
scaffold_8177	17689	38.08	110
NODE_218_length_17979_cov_45.557033	17689	38.32	103
scaffold_10023	17664	34.44	86
scaffold_592	17651	35.7	120
scaffold_17393	17650	36.18	119
scaffold_4079	17642	35.9	115
scaffold_15914	17632	33.83	123
scaffold_11959	17627	35.28	112
scaffold_17528	17625	37.98	101
scaffold_2903	17617	32.79	135
scaffold_11849	17610	36.48	107
scaffold_3972	17574	36.23	120
scaffold_18734	17541	32.64	87
scaffold_1344	17533	30	118
scaffold_13878	17496	34.05	112
scaffold_16139	17488	33.11	123
scaffold_10558	17476	39.33	95
scaffold_11839	17406	32.7	111
scaffold_5994	17404	32.14	140
scaffold_9774	17401	32.19	84
scaffold_11178	17392	35.01	105
scaffold_6513	17368	32.82	123
scaffold_14498	17363	31.23	139
scaffold_14992	17351	33.97	119
scaffold_15351	17349	42	91
scaffold_4687	17330	35.05	119
scaffold_2699	17318	36.5	110
scaffold_5054	17312	41.95	86
scaffold_18531	17274	32.33	131
scaffold_5454	17255	36.57	108
NODE_239_length_17255_cov_51.554779	17255	31.48	136
scaffold_12610	17245	37.47	108
scaffold_15558	17234	35.31	111
scaffold_8175	17222	34.96	120
scaffold_10336	17221	34.42	131
scaffold_11268	17209	37.63	105
scaffold_8273	17177	35.31	89
scaffold_13168	17172	38.44	110
scaffold_14746	17172	35.98	115
scaffold_16238	17144	36.65	98
scaffold_1688	17121	37.99	111
scaffold_6795	17116	30.84	136
scaffold_6399	17113	33.86	85
scaffold_9275	17106	36.3	113
scaffold_4544	17096	38.95	103
scaffold_14058	17090	38.1	111
scaffold_9619	17084	35.22	114
scaffold_5681	17066	34.28	131
scaffold_1219	17022	35.39	118
scaffold_10020	16978	39.58	24
scaffold_4495	16965	32.2	124
scaffold_2205	16960	37.78	111
scaffold_4046	16958	32.7	134
scaffold_9791	16954	31.08	144
scaffold_4359	16936	38.78	110
scaffold_8352	16912	31	137
scaffold_16174	16888	36.88	108
scaffold_5641	16885	34.72	128
scaffold_17903	16880	30.39	141
scaffold_13345	16877	35.74	110
scaffold_3594	16866	35.62	97
NODE_261_length_16860_cov_46.339331	16860	38.73	111
NODE_249_length_17041_cov_84.902794	16847	34.74	130
NODE_263_length_16834_cov_64.574387	16834	31.26	147
scaffold_18406	16796	35.2	114
NODE_253_length_16988_cov_55.244279	16791	33.05	140
NODE_264_length_16798_cov_55.293762	16788	32.2	139
scaffold_2921	16779	33.7	115
scaffold_7869	16777	32.84	140
scaffold_2442	16767	37.51	108
scaffold_7822	16765	37.58	56
NODE_257_length_16939_cov_45.625667	16743	35.66	109
scaffold_15187	16739	35.65	108
scaffold_15833	16734	28.98	146
scaffold_18655	16733	33.96	120
scaffold_18152	16707	35.61	106
scaffold_3056	16694	30.64	145
scaffold_14576	16687	34.91	122
scaffold_17229	16685	39.87	95
scaffold_3994	16679	32	135
scaffold_7051	16666	34.24	117
scaffold_835	16653	37.45	100
scaffold_10294	16650	29.05	122
scaffold_14376	16650	33.24	128
scaffold_11901	16636	33.45	113
scaffold_6690	16579	33.48	130
scaffold_4899	16575	35.02	120
scaffold_17972	16541	36.01	118
scaffold_6985	16540	33.94	121
scaffold_5419	16532	32.42	123
scaffold_11477	16516	38.67	107
scaffold_15140	16511	35.69	118
scaffold_9548	16504	34.15	126
scaffold_2039	16498	39.17	92
scaffold_10710	16498	31.93	140
scaffold_6266	16496	35.93	114
scaffold_11226	16492	35.31	122
scaffold_18011	16465	35.82	114
NODE_262_length_16855_cov_41.959530	16459	40.96	97
scaffold_12419	16446	32.98	133
scaffold_14347	16422	37.17	96
scaffold_761	16417	34.39	116
scaffold_9763	16395	35.54	123
NODE_259_length_16871_cov_46.374717	16388	35.57	114
scaffold_2262	16371	36.5	95
scaffold_5399	16368	36.08	118
NODE_284_length_16351_cov_60.432162	16351	29.96	151
NODE_285_length_16345_cov_46.548070	16345	36.44	111
scaffold_8488	16319	35.19	113
NODE_270_length_16608_cov_48.982336	16319	34.74	118
scaffold_9413	16303	31.97	126
NODE_271_length_16591_cov_42.781579	16300	34.6	103
scaffold_2314	16297	35.3	116
scaffold_2534	16281	31.64	127
scaffold_9434	16281	32.16	129
scaffold_260	16279	37.71	111
scaffold_8411	16277	32.9	78
scaffold_2452	16266	32.26	112
scaffold_8199	16262	31.88	133
scaffold_13319	16258	36.76	111
NODE_288_length_16254_cov_59.234778	16254	31.54	137
scaffold_4747	16248	31.98	133
scaffold_10808	16239	38.54	109
NODE_276_length_16525_cov_49.730727	16233	37.15	112
scaffold_11503	16232	33.34	130
scaffold_8746	16230	33.4	127
scaffold_3372	16227	34.72	123
scaffold_9702	16203	34.41	116
scaffold_9285	16196	36.21	108
NODE_289_length_16189_cov_16.602222	16189	38.3	32
scaffold_15326	16170	38.03	105
NODE_275_length_16543_cov_43.513118	16154	38.64	104
scaffold_15285	16127	34.48	119
scaffold_5778	16100	36.94	114
scaffold_15246	16091	33.2	92
scaffold_18627	16084	36.97	89
scaffold_7872	16070	34.23	121
scaffold_3363	16061	33.39	85
scaffold_18764	16053	34.24	113
scaffold_10681	16048	32.7	130
scaffold_9489	16044	32.26	117
scaffold_18175	16031	33.28	106
scaffold_11585	16029	35.28	123
scaffold_10135	16023	32.22	141
scaffold_2896	16020	33.15	124
scaffold_12152	16016	33.22	103
scaffold_375	15997	39.29	104
scaffold_8865	15992	36.37	115
scaffold_9615	15989	32.25	129
scaffold_3850	15978	34.35	113
scaffold_9393	15975	34.69	124
scaffold_15909	15955	33.3	126
scaffold_1730	15938	38.93	99
scaffold_4491	15927	35.36	114
scaffold_6221	15926	38.17	101
scaffold_1194	15919	32.9	132
NODE_292_length_16103_cov_47.999438	15906	35.63	121
scaffold_4417	15901	36.91	110
scaffold_281	15898	41.05	94
scaffold_11419	15898	36.07	115
scaffold_1103	15885	34.33	115
NODE_298_length_15882_cov_39.213300	15882	30.99	125
scaffold_14284	15870	32.42	131
scaffold_2947	15869	31.39	124
scaffold_5394	15868	34.39	125
scaffold_13613	15867	33.66	132
scaffold_3021	15856	34.78	127
scaffold_3157	15841	37.98	109
scaffold_15309	15821	32.78	132
scaffold_8836	15818	34.46	100
NODE_304_length_15817_cov_44.929161	15817	39.84	102
scaffold_6615	15816	37.68	111
scaffold_5721	15810	34.55	109
scaffold_9190	15801	37.67	99
scaffold_2977	15781	36.01	119
scaffold_16970	15776	32.85	116
scaffold_7158	15772	35.63	98
scaffold_678	15752	33.27	125
scaffold_3173	15750	38.05	101
NODE_303_length_15843_cov_59.216859	15747	32.03	140
scaffold_12082	15746	35.02	116
scaffold_12145	15735	42.31	89
scaffold_139	15702	34.75	113
scaffold_12188	15688	37.57	98
scaffold_33	15680	35.64	117
scaffold_9912	15679	35.32	117
scaffold_12406	15674	32.61	96
scaffold_801	15656	33.02	113
scaffold_8144	15648	39.7	97
NODE_312_length_15628_cov_35.268343	15628	31.28	101
scaffold_9335	15625	35.29	111
scaffold_9210	15596	30.63	121
scaffold_9534	15595	38.17	98
scaffold_4508	15581	37.65	78
scaffold_2306	15570	33.37	122
scaffold_12649	15564	34.55	97
scaffold_14745	15561	32.48	129
NODE_310_length_15653_cov_55.886813	15556	31.51	138
scaffold_8700	15540	32.67	108
scaffold_4917	15534	35.53	104
scaffold_3783	15517	35.35	120
scaffold_8486	15492	36.77	111
scaffold_10594	15486	35.5	114
scaffold_254	15470	33.87	131
scaffold_514	15468	32.92	120
scaffold_617	15467	36.85	108
scaffold_11483	15460	33.2	86
NODE_322_length_15443_cov_27.094429	15443	31.25	117
scaffold_4885	15434	33.45	83
scaffold_9464	15433	32.99	120
scaffold_18640	15425	34.88	91
scaffold_470	15421	35.71	109
scaffold_9684	15418	30.81	134
scaffold_6986	15396	32.73	127
NODE_309_length_15669_cov_44.090623	15376	34.09	121
scaffold_12735	15373	37.3	111
scaffold_510	15352	36.42	116
scaffold_12978	15351	35.03	115
scaffold_17059	15326	34.17	106
scaffold_14364	15315	32.87	133
scaffold_3479	15309	35.27	114
scaffold_5771	15302	36.65	70
scaffold_17169	15301	36.64	106
scaffold_3687	15283	38.89	75
scaffold_13785	15276	34.79	124
NODE_334_length_15261_cov_31.892584	15261	33.62	88
scaffold_1163	15246	37.47	107
scaffold_13245	15246	32.34	133
scaffold_4435	15240	34.87	119
scaffold_6199	15232	33.62	124
scaffold_14230	15228	36.89	108
scaffold_17067	15216	40.44	96
scaffold_13497	15206	37.66	103
scaffold_6876	15203	33.51	131
scaffold_3589	15200	32.28	136
scaffold_11521	15198	36.92	113
scaffold_338	15187	36.64	110
scaffold_1521	15184	40.33	96
scaffold_8369	15183	37	105
NODE_327_length_15343_cov_59.097603	15147	34.69	133
scaffold_15662	15144	34.31	91
scaffold_14306	15139	31.87	141
scaffold_11084	15137	35.89	101
scaffold_14266	15136	38.68	100
scaffold_729	15123	34.73	100
scaffold_10190	15117	36.2	115
NODE_329_length_15304_cov_49.007487	15111	37.51	118
NODE_343_length_15107_cov_18.359348	15107	38.45	62
scaffold_7659	15106	37.69	111
scaffold_9349	15101	33.79	122
scaffold_16251	15076	37.8	104
scaffold_7666	15056	33.72	129
scaffold_17372	15053	38.58	104
scaffold_11969	15046	31.82	110
NODE_338_length_15244_cov_50.263401	15043	32.38	124
NODE_347_length_15034_cov_34.084910	15034	36.54	88
NODE_318_length_15501_cov_41.390949	15015	40.41	97
scaffold_18365	15013	33.64	113
scaffold_2686	15008	33.97	122
NODE_349_length_15000_cov_50.084835	15000	33.87	127
scaffold_11407	14995	32.61	93
NODE_350_length_14992_cov_54.601784	14992	33.48	137
scaffold_18290	14975	37.32	104
scaffold_11373	14973	37.01	112
scaffold_15455	14973	34.77	115
scaffold_12817	14964	34.97	107
scaffold_6787	14961	35.52	117
scaffold_4333	14940	32.64	119
scaffold_5140	14940	37.18	108
scaffold_17966	14937	34.79	82
scaffold_14353	14929	33.87	125
scaffold_5208	14927	33.31	115
scaffold_9013	14921	35.12	112
scaffold_7222	14902	38.06	111
scaffold_2317	14899	35.96	80
scaffold_12146	14898	36.39	107
NODE_341_length_15173_cov_53.959724	14887	34.99	128
scaffold_16931	14882	35.62	106
scaffold_3311	14871	34.56	110
scaffold_18477	14861	36.74	101
NODE_356_length_14857_cov_53.995469	14857	32.89	142
NODE_346_length_15044_cov_49.834035	14848	34.71	120
scaffold_4565	14840	38.35	99
scaffold_15608	14838	32.97	123
scaffold_9225	14836	31.63	104
NODE_348_length_15028_cov_58.646913	14834	33.34	134
scaffold_9145	14831	34.39	116
scaffold_2145	14826	42.87	76
scaffold_3986	14813	31.84	82
scaffold_13511	14813	32.57	107
scaffold_7614	14811	36.56	117
scaffold_208	14807	35.07	111
scaffold_9865	14806	35.48	110
NODE_360_length_14805_cov_163.643265	14805	34.22	124
scaffold_16403	14799	37.33	110
scaffold_1537	14772	37.37	109
scaffold_15795	14753	35.89	116
scaffold_12818	14749	34.14	119
scaffold_17413	14744	35.01	102
scaffold_4091	14702	33.25	123
scaffold_15544	14700	36.33	110
scaffold_1926	14664	33.56	110
scaffold_15229	14653	32.42	143
NODE_353_length_14940_cov_44.122452	14652	37.36	106
scaffold_10948	14647	34.64	109
scaffold_8548	14637	36.8	88
scaffold_11800	14632	36.06	112
NODE_376_length_14630_cov_59.273483	14630	31.72	146
scaffold_5304	14616	38.29	110
scaffold_4654	14604	34.52	109
scaffold_1740	14600	30.55	133
scaffold_15420	14598	39.01	107
scaffold_17667	14593	32.06	144
scaffold_5166	14581	40.11	89
scaffold_13327	14580	32.42	124
scaffold_10595	14579	43.69	90
scaffold_13233	14575	41.48	95
NODE_371_length_14671_cov_47.247636	14575	35.7	119
scaffold_7485	14570	37.63	113
scaffold_6988	14568	34.2	122
scaffold_7827	14565	35.63	107
scaffold_17878	14553	35.95	112
scaffold_5908	14552	39.53	98
scaffold_587	14550	32.98	124
NODE_368_length_14743_cov_44.374540	14550	36.16	111
scaffold_16201	14541	32.27	107
scaffold_516	14538	33.15	85
scaffold_415	14522	38.79	105
scaffold_431	14520	34.23	117
scaffold_8212	14507	33.85	103
scaffold_12823	14501	38.88	94
scaffold_17103	14500	39.14	92
NODE_355_length_14881_cov_42.515706	14497	35.63	108
NODE_381_length_14588_cov_44.387499	14491	37.83	113
scaffold_16384	14488	37.04	101
scaffold_14203	14486	33.81	116
scaffold_4814	14477	32.62	117
scaffold_8333	14467	34.69	103
scaffold_10040	14450	36.33	120
scaffold_5204	14449	34.44	121
NODE_390_length_14447_cov_61.703549	14447	30.93	146
NODE_373_length_14642_cov_47.446069	14446	35.87	118
scaffold_8840	14437	34.54	123
scaffold_8378	14434	34.62	122
scaffold_8000	14430	35.86	114
NODE_378_length_14626_cov_33.729947	14430	32.11	79
scaffold_12977	14423	35.34	123
scaffold_18031	14422	34.06	104
NODE_369_length_14692_cov_23.530482	14404	35.75	59
scaffold_7052	14403	34.06	120
scaffold_5636	14399	36.16	109
scaffold_11722	14395	36.94	106
scaffold_2368	14389	36.19	66
NODE_395_length_14387_cov_54.911321	14387	31.72	136
scaffold_2297	14385	35.63	120
scaffold_7237	14381	32.83	129
scaffold_8923	14379	37.39	112
NODE_364_length_14769_cov_50.009053	14378	34.52	128
NODE_388_length_14481_cov_58.759928	14374	31.22	145
NODE_357_length_14852_cov_54.024704	14365	31.76	140
scaffold_4483	14362	31.4	144
scaffold_8138	14359	33.94	123
scaffold_16367	14354	38.17	118
scaffold_14495	14347	34.13	103
scaffold_11329	14331	39.2	87
scaffold_1387	14319	34.26	125
scaffold_2500	14319	33.56	122
scaffold_9546	14315	33.84	80
scaffold_6658	14312	38.31	101
scaffold_13374	14304	37.52	102
NODE_398_length_14302_cov_33.048506	14302	31.9	80
scaffold_15745	14301	37.53	111
scaffold_11789	14299	37.12	109
scaffold_6521	14278	36.3	117
scaffold_15232	14277	33.77	115
scaffold_6600	14275	42.91	92
scaffold_7144	14272	32.99	94
scaffold_18029	14260	34	118
scaffold_5765	14256	33.98	107
scaffold_7317	14250	34.46	115
scaffold_4200	14247	35.27	122
scaffold_13310	14244	33.72	113
scaffold_1441	14242	38.44	98
scaffold_16310	14239	34.96	110
NODE_385_length_14515_cov_51.251801	14229	32.99	131
scaffold_2718	14228	34.02	72
scaffold_14713	14219	33.26	117
scaffold_11348	14199	37.9	108
scaffold_153	14196	38.76	103
scaffold_14045	14193	35.41	119
scaffold_15625	14189	40.64	89
scaffold_5123	14185	34.09	123
scaffold_9519	14184	34.81	111
scaffold_15617	14179	35.25	108
scaffold_18344	14177	32.09	121
scaffold_10623	14168	37.12	108
scaffold_6989	14163	34.75	120
scaffold_3595	14162	34.88	116
scaffold_6614	14147	35.92	79
scaffold_17140	14132	34.26	116
scaffold_17590	14127	32.93	132
NODE_405_length_14127_cov_27.411530	14127	40.72	71
scaffold_5139	14122	34.53	125
scaffold_2729	14101	32.98	133
scaffold_12480	14087	34.67	119
scaffold_6946	14063	39.14	94
scaffold_13151	14063	36	98
scaffold_10373	14061	40.49	90
NODE_412_length_14058_cov_58.665761	14058	30.91	145
scaffold_4182	14041	34.48	106
scaffold_9893	14037	35.95	121
NODE_413_length_14035_cov_28.740239	14035	30.16	68
scaffold_7871	14034	32.07	134
scaffold_6857	14033	34.33	98
scaffold_18453	14028	37.74	104
scaffold_12665	14022	38.25	104
scaffold_1492	14010	37.09	105
NODE_416_length_14005_cov_48.130241	14005	33.9	128
scaffold_15503	14001	34.82	113
scaffold_6881	13998	33.23	127
scaffold_4123	13997	38.23	103
scaffold_14599	13995	39.53	96
scaffold_17666	13994	32.62	136
scaffold_1422	13993	35.62	116
scaffold_8441	13992	34.88	107
NODE_418_length_13987_cov_28.175198	13987	35.63	77
scaffold_5149	13986	36.2	114
scaffold_7797	13981	35.15	108
scaffold_17737	13976	37.67	114
scaffold_13336	13966	32.31	72
scaffold_16145	13964	34.33	113
scaffold_17879	13958	32.68	126
scaffold_2820	13956	36.8	115
scaffold_5513	13954	36.63	108
scaffold_4004	13929	35.76	117
scaffold_18423	13926	38.5	107
scaffold_2552	13912	36.9	105
scaffold_6657	13910	33.56	118
scaffold_9229	13906	37.98	109
scaffold_10818	13905	33.5	125
scaffold_268	13894	33.59	129
NODE_396_length_14374_cov_45.214730	13887	33.73	121
NODE_428_length_13887_cov_16.376539	13887	42.64	54
scaffold_10596	13869	37.05	109
NODE_432_length_13857_cov_57.368578	13857	32.37	141
scaffold_16419	13854	38.84	116
scaffold_16696	13847	38.7	98
scaffold_7788	13846	35.38	123
scaffold_12468	13845	33.07	132
scaffold_11251	13832	37.02	111
scaffold_6087	13831	34.76	115
scaffold_2478	13829	37.38	109
scaffold_8759	13826	35.3	115
NODE_437_length_13826_cov_12.323951	13826	34.71	25
NODE_439_length_13819_cov_56.635715	13819	32.83	130
scaffold_8021	13813	31.7	81
scaffold_9174	13813	32.93	93
NODE_436_length_13813_cov_33.631901	13813	31.38	89
NODE_415_length_14008_cov_44.633838	13812	35.75	114
scaffold_6161	13805	35.26	132
scaffold_11004	13797	41.8	100
scaffold_2104	13792	37.17	112
scaffold_2924	13792	39.23	96
scaffold_13247	13774	32.39	127
scaffold_5691	13772	37.45	102
NODE_404_length_14140_cov_46.840717	13752	38.43	107
NODE_423_length_13941_cov_42.028635	13744	38.27	106
NODE_443_length_13732_cov_32.082387	13732	34.4	66
NODE_435_length_13827_cov_63.166909	13729	33.27	134
NODE_425_length_13912_cov_52.953307	13719	36.69	125
scaffold_14564	13705	36.87	105
scaffold_13898	13703	38.95	107
scaffold_10933	13698	33.45	108
scaffold_15406	13695	33.6	127
scaffold_15943	13681	34.77	99
scaffold_11687	13676	31.13	131
scaffold_15613	13671	37.71	106
scaffold_15891	13665	38.69	102
scaffold_6893	13663	33.11	109
scaffold_12713	13654	40.93	102
scaffold_1980	13652	39.92	100
scaffold_4997	13649	36.9	107
scaffold_6563	13637	34.85	122
NODE_452_length_13623_cov_51.098036	13623	32.68	88
scaffold_365	13614	35.31	123
scaffold_4854	13613	33	129
scaffold_8293	13613	33.06	131
scaffold_96	13606	41.65	96
scaffold_1095	13600	33.63	134
scaffold_15783	13600	33.29	129
scaffold_17863	13592	33.87	108
NODE_455_length_13592_cov_28.935627	13592	41.52	84
scaffold_1389	13590	32.88	119
scaffold_6802	13588	36.45	107
scaffold_10955	13588	38.49	101
scaffold_10483	13586	34.1	131
scaffold_11161	13586	32.67	118
scaffold_10572	13578	37.03	114
scaffold_11893	13577	30.99	112
scaffold_10126	13569	33.1	131
scaffold_10444	13561	37.56	107
NODE_457_length_13555_cov_33.328684	13555	37.4	93
scaffold_4369	13547	34.63	115
scaffold_5206	13546	33.02	133
scaffold_5996	13542	35.3	117
scaffold_1880	13540	39.22	103
scaffold_17578	13538	34.75	115
scaffold_8140	13537	32.91	86
scaffold_6446	13532	34.44	112
scaffold_17083	13529	39.54	101
scaffold_5022	13528	32.56	88
scaffold_9050	13522	32.95	92
scaffold_11057	13519	34.88	103
scaffold_14027	13502	40.35	102
scaffold_11815	13493	34.5	53
scaffold_14480	13482	35.02	110
NODE_431_length_13863_cov_42.043958	13481	36.35	106
scaffold_1742	13460	33.83	119
scaffold_18075	13460	32.96	123
scaffold_6611	13459	32.19	116
scaffold_17956	13450	32.46	126
scaffold_16794	13447	36.92	110
scaffold_12390	13435	33.56	126
scaffold_4128	13434	34.19	127
scaffold_7669	13433	35.03	117
scaffold_17061	13432	34.63	123
scaffold_3230	13420	33.98	124
scaffold_6706	13419	34.79	98
scaffold_14751	13419	36.57	112
scaffold_6553	13418	36.45	107
scaffold_9718	13397	32.56	124
scaffold_6233	13380	35.94	103
scaffold_1684	13375	36.2	113
NODE_450_length_13649_cov_41.354553	13357	41.21	98
scaffold_8999	13355	33.12	96
scaffold_8299	13353	37.76	103
scaffold_3545	13352	31.84	109
scaffold_4430	13342	36.7	111
scaffold_5051	13330	34.1	117
scaffold_1216	13318	37.02	100
scaffold_6953	13315	34.13	110
scaffold_5993	13314	35.95	119
scaffold_6244	13308	38.69	109
scaffold_9545	13306	38.12	107
scaffold_11394	13306	37.35	110
scaffold_5061	13305	35.93	115
scaffold_13925	13302	32.72	115
scaffold_2149	13299	32.24	110
scaffold_18554	13299	36.32	103
NODE_488_length_13294_cov_19.894454	13294	33.86	54
scaffold_10443	13290	38.15	105
scaffold_3958	13287	34.06	116
scaffold_6805	13286	36.04	112
NODE_487_length_13295_cov_51.787108	13286	33.56	126
scaffold_7273	13272	33.31	123
scaffold_5415	13265	34.69	116
scaffold_3127	13264	36.99	108
scaffold_5230	13263	30.98	125
scaffold_14006	13260	37.36	101
scaffold_12354	13258	35.87	115
scaffold_10632	13254	36.03	120
NODE_493_length_13251_cov_30.720206	13251	39.14	77
scaffold_1655	13245	35.09	108
scaffold_7713	13244	33.88	128
scaffold_9251	13244	34.36	115
NODE_481_length_13316_cov_51.817433	13218	34.92	134
scaffold_468	13215	35.67	76
NODE_475_length_13397_cov_42.722673	13207	40.35	99
scaffold_11999	13205	33.56	120
NODE_486_length_13298_cov_47.281900	13202	34.47	123
scaffold_1542	13194	33.78	114
scaffold_4175	13189	33.51	116
scaffold_1589	13186	40.31	106
scaffold_14118	13182	37.2	103
scaffold_14488	13179	34.5	101
scaffold_10987	13173	35.77	114
scaffold_2375	13172	32.87	66
scaffold_3396	13172	37.15	104
scaffold_5900	13172	35.07	109
scaffold_11174	13170	34.73	109
scaffold_11464	13165	32.18	127
scaffold_9297	13164	32.66	128
scaffold_3854	13160	36.25	105
scaffold_15300	13157	38.15	100
scaffold_18111	13157	30.87	86
scaffold_3983	13154	34.26	125
scaffold_1432	13140	34.06	120
scaffold_9737	13133	36.79	106
scaffold_14070	13132	34.59	116
scaffold_13270	13129	36.75	91
scaffold_1566	13128	32.67	107
scaffold_6952	13119	37.37	114
scaffold_14315	13096	32.74	131
NODE_490_length_13277_cov_48.270303	13083	37.39	117
scaffold_806	13074	36.51	105
scaffold_13739	13070	31.95	131
scaffold_1188	13068	35.69	119
scaffold_13906	13064	32.01	133
NODE_505_length_13064_cov_12.580735	13064	39.31	38
scaffold_2698	13057	31.91	94
NODE_506_length_13057_cov_65.281664	13057	29.54	165
scaffold_1436	13047	37.73	108
scaffold_12234	13044	34.38	108
scaffold_12562	13038	32.6	77
scaffold_17467	13031	37.23	97
NODE_483_length_13314_cov_57.806919	13030	32.42	132
NODE_510_length_13028_cov_35.357579	13028	33.64	78
scaffold_7269	13008	37.75	101
scaffold_3817	13004	35.22	87
scaffold_4477	13004	33.82	110
scaffold_18442	13001	35.04	113
scaffold_18489	12989	34.77	105
scaffold_665	12975	34.28	111
scaffold_9239	12973	37.01	110
scaffold_15374	12963	36.94	106
NODE_507_length_13053_cov_54.210543	12961	33.2	138
scaffold_10029	12958	37.24	122
scaffold_7000	12955	37.45	90
scaffold_12178	12949	32.57	113
scaffold_15348	12932	41.76	88
scaffold_3659	12924	33.31	120
scaffold_7922	12917	35.53	117
scaffold_12931	12911	35.17	118
NODE_524_length_12911_cov_24.396992	12911	32.56	51
NODE_515_length_13004_cov_55.479771	12908	33.54	130
scaffold_16876	12902	34.95	106
scaffold_5903	12900	37.17	112
scaffold_12756	12891	35.03	117
scaffold_7097	12890	33.27	118
scaffold_12235	12886	34.9	99
NODE_502_length_13083_cov_106.315316	12881	31.47	245
scaffold_4296	12878	35.84	111
scaffold_2634	12872	31.24	138
scaffold_16861	12870	31.59	138
scaffold_9121	12866	33.63	104
scaffold_10173	12864	39.15	99
scaffold_11052	12861	34.13	112
scaffold_13268	12861	34.72	114
scaffold_6568	12856	34.7	129
scaffold_11525	12856	37.12	118
scaffold_4384	12851	34.36	109
scaffold_383	12849	38.07	94
scaffold_12301	12845	35.08	103
scaffold_10760	12839	31.65	141
scaffold_15052	12834	33.85	125
scaffold_6088	12830	35.32	108
NODE_482_length_13316_cov_45.414080	12828	35.56	124
scaffold_12231	12826	37.87	103
scaffold_5138	12825	34.28	110
scaffold_15102	12819	32.44	85
scaffold_13594	12815	33.44	122
scaffold_5335	12811	33.26	102
scaffold_13615	12810	40.09	92
scaffold_12944	12809	34.05	122
scaffold_5401	12806	32.67	107
scaffold_9243	12806	36.48	110
scaffold_6427	12804	33.42	83
scaffold_6640	12792	35.18	107
scaffold_6433	12789	31.65	136
scaffold_16202	12788	36.93	103
scaffold_4626	12787	35.94	106
scaffold_449	12778	36.91	102
scaffold_671	12778	33.77	116
scaffold_18113	12778	33.57	125
scaffold_13558	12774	35.11	121
scaffold_2757	12771	34.38	125
scaffold_15855	12771	44.4	99
scaffold_17629	12769	30.81	128
NODE_543_length_12766_cov_28.316258	12766	33.67	64
scaffold_5371	12763	35.38	113
scaffold_4135	12761	35.7	107
scaffold_8217	12757	37.6	105
NODE_508_length_13039_cov_56.015738	12753	34.07	133
scaffold_7355	12749	31.39	98
scaffold_902	12747	31.81	134
scaffold_2388	12747	36.49	111
scaffold_4432	12746	38.09	103
scaffold_16346	12745	36.69	100
NODE_522_length_12917_cov_49.280452	12728	36.93	111
scaffold_9033	12720	37.67	106
scaffold_9132	12704	38.44	96
scaffold_1131	12703	31.03	123
scaffold_2033	12700	36.34	105
scaffold_97	12695	35.96	115
scaffold_17761	12693	34.96	89
NODE_517_length_12980_cov_43.586530	12687	39.48	100
scaffold_13390	12678	32.69	131
scaffold_15488	12676	33.3	126
scaffold_12723	12663	34.05	113
scaffold_1931	12659	34.99	100
scaffold_7224	12657	35.54	103
NODE_531_length_12854_cov_47.764420	12656	33.11	121
scaffold_1806	12653	33.23	127
scaffold_1783	12649	33.96	116
scaffold_9218	12638	35.28	104
NODE_538_length_12827_cov_47.706667	12632	35.78	113
scaffold_3169	12631	40.31	98
scaffold_13334	12615	33.55	85
scaffold_13945	12612	36.12	111
NODE_556_length_12609_cov_29.224705	12609	30.11	95
scaffold_1541	12605	37.6	102
NODE_557_length_12599_cov_39.333546	12599	27.56	125
scaffold_10925	12597	35.44	116
scaffold_731	12587	31.5	132
NODE_559_length_12585_cov_28.716901	12585	34.87	69
scaffold_9478	12582	33.71	106
scaffold_8757	12576	34.16	112
scaffold_18681	12571	35.73	97
scaffold_3004	12568	31.91	134
scaffold_11294	12562	32.98	123
scaffold_4459	12561	35.33	114
NODE_564_length_12549_cov_53.552197	12549	34.76	56
NODE_567_length_12537_cov_34.074799	12537	32.01	81
scaffold_9324	12527	37.61	73
scaffold_16392	12523	29.01	85
NODE_548_length_12718_cov_52.606439	12522	33.41	130
scaffold_8749	12506	32.5	102.5
NODE_573_length_12506_cov_47.323196	12506	38.3	112
NODE_551_length_12698_cov_57.534427	12505	33.27	134
scaffold_15176	12503	35.78	115
NODE_576_length_12489_cov_31.378958	12489	29.85	132
scaffold_13012	12484	32.76	142
scaffold_13498	12483	35.47	113
scaffold_2868	12482	39.75	93
NODE_579_length_12475_cov_51.087675	12475	37.52	116
NODE_578_length_12474_cov_31.478548	12474	33.1	106
scaffold_8383	12469	33	109
NODE_583_length_12458_cov_59.624152	12458	32.16	101
scaffold_10327	12457	35.99	102
NODE_585_length_12454_cov_15.325523	12454	35.56	38
scaffold_1342	12450	34	115
scaffold_14172	12443	33.94	107
scaffold_7064	12438	35.97	107
scaffold_8240	12429	38.33	103
scaffold_10518	12420	36.89	97
scaffold_9720	12418	35.03	105
scaffold_18614	12418	36.02	114
scaffold_17521	12411	35.12	115
scaffold_13165	12404	35.62	108
NODE_590_length_12404_cov_7.888799	12404	42.81	20
scaffold_17704	12401	35.12	116
scaffold_625	12399	36.03	118
scaffold_9821	12398	34.13	116
scaffold_4914	12386	37.39	102
scaffold_12102	12384	33.75	100
scaffold_10440	12379	37.1	105
scaffold_9969	12378	32.25	137
scaffold_6382	12366	34.87	133
scaffold_11207	12366	36.5	108
scaffold_8051	12363	38.57	100
scaffold_7042	12362	38.79	106
scaffold_11651	12360	37.47	91
NODE_594_length_12354_cov_33.062637	12354	34.59	79
scaffold_14012	12350	35.77	116
NODE_595_length_12350_cov_20.536788	12350	39.8	65
scaffold_15127	12346	35.53	96
scaffold_17012	12346	38.36	110
scaffold_15751	12344	34.19	104
scaffold_844	12343	34.91	97
scaffold_2771	12339	36.09	117
NODE_599_length_12337_cov_74.057278	12337	40.87	107
scaffold_3223	12328	37.52	114
scaffold_14064	12324	37.2	108
scaffold_16338	12321	36.03	112
scaffold_15185	12306	33.44	127
NODE_604_length_12304_cov_27.376186	12304	33.49	114
scaffold_12184	12302	37.45	113
NODE_605_length_12302_cov_9.254989	12302	41.73	41
NODE_607_length_12301_cov_15.935537	12301	34.64	44
NODE_608_length_12300_cov_65.924487	12300	28.54	158
NODE_577_length_12489_cov_47.006768	12295	34.91	120
scaffold_6838	12288	35.74	108
scaffold_13156	12288	36.91	90
NODE_609_length_12285_cov_14.604767	12285	38.58	54
scaffold_18019	12273	37.59	107
scaffold_17277	12272	36.34	109
scaffold_6138	12270	35.45	90
scaffold_10713	12265	35.47	128
scaffold_2878	12259	38	110
NODE_586_length_12449_cov_49.660281	12256	33.52	126
scaffold_9532	12247	35.31	104
scaffold_2923	12242	33.78	123
scaffold_13079	12240	34.35	130
scaffold_7943	12229	38.83	105
scaffold_14765	12227	32.94	130
scaffold_13885	12224	35.27	118
NODE_615_length_12221_cov_44.796690	12221	27.7	153
scaffold_16563	12216	35.08	112
scaffold_964	12213	37.53	110
scaffold_2576	12212	35.89	120
scaffold_17824	12209	34.13	128
scaffold_9133	12207	38.36	104
scaffold_6902	12203	36.96	107
scaffold_7335	12196	34.48	109
scaffold_15416	12186	37.39	114
scaffold_1649	12184	35.57	111
scaffold_7527	12182	32.42	119
scaffold_3356	12173	33.96	78
scaffold_12365	12169	37.71	102
scaffold_17893	12169	36.76	118
NODE_622_length_12163_cov_35.053446	12163	40.84	84
scaffold_4132	12157	36.58	112
NODE_597_length_12340_cov_57.973500	12155	31.31	145
NODE_624_length_12148_cov_23.402535	12148	27.94	69
scaffold_8537	12146	37.25	110
scaffold_3873	12142	36.9	100
scaffold_15811	12139	35.53	102
scaffold_1072	12133	34.09	109
scaffold_9520	12132	33.88	134
scaffold_1882	12129	35.74	112
scaffold_13709	12121	39.06	88
NODE_629_length_12117_cov_45.445930	12117	31.77	134
NODE_589_length_12408_cov_50.427865	12116	35.8	118
scaffold_14095	12115	36.02	90
scaffold_16767	12115	36.14	109
NODE_575_length_12492_cov_49.815465	12108	34.91	122
scaffold_6281	12107	33.01	130
scaffold_11041	12107	33.77	118
scaffold_15471	12104	33.25	116
NODE_558_length_12587_cov_25.237890	12103	32.17	65
scaffold_7424	12101	36.14	111
scaffold_18198	12097	32.96	135
NODE_634_length_12084_cov_38.876489	12084	41.34	98
scaffold_8697	12082	35.13	122
scaffold_10356	12080	33.68	119
scaffold_11705	12080	36.24	76
scaffold_2887	12077	30.87	147
scaffold_5555	12076	33.38	164
scaffold_7786	12074	35.03	117
scaffold_336	12070	34.08	97
scaffold_10550	12066	38.96	104
scaffold_1575	12065	36.66	111
scaffold_17320	12065	33.65	118
NODE_638_length_12070_cov_27.154590	12060	30.59	81
scaffold_10332	12055	36.1	109
scaffold_8725	12052	38.5	112
NODE_625_length_12147_cov_65.486413	12052	30.21	159
scaffold_1641	12049	37.47	85
NODE_626_length_12146_cov_50.719198	12049	33.73	128
scaffold_5806	12045	33.86	88
scaffold_13280	12045	34.6	117
scaffold_16999	12041	33.73	81
scaffold_8231	12033	32.02	134
scaffold_1114	12031	33.46	108
scaffold_17994	12030	35.3	115
scaffold_775	12027	32.01	105
scaffold_16332	12027	34.76	123
NODE_588_length_12414_cov_48.351706	12025	37.79	112
scaffold_112	12022	37.12	104
scaffold_17074	12019	34.27	55
scaffold_14851	12017	34.43	95
scaffold_9712	12016	35.13	127
scaffold_12961	12007	32.69	129
scaffold_12382	12004	36.24	130
scaffold_18483	12004	36.54	108
scaffold_4877	11998	35.42	97
scaffold_13780	11998	34.11	67
scaffold_17888	11996	35.2	118
NODE_647_length_11993_cov_26.761497	11993	29.46	61
scaffold_568	11992	40.84	79
NODE_648_length_11992_cov_69.525892	11992	39.76	174
scaffold_9433	11991	37.67	99
scaffold_13805	11981	38.67	106
NODE_652_length_11981_cov_26.372626	11981	33.05	59
NODE_636_length_12079_cov_61.739293	11980	31.69	143
scaffold_2512	11979	35.05	127
scaffold_15800	11978	33.66	92
scaffold_5606	11977	35.38	105
scaffold_9854	11970	34.26	125
NODE_655_length_11967_cov_56.506560	11967	33.72	132
scaffold_16939	11966	34.56	102
NODE_656_length_11965_cov_48.474428	11965	37.52	108
scaffold_7801	11956	36.43	110
scaffold_12361	11955	34.97	125
scaffold_2365	11954	32.99	107
scaffold_3168	11952	34.13	121
NODE_657_length_11960_cov_42.411176	11950	37.05	107
scaffold_2243	11947	34.13	76
scaffold_11965	11928	36.69	106
scaffold_14780	11916	37.88	103
scaffold_13926	11915	37.62	105
scaffold_11141	11911	34.89	119
scaffold_2114	11909	34.88	124
scaffold_15759	11909	34.42	107
scaffold_17222	11905	34.67	111
scaffold_17020	11902	32.51	125
scaffold_3760	11896	36.41	114
NODE_632_length_12090_cov_52.557979	11896	33.01	132
NODE_633_length_12084_cov_52.719913	11894	32.22	130
scaffold_7893	11888	33.87	118
scaffold_9610	11880	35.03	118
scaffold_9803	11880	37.07	90
scaffold_10146	11879	33.12	93
NODE_621_length_12165_cov_39.002481	11877	34.87	120
scaffold_12469	11874	36.51	97
scaffold_14849	11872	39.94	96
NODE_668_length_11868_cov_31.586549	11868	31.19	77
scaffold_10687	11867	32.31	122
scaffold_7731	11860	39.6	99
scaffold_14816	11860	31.64	133
scaffold_2984	11859	39.35	89
NODE_658_length_11955_cov_52.783549	11858	35.31	119
NODE_672_length_11856_cov_15.088887	11856	35.4	48
scaffold_1151	11853	33.62	98
scaffold_2421	11850	32.65	105
scaffold_6750	11850	34.83	130
scaffold_9364	11844	36.19	108
scaffold_2871	11834	36.07	108
NODE_661_length_11932_cov_58.994601	11833	33.49	139
scaffold_15844	11824	34.13	102
scaffold_8604	11819	38.51	103
scaffold_469	11817	34.76	110
scaffold_13424	11813	36.38	112
NODE_644_length_12004_cov_63.993376	11810	30.92	144
scaffold_6613	11804	34.9	117
scaffold_14835	11804	32.44	125
scaffold_12689	11800	37.67	107
scaffold_14471	11800	30.58	97
NODE_680_length_11784_cov_30.650893	11784	40.57	69
scaffold_4868	11783	32.79	102
scaffold_15529	11783	31.96	134
scaffold_3123	11782	34.84	114
scaffold_11389	11773	37.25	102
NODE_683_length_11770_cov_20.693124	11770	38.09	30
scaffold_1353	11767	37.26	113
scaffold_3474	11766	35.76	110
scaffold_13547	11766	38.52	104
scaffold_2972	11762	31.88	122
scaffold_3524	11753	36.47	93
NODE_673_length_11850_cov_85.208510	11752	43.05	74
scaffold_18169	11751	32.58	109
scaffold_9738	11749	35.55	104
scaffold_1011	11747	34.88	80
scaffold_4842	11745	39.72	103
scaffold_17252	11745	35.11	120
NODE_687_length_11744_cov_50.850690	11744	33.25	120
scaffold_1719	11741	33.49	114
scaffold_11997	11740	38.81	101
scaffold_1597	11736	36.48	92
scaffold_9417	11733	35.02	112
scaffold_9323	11726	33.95	132
NODE_663_length_11917_cov_45.915970	11726	39.48	117
scaffold_11711	11722	34.38	127
scaffold_3706	11714	41.26	95
scaffold_7131	11706	35.83	112
scaffold_1529	11698	36.86	102
scaffold_5297	11698	37.99	113
scaffold_3010	11695	32.48	130
scaffold_16613	11693	31.67	136
scaffold_875	11692	37.91	96
scaffold_13548	11690	34.33	112
scaffold_13259	11685	33.15	136
NODE_695_length_11693_cov_28.850637	11683	34.13	65
scaffold_16059	11677	30.8	145
NODE_682_length_11776_cov_43.780067	11677	39.27	96
scaffold_1780	11676	35.57	114
NODE_701_length_11663_cov_48.911123	11663	35.84	120
NODE_702_length_11663_cov_34.424650	11663	33.36	103
scaffold_11517	11659	35.3	118
scaffold_17178	11650	32.8	131
NODE_706_length_11644_cov_32.724043	11644	33.59	76
NODE_662_length_11928_cov_63.733018	11640	29.18	160
scaffold_7649	11636	36.31	102
NODE_708_length_11632_cov_59.889485	11632	32.84	137
NODE_711_length_11619_cov_31.960319	11619	42.67	79
NODE_712_length_11617_cov_54.979549	11617	30.62	130
scaffold_4223	11616	32.36	72
scaffold_13748	11613	38.45	108
scaffold_18759	11612	35.17	122
scaffold_17162	11611	36.24	119
scaffold_6745	11608	33.4	109
scaffold_11603	11602	33.61	113
scaffold_2352	11601	33.13	100
scaffold_18549	11595	34.96	113
scaffold_2430	11594	33.41	118
scaffold_377	11587	36.31	111
NODE_654_length_11970_cov_44.981841	11585	37.94	106
scaffold_14387	11584	33.85	101
scaffold_6858	11579	33.95	82
NODE_720_length_11578_cov_25.212069	11578	29.99	56
NODE_696_length_11673_cov_61.247499	11575	31.96	141
scaffold_16969	11568	34.29	117
scaffold_15445	11565	37.29	96
NODE_722_length_11561_cov_61.110240	11561	33.05	150
scaffold_4821	11560	34.25	101
scaffold_6395	11560	34.25	121
scaffold_6601	11558	30.74	77
scaffold_7537	11556	35.76	84.5
scaffold_10789	11551	41.36	85
scaffold_15557	11551	35.94	112
scaffold_17948	11550	36.3	101
scaffold_4511	11545	41.86	85
scaffold_4733	11545	34.52	130
NODE_726_length_11540_cov_30.512257	11540	33.39	81
scaffold_3828	11533	31.91	140
scaffold_4327	11532	35.24	118
scaffold_1960	11526	36.11	103
scaffold_5696	11526	32.96	124
scaffold_15755	11524	33.97	124
scaffold_9343	11519	35.15	81
scaffold_9622	11517	35.32	124
scaffold_13918	11517	31.68	98
scaffold_1547	11515	34.05	118
scaffold_11131	11511	33.86	123
scaffold_8837	11510	34.79	112
NODE_692_length_11701_cov_46.360289	11505	35.21	114
scaffold_16736	11504	38.68	99
scaffold_10571	11503	35.53	110
scaffold_15682	11500	30.77	109
scaffold_15749	11499	32.05	118
NODE_678_length_11802_cov_41.797186	11499	35.63	116
scaffold_8752	11496	38.51	105
NODE_718_length_11593_cov_47.796457	11495	32.73	123
scaffold_3	11492	34.87	120
scaffold_18153	11491	36.04	114.5
scaffold_3346	11489	34.9	108
NODE_734_length_11485_cov_39.782258	11485	29.92	118
scaffold_7428	11482	36.48	59
scaffold_18074	11481	39.62	107
scaffold_18286	11481	35.81	86
scaffold_4270	11477	37.41	107
NODE_669_length_11864_cov_42.394163	11476	39.04	92
scaffold_983	11475	34.89	120
scaffold_9385	11470	36.7	109
scaffold_7321	11466	32.67	118
scaffold_13586	11464	38.55	243
scaffold_2951	11452	34.4	128
scaffold_16919	11449	34.25	127
scaffold_5231	11441	37.3	115
NODE_740_length_11438_cov_23.229381	11438	34.2	108
scaffold_3784	11437	34.71	25
NODE_742_length_11434_cov_36.486396	11434	28.82	83
scaffold_5924	11433	33.75	68
scaffold_7156	11432	40.34	92
scaffold_16337	11430	36.54	111
scaffold_1564	11423	36.5	111
NODE_713_length_11612_cov_50.560295	11422	32.15	125
scaffold_5108	11419	36.58	91
scaffold_18275	11416	31.53	88
scaffold_4346	11413	37.36	103
scaffold_7905	11410	34.88	125
scaffold_17517	11410	36.2	73
NODE_747_length_11409_cov_26.500441	11409	31.97	70
scaffold_5095	11402	35.99	96
scaffold_15721	11402	37.89	72
scaffold_17176	11402	34.64	124
scaffold_9601	11400	37.61	107
NODE_749_length_11400_cov_29.153051	11400	29.42	71
scaffold_5315	11399	36.75	115
scaffold_3967	11398	33.01	113
scaffold_6384	11397	35.21	117
scaffold_5285	11393	35.3	116
scaffold_5954	11392	34.93	123
scaffold_8578	11391	35.87	112
scaffold_7994	11389	36.04	110
scaffold_4438	11388	35.31	103
NODE_750_length_11385_cov_22.576052	11385	37.74	55
scaffold_5505	11370	33.24	129
NODE_752_length_11370_cov_65.764279	11370	30.87	156
scaffold_7199	11369	35	103
scaffold_9651	11369	33.45	125
scaffold_9746	11360	32.83	108
NODE_756_length_11360_cov_63.499867	11360	29.58	159
scaffold_16327	11352	37.09	118
scaffold_16604	11352	38.45	105
scaffold_8899	11349	36.63	109
scaffold_355	11346	34.94	107
scaffold_5506	11346	35.99	102
scaffold_8884	11342	38.11	95
NODE_741_length_11436_cov_27.350647	11339	46.43	73
NODE_763_length_11335_cov_12.089448	11335	35.84	71
scaffold_5041	11332	38.03	101
scaffold_5422	11332	35.55	111
NODE_765_length_11331_cov_32.498312	11331	33.86	76
scaffold_18688	11324	35.25	117
scaffold_5796	11320	34.36	119
scaffold_16291	11320	36.4	110
scaffold_7718	11317	34.88	121
NODE_732_length_11503_cov_44.722913	11309	38.22	101
scaffold_18535	11307	37.2	104
scaffold_11353	11305	36.16	112
scaffold_16371	11303	32.55	59
scaffold_10811	11302	34.13	105
scaffold_12370	11301	33.63	78
scaffold_8496	11295	34.8	105
scaffold_5833	11293	34.08	117
scaffold_4479	11289	34.36	90
scaffold_4325	11288	35.25	120
scaffold_17428	11279	38.42	100
scaffold_10873	11276	37.24	104
scaffold_4893	11267	38.33	104
scaffold_4680	11264	37.07	106
scaffold_3341	11257	33.15	132
scaffold_16453	11255	32.76	103
scaffold_2965	11250	36.72	106
scaffold_3802	11247	35.74	107
scaffold_16029	11241	35.41	127
scaffold_16783	11240	33.91	114
scaffold_13916	11234	36.31	111
scaffold_1184	11233	32.52	71
scaffold_13750	11233	35.16	91
NODE_743_length_11424_cov_55.761347	11232	31.54	145
scaffold_1336	11231	35.3	110
scaffold_15952	11228	34.67	114
scaffold_10962	11227	34.72	85
scaffold_3321	11226	34.57	115
scaffold_15895	11226	33.7	134
scaffold_10132	11219	34.52	116
scaffold_10252	11218	34.31	117
scaffold_6599	11217	32.38	140
scaffold_16427	11216	37.95	107
scaffold_9678	11214	33.64	118
scaffold_15941	11214	36.41	102
scaffold_16681	11214	30.33	137
scaffold_17871	11213	36.32	106
scaffold_5866	11209	35.12	113
scaffold_17958	11208	33.11	83
scaffold_3326	11206	34.18	117
scaffold_17375	11205	34.59	110
scaffold_14795	11204	34.47	98
scaffold_14288	11198	32.15	132
scaffold_18669	11198	38.11	97
NODE_785_length_11198_cov_47.119863	11198	28.68	95
NODE_786_length_11198_cov_39.291610	11198	37.64	94
scaffold_1903	11194	30.62	148
NODE_788_length_11189_cov_45.513589	11189	39.55	100
scaffold_5008	11188	33.82	126
scaffold_3683	11183	36.56	101
NODE_789_length_11183_cov_13.688006	11183	39.95	39
scaffold_744	11181	37.77	99
scaffold_6574	11181	38.55	112
scaffold_6585	11180	32.03	132
scaffold_14209	11178	33.4	127
scaffold_18352	11178	31.84	141
scaffold_1166	11177	34.47	105
scaffold_14283	11177	31.22	135
NODE_795_length_11169_cov_31.276956	11169	34.66	78
NODE_796_length_11164_cov_35.107062	11164	33.11	78
scaffold_9416	11163	38.86	102
NODE_772_length_11258_cov_42.418746	11161	35.05	116
scaffold_15877	11154	34.63	112
scaffold_8956	11153	36.91	97
scaffold_11611	11152	35.2	79.5
NODE_739_length_11442_cov_50.914650	11152	34.44	132
NODE_774_length_11248_cov_42.302122	11149	39.94	98
scaffold_295	11140	32.25	106
NODE_798_length_11136_cov_48.638575	11135	32.38	131
NODE_799_length_11132_cov_35.271913	11132	38.74	89
scaffold_14256	11121	31.89	95
scaffold_3183	11120	33.64	124
scaffold_11499	11120	34.74	104
NODE_806_length_11120_cov_9.905460	11120	37.56	24
scaffold_4084	11117	33.27	100
scaffold_14406	11117	36.67	106
scaffold_2582	11116	35.32	110
scaffold_8874	11114	33.4	84
scaffold_6490	11113	36.24	103
scaffold_7070	11109	34.68	120
NODE_784_length_11201_cov_62.878551	11104	28.49	157
NODE_767_length_11301_cov_49.327780	11103	36.12	118
NODE_721_length_11576_cov_40.371771	11099	38.72	105
scaffold_4415	11093	36	118
scaffold_13027	11086	32.27	132
scaffold_3417	11085	35.13	107
scaffold_8117	11084	36.64	101
scaffold_18557	11083	32.98	116
scaffold_3187	11081	36.75	105
scaffold_7749	11076	40.01	94
scaffold_11636	11075	30.6	135
NODE_755_length_11362_cov_44.780968	11075	35.77	109
NODE_792_length_11176_cov_42.398594	11074	36.28	115
scaffold_16833	11072	33.83	126
scaffold_10096	11070	34.21	121
scaffold_10257	11069	34.74	105
scaffold_6554	11066	33.31	118
scaffold_18367	11063	34.27	96
scaffold_11368	11057	37.8	111
scaffold_10056	11053	38.59	108
scaffold_6514	11049	35.58	115
NODE_821_length_11049_cov_42.932738	11049	29.69	141
scaffold_7851	11047	37.79	106
scaffold_5668	11046	33.5	129
scaffold_13147	11046	33.07	133
scaffold_16588	11042	34.43	102
scaffold_4086	11038	34.1	129
scaffold_5929	11038	40.46	89
scaffold_6620	11038	36.83	98
scaffold_8812	11037	37.43	109
scaffold_18683	11035	35.69	101
scaffold_10454	11027	33.24	128
NODE_824_length_11025_cov_41.304165	11025	34.42	105
scaffold_9442	11023	35.04	116
NODE_766_length_11316_cov_31.248955	11022	42.32	102
scaffold_10406	11021	37.8	104
scaffold_1941	11020	30.1	131
scaffold_43	11019	32.48	107
NODE_829_length_11009_cov_30.055342	11009	31.29	83
scaffold_3232	11008	35.43	107
scaffold_7258	11008	33.69	122
scaffold_9775	11007	30.49	133
NODE_768_length_11298_cov_55.213350	11006	31.88	141
scaffold_8721	11002	32.13	86
scaffold_9129	11002	35.21	87
NODE_830_length_10999_cov_26.161036	10999	31.08	106
NODE_787_length_11191_cov_52.737538	10998	32.37	136
scaffold_4664	10990	37.06	109
scaffold_1760	10989	36.13	93
scaffold_6343	10989	37.6	99
scaffold_8062	10988	32.96	108
NODE_769_length_11279_cov_51.912873	10985	30.44	140
scaffold_18099	10981	34.08	110
scaffold_12147	10977	31.61	134
scaffold_15255	10977	37.65	106
scaffold_7913	10974	36.25	83
scaffold_13478	10968	36.53	108
scaffold_17357	10967	35.05	112
NODE_835_length_10962_cov_23.203583	10962	38.1	57
scaffold_1450	10959	34.36	109
scaffold_7906	10958	35.28	110
scaffold_12685	10956	32.93	131
scaffold_8903	10955	37.54	108
scaffold_15580	10952	36.61	112
scaffold_2855	10950	33.27	132
scaffold_16383	10941	32.29	125
scaffold_3397	10940	33.89	124
scaffold_10769	10940	32.82	97
scaffold_16884	10939	37.09	64
NODE_841_length_10935_cov_23.346405	10935	34.64	112
scaffold_11371	10933	36.63	108
NODE_801_length_11130_cov_28.294671	10933	39.96	72
scaffold_5311	10932	32.44	118
NODE_844_length_10932_cov_32.152464	10932	31.53	78
scaffold_904	10930	32.63	122
NODE_846_length_10926_cov_53.136142	10926	36.12	129
scaffold_18551	10922	34.92	110
scaffold_12925	10919	35	126
scaffold_9576	10918	34.21	120
NODE_783_length_11203_cov_55.008988	10912	29.38	156
NODE_810_length_11100_cov_45.288941	10903	38.33	100
scaffold_10271	10893	34.43	144
NODE_856_length_10893_cov_27.343195	10893	34.94	104
scaffold_9062	10889	37.45	101
NODE_814_length_11081_cov_47.384497	10888	35.38	115
scaffold_8823	10883	34.51	109
scaffold_11272	10880	37.73	110
scaffold_11447	10878	37.42	111
NODE_862_length_10876_cov_27.323456	10876	36.08	68
scaffold_12564	10874	37.05	81
scaffold_11831	10873	32.59	133
NODE_863_length_10873_cov_49.714061	10873	35.21	49
scaffold_3754	10872	35.43	112
scaffold_9376	10872	35.54	114
scaffold_10128	10872	32.23	135
NODE_861_length_10879_cov_51.741900	10870	29.48	146
scaffold_5467	10868	30.72	142
scaffold_12071	10863	38.06	94
NODE_867_length_10863_cov_41.511960	10863	31.15	101
scaffold_1546	10861	36.44	112
scaffold_7896	10860	41.48	92
scaffold_16920	10859	35.74	116
scaffold_7650	10858	31.76	129
scaffold_17045	10854	37.64	93
NODE_869_length_10854_cov_44.740002	10854	30.74	104
NODE_870_length_10853_cov_25.856997	10853	32.34	105
scaffold_1876	10851	38.78	111
scaffold_16787	10851	35.66	104
scaffold_14123	10848	32.7	82
scaffold_18663	10848	37.17	97
scaffold_9270	10846	36.89	110
scaffold_14483	10846	37.07	83
scaffold_1226	10843	35.84	116
scaffold_7561	10840	33.6	111
scaffold_545	10838	31.78	143
scaffold_5328	10838	32.88	128
NODE_874_length_10835_cov_48.351088	10835	35.74	117
scaffold_5568	10831	33.84	122
scaffold_1160	10830	36.45	104
scaffold_4996	10818	36.75	104
scaffold_980	10811	34.48	122
scaffold_10942	10811	34.3	123
scaffold_2528	10809	33.36	130
scaffold_4992	10809	34.18	50
NODE_848_length_10916_cov_67.939478	10809	30.56	155
scaffold_8083	10808	34.6	116
scaffold_8347	10806	38.53	110
scaffold_1410	10804	34.7	118
scaffold_81	10803	33.07	134
NODE_878_length_10802_cov_32.378368	10802	32.53	70
scaffold_16240	10797	33.61	119
scaffold_11675	10796	42.29	84
NODE_881_length_10796_cov_23.272905	10796	29.06	52
scaffold_6306	10793	33.46	128
scaffold_13380	10791	36.87	114
scaffold_442	10787	34.16	118
scaffold_790	10784	34	96
scaffold_7300	10783	34.65	113
scaffold_15206	10768	33.81	107
scaffold_3297	10767	37.31	117
scaffold_5038	10767	38.69	104
scaffold_10853	10764	31.78	142
NODE_885_length_10764_cov_54.880135	10764	29.37	140
scaffold_13962	10749	32.72	120
NODE_888_length_10749_cov_37.585364	10749	31.71	78
scaffold_16647	10744	35.8	106
scaffold_8247	10743	38.64	103
scaffold_6220	10742	33.68	63
scaffold_12160	10739	34.11	85
NODE_889_length_10738_cov_56.580996	10738	31.17	148
scaffold_4478	10737	37.72	104
scaffold_8929	10737	32.82	137
NODE_843_length_10933_cov_45.650608	10736	38.86	101
scaffold_1889	10732	39.85	86
scaffold_16526	10730	32.33	111
scaffold_7903	10728	34.81	111
scaffold_5466	10726	38.31	83
scaffold_10546	10723	38.73	111
scaffold_1412	10719	33.85	123
scaffold_6765	10712	36.4	106
NODE_851_length_10908_cov_56.293482	10712	29.27	151
NODE_891_length_10712_cov_25.260624	10712	31.19	55
scaffold_6529	10711	34	128
scaffold_3135	10695	35.32	133
scaffold_8785	10694	31.66	134
scaffold_3437	10690	34.7	56
scaffold_12118	10688	33.29	114
NODE_896_length_10688_cov_34.054660	10688	32.11	63
scaffold_5235	10686	38.83	92
scaffold_12042	10686	34.88	110
scaffold_11678	10683	36.19	94
scaffold_316	10681	33.41	119
scaffold_1961	10678	36.06	101
scaffold_4502	10676	35.55	111
scaffold_13452	10675	36.94	114
scaffold_5178	10672	33.1	111
scaffold_369	10670	30.16	147
scaffold_11311	10667	38.26	111
NODE_866_length_10863_cov_44.184279	10667	36.95	114
scaffold_1631	10664	36.71	101
NODE_868_length_10858_cov_54.560894	10659	31.09	139
scaffold_6119	10657	33.55	124
NODE_905_length_10652_cov_49.906478	10652	34.56	148
scaffold_11079	10648	33.2	135
scaffold_17739	10644	30.39	117
scaffold_9	10641	35.93	112
scaffold_5348	10637	35.34	106
scaffold_6672	10633	35.15	114
scaffold_16758	10633	34.32	67
NODE_906_length_10631_cov_50.919477	10631	33.09	107
scaffold_9414	10629	31.65	111
scaffold_15484	10621	40.5	94
scaffold_13842	10620	38.72	105
NODE_849_length_10915_cov_52.181399	10619	31.57	149
scaffold_11193	10613	36.47	100
scaffold_1125	10606	35.69	106
scaffold_16990	10606	32.45	126
scaffold_8845	10596	34.98	117
scaffold_9064	10589	34.01	126
scaffold_3843	10586	36.97	105
NODE_897_length_10681_cov_52.985006	10585	34.47	121
NODE_916_length_10583_cov_71.059960	10583	31.88	94
scaffold_5228	10579	40.61	97
scaffold_13681	10575	35.08	114
scaffold_8005	10571	36.59	117
NODE_919_length_10570_cov_23.979417	10570	36.32	120
scaffold_15559	10569	37.9	105
NODE_920_length_10565_cov_38.549867	10565	36.2	110
scaffold_11602	10564	33.85	63
scaffold_11200	10557	32.24	125
scaffold_8125	10553	35.9	98
scaffold_16421	10551	39.05	98
NODE_838_length_10937_cov_34.390484	10548	39.48	96
scaffold_2251	10544	34.92	99
scaffold_15974	10540	35.62	122
scaffold_4236	10532	36.75	99
scaffold_2564	10526	36.22	105
scaffold_2590	10525	35.51	104
scaffold_15192	10523	34.29	116
scaffold_7721	10520	37.78	107
scaffold_9476	10518	39.42	96
scaffold_4806	10517	33.98	94
scaffold_4658	10508	36.55	106
NODE_910_length_10605_cov_49.837861	10508	34.1	124
NODE_880_length_10795_cov_52.925173	10505	34.37	125
scaffold_2011	10496	36.1	108
NODE_914_length_10589_cov_61.472032	10494	30.94	148
scaffold_17858	10493	29.02	93
scaffold_17840	10488	36.34	124
scaffold_10597	10487	41.38	90
scaffold_14732	10484	39.7	92
NODE_933_length_10483_cov_55.291370	10483	31.45	136
scaffold_3413	10481	38.92	95
NODE_935_length_10473_cov_31.558388	10473	31.27	69
scaffold_3250	10471	34.66	117
scaffold_2568	10469	35.27	85
scaffold_15847	10469	35.29	119
NODE_886_length_10764_cov_54.829512	10468	32.78	144
scaffold_706	10466	36.54	101
NODE_872_length_10847_cov_44.742732	10461	36.9	119
scaffold_1519	10457	41.03	104
scaffold_9742	10456	33.44	90
NODE_924_length_10551_cov_47.548692	10455	38.35	113
scaffold_16797	10453	34.11	124
NODE_937_length_10451_cov_20.043281	10451	44.59	61
scaffold_18634	10450	33.38	116
scaffold_4949	10443	36.96	104
scaffold_4120	10432	38.52	109
scaffold_9430	10432	31.94	148
scaffold_15449	10430	34.35	127
scaffold_15388	10429	37.52	96
scaffold_381	10428	36.89	94
scaffold_10886	10426	32.2	135
scaffold_891	10421	32.85	126
scaffold_15000	10421	32.09	121
scaffold_8806	10419	36.63	109
scaffold_16448	10419	35.77	118
scaffold_14435	10418	36.01	92
scaffold_18440	10416	36.19	115
scaffold_11777	10414	33	130
NODE_942_length_10414_cov_26.150996	10414	33.04	56
scaffold_2054	10411	36.46	124
scaffold_18469	10410	37.41	105
scaffold_1161	10409	33.57	84
NODE_944_length_10409_cov_28.559137	10409	32.77	107
scaffold_3140	10407	36.97	102
scaffold_9529	10403	36.58	113
scaffold_16158	10400	35.23	111
scaffold_10052	10399	33.67	103
NODE_912_length_10598_cov_48.606121	10397	34.63	132
scaffold_13975	10394	38.46	102
scaffold_14272	10393	36.01	131
scaffold_2752	10392	32.02	101
NODE_898_length_10671_cov_51.463092	10384	35.39	120
scaffold_2925	10382	30.4	150
scaffold_8077	10381	40.66	90
scaffold_9711	10381	39.89	90
scaffold_9897	10381	35.15	118
scaffold_12485	10381	36.82	105
scaffold_12397	10373	36.33	109
NODE_952_length_10373_cov_34.915598	10373	33.89	93
scaffold_13537	10372	34.95	109
scaffold_13985	10369	34.19	48
scaffold_3231	10367	38.25	88
NODE_955_length_10361_cov_36.815539	10361	33.99	81
NODE_956_length_10360_cov_37.272683	10360	29.53	82
scaffold_17680	10357	37.28	111
scaffold_16657	10355	33.69	125
scaffold_10822	10347	40.95	96
scaffold_2493	10337	34.87	119
scaffold_5088	10335	33.84	116
scaffold_5864	10327	36.67	95
scaffold_9864	10322	34.32	84
scaffold_17695	10319	36.3	107
scaffold_14834	10318	31.6	82
scaffold_10335	10315	30.82	140
scaffold_18223	10315	35.85	116
scaffold_2260	10312	39.64	109
NODE_967_length_10312_cov_58.193063	10312	32.24	132
NODE_968_length_10312_cov_47.930044	10312	36.01	120
scaffold_10167	10311	37.92	101
[truncated: 95,073 more rows]

## Sheet: mRNA transcriptome mapping
name	length	GC%	median nomax coverage
TRINITY_DN58169_c1_g2_i1	18193	48.86	71
TRINITY_DN58331_c3_g1_i1	18039	45.77	134
TRINITY_DN57856_c1_g1_i1	17445	46.72	79
TRINITY_DN58188_c0_g1_i1	15774	50.15	67
TRINITY_DN57047_c0_g1_i1	15633	50.04	69
TRINITY_DN58314_c3_g1_i1	14827	47.97	155
TRINITY_DN58281_c0_g1_i1	14290	46.98	47
TRINITY_DN58130_c1_g1_i1	14287	46.11	41
TRINITY_DN58297_c1_g1_i1	14197	45.48	69
TRINITY_DN58316_c9_g3_i1	13949	48.8	127
TRINITY_DN58136_c0_g1_i1	13880	45.1	31
TRINITY_DN58243_c1_g1_i1	13705	49.22	34
TRINITY_DN57256_c0_g3_i1	13351	46.4	24
TRINITY_DN58163_c0_g1_i1	13200	40.45	39
TRINITY_DN58182_c3_g2_i1	13155	43.87	119
TRINITY_DN58291_c4_g1_i1	12988	49.07	142
TRINITY_DN58200_c0_g1_i1	12260	47.59	51
TRINITY_DN58308_c7_g1_i1	12090	45.19	45
TRINITY_DN58289_c2_g1_i1	11951	46.7	166
TRINITY_DN58301_c1_g1_i1	11787	50.03	65
TRINITY_DN58004_c0_g1_i1	11711	49.24	74
TRINITY_DN57994_c1_g1_i1	11703	45.61	124
TRINITY_DN58299_c8_g2_i1	11335	46.68	210
TRINITY_DN57660_c0_g2_i1	11154	44.39	20
TRINITY_DN58276_c3_g1_i1	11119	46.86	63
TRINITY_DN58112_c2_g1_i1	11101	48.47	125
TRINITY_DN55635_c0_g2_i1	10906	41.56	65
TRINITY_DN58246_c3_g1_i1	10900	49.01	92
TRINITY_DN58241_c1_g1_i1	10891	48.18	63
TRINITY_DN58056_c0_g1_i1	10812	49.65	33
TRINITY_DN58039_c1_g2_i1	10724	42.48	80
TRINITY_DN58242_c2_g1_i1	10671	49.32	136
TRINITY_DN58260_c0_g1_i1	10514	47.53	63
TRINITY_DN54294_c0_g1_i1	10465	44.7	17
TRINITY_DN58012_c0_g1_i1	10347	45.79	52
TRINITY_DN57904_c0_g1_i1	10271	50.68	21
TRINITY_DN58273_c3_g1_i1	10239	47.84	33
TRINITY_DN57715_c0_g1_i1	10064	45.92	28
TRINITY_DN57730_c0_g1_i1	9937	43.95	24
TRINITY_DN58090_c2_g1_i1	9913	47.38	27
TRINITY_DN57972_c1_g1_i1	9900	48.3	37
TRINITY_DN58168_c0_g1_i1	9839	50.82	51
TRINITY_DN58162_c1_g1_i1	9781	49.92	63
TRINITY_DN57303_c0_g1_i1	9684	44.87	78
TRINITY_DN58255_c2_g1_i1	9611	44.1	36
TRINITY_DN58345_c20_g1_i1	9579	42.62	144
TRINITY_DN58148_c3_g1_i1	9538	50.12	91
TRINITY_DN56896_c0_g1_i1	9459	44.28	92
TRINITY_DN55707_c0_g1_i1	9373	44.96	83
TRINITY_DN57927_c3_g1_i1	9362	49.06	409
TRINITY_DN57009_c0_g1_i1	9338	44.68	32
TRINITY_DN58049_c0_g1_i1	9287	49.28	123
TRINITY_DN57236_c0_g1_i1	9249	45.57	38
TRINITY_DN56179_c0_g1_i1	9191	40.9	25
TRINITY_DN57651_c0_g1_i1	9162	47.49	25
TRINITY_DN58312_c3_g1_i1	9011	49.92	77
TRINITY_DN56137_c0_g1_i1	8755	46.57	99
TRINITY_DN58058_c2_g1_i1	8649	50.34	120
TRINITY_DN58024_c0_g1_i1	8611	49.89	76
TRINITY_DN58140_c1_g1_i1	8567	47.6	149
TRINITY_DN55539_c0_g1_i1	8459	48.01	65
TRINITY_DN48081_c0_g1_i1	8328	44.36	10
TRINITY_DN58064_c0_g2_i1	8277	47.86	62
TRINITY_DN57847_c0_g1_i1	8233	47.98	39
TRINITY_DN58041_c0_g1_i1	8111	48.8	89
TRINITY_DN58165_c3_g1_i1	8065	47.25	51
TRINITY_DN57948_c2_g1_i1	7965	47.23	39
TRINITY_DN56023_c0_g1_i1	7914	43.19	20
TRINITY_DN57989_c3_g1_i1	7858	38.98	486
TRINITY_DN57493_c1_g1_i1	7846	41.7	73
TRINITY_DN56293_c0_g1_i1	7836	46.02	78
TRINITY_DN58033_c2_g1_i1	7759	48.86	57
TRINITY_DN57470_c0_g1_i1	7743	49.64	88
TRINITY_DN57666_c0_g1_i1	7740	43.86	55
TRINITY_DN57969_c1_g1_i1	7666	47.2	61
TRINITY_DN58265_c0_g1_i1	7622	47.15	158
TRINITY_DN57864_c0_g1_i1	7605	47.28	100
TRINITY_DN58294_c7_g2_i1	7605	48.73	213
TRINITY_DN54471_c0_g1_i1	7585	42.1	134
TRINITY_DN56538_c0_g1_i1	7585	44.63	57
TRINITY_DN58078_c1_g1_i1	7524	47.57	156
TRINITY_DN58073_c1_g1_i1	7482	51.43	142
TRINITY_DN56659_c0_g1_i1	7465	43.66	40
TRINITY_DN57794_c0_g2_i1	7364	44.69	106
TRINITY_DN56445_c0_g1_i1	7356	46.32	138
TRINITY_DN57352_c0_g2_i1	7354	44.04	339
TRINITY_DN57046_c0_g1_i1	7306	47.82	27
TRINITY_DN57250_c0_g2_i1	7298	48.84	74
TRINITY_DN58137_c2_g1_i1	7280	51.47	212
TRINITY_DN58028_c1_g1_i1	7276	48.85	84
TRINITY_DN53621_c0_g2_i1	7262	44.01	15
TRINITY_DN58321_c4_g2_i1	7240	54.24	150
TRINITY_DN57662_c1_g2_i1	7234	46	81
TRINITY_DN57226_c0_g2_i1	7224	47.07	83
TRINITY_DN58193_c5_g1_i1	7172	52.05	225
TRINITY_DN57801_c0_g1_i1	7161	49.07	57
TRINITY_DN57019_c0_g1_i1	7096	44.45	73
TRINITY_DN57667_c0_g1_i1	7065	48.04	191
TRINITY_DN57632_c0_g1_i1	7052	50.3	44
TRINITY_DN55635_c0_g1_i1	7050	42.16	15
TRINITY_DN53385_c0_g3_i1	7047	36.44	18
TRINITY_DN52843_c0_g1_i1	7045	46.9	86
TRINITY_DN54101_c0_g1_i1	7034	45.58	88
TRINITY_DN54047_c1_g1_i1	7031	45.74	160
TRINITY_DN57067_c0_g1_i1	7004	42.52	46
TRINITY_DN54585_c0_g1_i1	6920	45.4	48
TRINITY_DN56674_c0_g1_i1	6919	42.04	27
TRINITY_DN55797_c0_g2_i1	6875	41.44	32
TRINITY_DN56793_c1_g1_i1	6858	47.77	71
TRINITY_DN57134_c1_g1_i1	6838	46.07	31
TRINITY_DN56618_c0_g1_i1	6830	44.7	56
TRINITY_DN56631_c0_g1_i1	6813	45.37	96
TRINITY_DN56667_c0_g1_i1	6762	51.26	97
TRINITY_DN57174_c0_g2_i1	6744	44.48	32
TRINITY_DN57271_c0_g1_i1	6709	44.21	101
TRINITY_DN56777_c0_g1_i1	6684	46.51	42
TRINITY_DN54421_c0_g1_i1	6672	42.81	19
TRINITY_DN57387_c0_g1_i1	6634	44.17	109
TRINITY_DN56220_c0_g1_i1	6615	43.78	120
TRINITY_DN49874_c0_g1_i1	6603	32.38	99
TRINITY_DN54937_c0_g1_i1	6601	47.81	67
TRINITY_DN56099_c0_g1_i1	6599	47.54	74
TRINITY_DN56779_c1_g1_i1	6488	47.15	108
TRINITY_DN58272_c2_g1_i1	6479	51.55	263
TRINITY_DN57692_c0_g1_i1	6466	46.47	51
TRINITY_DN56358_c0_g1_i1	6456	45.09	177
TRINITY_DN57888_c1_g1_i1	6434	48.09	197
TRINITY_DN48740_c0_g1_i1	6398	46.36	19
TRINITY_DN50973_c0_g1_i1	6383	44.92	111
TRINITY_DN55859_c0_g2_i1	6374	45.92	77
TRINITY_DN57243_c1_g1_i1	6364	44.83	27
TRINITY_DN50308_c0_g1_i1	6353	35.73	33
TRINITY_DN56858_c0_g2_i1	6349	50.65	115
TRINITY_DN58204_c2_g1_i1	6347	48.87	307
TRINITY_DN50941_c0_g2_i1	6342	47.1	93
TRINITY_DN54802_c0_g2_i1	6337	42.02	60
TRINITY_DN57848_c1_g1_i1	6327	43.53	45
TRINITY_DN57123_c0_g1_i1	6285	44.25	171
TRINITY_DN56644_c0_g1_i1	6278	37.27	19
TRINITY_DN53522_c0_g1_i1	6260	42.78	101
TRINITY_DN57905_c0_g1_i1	6259	41.01	53
TRINITY_DN58116_c0_g1_i1	6254	51.5	145
TRINITY_DN48839_c0_g1_i1	6252	34.09	32
TRINITY_DN57793_c0_g1_i1	6243	43.7	144
TRINITY_DN57747_c0_g1_i1	6228	46.9	73
TRINITY_DN56998_c0_g1_i1	6225	42.94	162
TRINITY_DN56984_c0_g1_i1	6212	44.49	84
TRINITY_DN57937_c3_g1_i1	6201	51.15	356
TRINITY_DN57661_c0_g1_i1	6166	43.06	53
TRINITY_DN58306_c17_g1_i1	6166	35.89	99
TRINITY_DN57944_c1_g1_i1	6115	47.38	142
TRINITY_DN52208_c0_g1_i1	6111	44.69	27
TRINITY_DN55901_c0_g1_i1	6098	46.15	21
TRINITY_DN57310_c0_g1_i1	6093	48.28	96
TRINITY_DN57795_c0_g2_i1	6090	46.37	24
TRINITY_DN55808_c0_g1_i1	6077	44.82	72
TRINITY_DN56434_c0_g1_i1	6076	44.85	116
TRINITY_DN57583_c0_g1_i1	6019	46.37	41
TRINITY_DN53744_c0_g1_i1	5972	46.4	138
TRINITY_DN57809_c1_g1_i1	5971	48.2	82
TRINITY_DN49256_c0_g1_i1	5962	39.16	18
TRINITY_DN57255_c1_g1_i1	5942	46.08	41
TRINITY_DN57946_c2_g1_i1	5931	45.71	60
TRINITY_DN58220_c1_g1_i1	5907	47.5	181
TRINITY_DN54950_c0_g1_i1	5903	46.25	30
TRINITY_DN58344_c17_g1_i1	5891	34.09	81
TRINITY_DN52357_c0_g1_i1	5879	42.34	18
TRINITY_DN57806_c0_g1_i1	5855	49.05	159
TRINITY_DN53338_c0_g2_i1	5847	42.64	19
TRINITY_DN50691_c0_g1_i1	5839	41.05	285
TRINITY_DN53211_c0_g1_i1	5834	44.48	81
TRINITY_DN57421_c0_g1_i1	5831	45.91	150
TRINITY_DN58038_c4_g2_i1	5829	52.68	215
TRINITY_DN55243_c0_g1_i1	5824	48.28	70
TRINITY_DN51413_c0_g1_i1	5817	47.52	68
TRINITY_DN50659_c0_g1_i1	5816	44.96	70
TRINITY_DN55070_c0_g1_i1	5816	45.44	50
TRINITY_DN56913_c0_g1_i1	5815	46.17	81
TRINITY_DN57413_c0_g1_i1	5807	44.43	48
TRINITY_DN46645_c0_g1_i1	5805	43.84	72
TRINITY_DN58284_c2_g1_i1	5796	48.14	102
TRINITY_DN47439_c0_g1_i1	5757	46.78	21
TRINITY_DN54018_c0_g1_i1	5730	46.86	84
TRINITY_DN56406_c0_g1_i1	5725	41.66	79
TRINITY_DN56084_c0_g1_i1	5720	41.8	33
TRINITY_DN49757_c0_g1_i1	5702	44.67	66
TRINITY_DN57240_c1_g1_i1	5698	45.79	52
TRINITY_DN57971_c3_g1_i1	5694	45.89	127
TRINITY_DN57499_c1_g1_i1	5674	45.59	248
TRINITY_DN51228_c0_g1_i1	5663	49.07	67
TRINITY_DN54185_c0_g1_i1	5658	48.06	36
TRINITY_DN58159_c4_g4_i1	5650	41.5	137
TRINITY_DN55444_c0_g1_i1	5641	46.68	39
TRINITY_DN44987_c1_g1_i1	5635	44.72	66
TRINITY_DN58219_c4_g2_i1	5625	48.3	336
TRINITY_DN55987_c0_g1_i1	5623	41.45	46
TRINITY_DN56511_c0_g1_i1	5620	48.22	116
TRINITY_DN56953_c0_g1_i1	5610	43.49	62
TRINITY_DN57412_c0_g1_i1	5593	43.77	159
TRINITY_DN57086_c1_g1_i1	5584	49.02	411
TRINITY_DN57915_c0_g2_i1	5575	49.15	134
TRINITY_DN55256_c0_g1_i1	5574	45.48	37
TRINITY_DN56563_c0_g1_i1	5568	46.89	87
TRINITY_DN43869_c0_g1_i1	5564	46.6	13
TRINITY_DN57921_c1_g1_i1	5557	49.88	181
TRINITY_DN54808_c0_g1_i1	5556	46.29	66
TRINITY_DN55144_c1_g1_i1	5552	48.09	68
TRINITY_DN51976_c0_g1_i1	5548	46.97	19
TRINITY_DN57895_c1_g2_i1	5548	49.69	162
TRINITY_DN53483_c0_g1_i1	5542	45.92	59.5
TRINITY_DN57933_c2_g1_i1	5528	47.68	261
TRINITY_DN52279_c0_g1_i1	5519	44.81	30
TRINITY_DN51258_c0_g1_i1	5506	48.93	120
TRINITY_DN57579_c0_g2_i1	5477	44.95	48
TRINITY_DN55481_c0_g2_i1	5470	46.31	43
TRINITY_DN53610_c0_g1_i1	5452	42.87	127
TRINITY_DN57712_c0_g1_i1	5438	52.21	174
TRINITY_DN55600_c0_g1_i1	5431	46.9	76
TRINITY_DN49243_c0_g1_i1	5414	39.56	65
TRINITY_DN55699_c0_g1_i1	5409	46.09	113
TRINITY_DN57183_c2_g2_i1	5409	47.22	361
TRINITY_DN52808_c1_g1_i1	5407	47.12	104
TRINITY_DN55581_c0_g1_i1	5395	44.62	64
TRINITY_DN57611_c0_g1_i1	5395	45.91	39
TRINITY_DN53774_c0_g1_i1	5372	47.11	185.5
TRINITY_DN53745_c0_g1_i1	5367	47.79	28
TRINITY_DN58263_c15_g2_i1	5365	42.24	42
TRINITY_DN49256_c0_g2_i1	5357	36.85	12
TRINITY_DN52662_c1_g1_i1	5342	43.22	27
TRINITY_DN57136_c0_g1_i1	5332	42.2	64
TRINITY_DN48448_c0_g2_i1	5331	39.9	16
TRINITY_DN56026_c1_g1_i1	5305	47.35	177
TRINITY_DN56698_c0_g1_i1	5290	42.36	97
TRINITY_DN54527_c0_g1_i1	5289	38.17	100
TRINITY_DN55822_c0_g1_i1	5285	48.44	96
TRINITY_DN56530_c0_g2_i1	5283	46.32	120
TRINITY_DN54839_c0_g1_i1	5258	44.86	110
TRINITY_DN57434_c0_g1_i1	5252	48.4	61
TRINITY_DN54494_c2_g1_i1	5249	41.84	58
TRINITY_DN57880_c1_g1_i1	5248	48.51	107
TRINITY_DN55960_c0_g1_i1	5247	50.73	105
TRINITY_DN53805_c0_g1_i1	5234	46.87	20
TRINITY_DN55969_c0_g1_i1	5221	46.91	37
TRINITY_DN55556_c0_g1_i1	5214	49.21	109
TRINITY_DN53752_c0_g1_i1	5212	45.91	35
TRINITY_DN49571_c0_g1_i1	5210	47.49	73
TRINITY_DN55686_c0_g3_i1	5209	42.35	81
TRINITY_DN56062_c0_g1_i1	5204	46.12	117
TRINITY_DN57261_c0_g2_i1	5195	47.26	108
TRINITY_DN53262_c0_g1_i1	5193	43.13	23
TRINITY_DN58250_c6_g1_i1	5189	44.21	67
TRINITY_DN58236_c8_g1_i1	5163	42.82	180
TRINITY_DN57016_c0_g3_i1	5149	44.42	42
TRINITY_DN56598_c0_g1_i1	5145	39.81	121
TRINITY_DN54700_c0_g1_i1	5144	46.44	74
TRINITY_DN56843_c0_g1_i1	5142	48.7	103
TRINITY_DN57382_c0_g1_i1	5133	48.82	65
TRINITY_DN52815_c0_g1_i1	5127	39.2	64
TRINITY_DN54519_c0_g1_i1	5126	43.52	174
TRINITY_DN52212_c8_g1_i1	5124	42.6	24
TRINITY_DN55586_c0_g1_i1	5115	46.08	63
TRINITY_DN55102_c0_g2_i1	5100	44.96	32
TRINITY_DN51281_c0_g1_i1	5099	45.93	65
TRINITY_DN56187_c0_g1_i1	5099	47.73	75
TRINITY_DN55195_c0_g1_i1	5098	38.8	28
TRINITY_DN56730_c0_g1_i1	5098	46.31	74
TRINITY_DN56495_c1_g1_i1	5089	49.44	164
TRINITY_DN55377_c0_g1_i1	5082	46.79	91
TRINITY_DN56343_c0_g1_i1	5075	43.35	226
TRINITY_DN58132_c1_g1_i1	5073	42.5	51
TRINITY_DN58274_c7_g2_i1	5072	48.26	303
TRINITY_DN56696_c0_g1_i1	5069	45.29	157
TRINITY_DN58149_c0_g1_i1	5059	51.1	253
TRINITY_DN52523_c3_g1_i1	5057	44.26	42
TRINITY_DN55525_c0_g3_i1	5057	40.2	79
TRINITY_DN53359_c0_g1_i1	5056	43.26	41
TRINITY_DN55621_c0_g2_i1	5046	40.09	92
TRINITY_DN55952_c0_g1_i1	5039	46.54	113
TRINITY_DN58100_c2_g1_i1	5026	44.63	395
TRINITY_DN56709_c0_g5_i1	5023	45.07	145
TRINITY_DN56576_c0_g1_i1	5018	44.42	83
TRINITY_DN54831_c0_g1_i1	5016	49.06	35
TRINITY_DN51428_c0_g1_i1	5015	45.1	133
TRINITY_DN54069_c0_g1_i1	5013	43.05	22
TRINITY_DN55175_c0_g1_i1	5007	45.84	168
TRINITY_DN56371_c0_g1_i1	5006	44.99	109
TRINITY_DN55538_c0_g1_i1	5003	42.05	219
TRINITY_DN55991_c0_g2_i1	5003	49.13	201
TRINITY_DN54611_c0_g1_i1	4995	42.36	51
TRINITY_DN53980_c0_g1_i1	4989	44.36	107
TRINITY_DN58177_c12_g3_i1	4988	50.9	851
TRINITY_DN55236_c0_g1_i1	4980	41.18	26
TRINITY_DN57307_c0_g1_i1	4978	46.2	53
TRINITY_DN58098_c6_g3_i1	4978	41.4	109
TRINITY_DN58179_c2_g1_i1	4968	45.05	41
TRINITY_DN55622_c0_g1_i1	4967	47.19	263
TRINITY_DN56348_c0_g1_i1	4963	46.58	70
TRINITY_DN45225_c0_g1_i1	4957	41.76	30
TRINITY_DN56927_c1_g2_i1	4948	44.24	568
TRINITY_DN51769_c0_g1_i1	4939	46.87	106
TRINITY_DN56880_c0_g2_i1	4915	44.74	227
TRINITY_DN46766_c0_g1_i1	4907	50.23	15
TRINITY_DN57606_c0_g1_i1	4903	49.81	116
TRINITY_DN54810_c0_g2_i1	4900	48.55	83
TRINITY_DN49493_c0_g1_i1	4897	45.84	18
TRINITY_DN56700_c1_g2_i1	4884	50.06	154
TRINITY_DN55002_c0_g1_i1	4881	47.24	110
TRINITY_DN58123_c3_g1_i1	4875	43.82	281
TRINITY_DN49101_c0_g1_i1	4870	44.97	88
TRINITY_DN53754_c0_g1_i1	4870	44.95	148
TRINITY_DN55472_c0_g1_i1	4852	44.62	256
TRINITY_DN55150_c0_g1_i1	4847	45.6	109
TRINITY_DN55601_c0_g1_i1	4846	43.17	31
TRINITY_DN57089_c0_g1_i1	4840	41.82	178
TRINITY_DN51742_c0_g1_i1	4833	47.38	121
TRINITY_DN49797_c0_g1_i1	4824	46.46	21
TRINITY_DN45432_c0_g1_i1	4817	45.96	10
TRINITY_DN54796_c0_g1_i1	4814	44.99	133
TRINITY_DN53343_c0_g1_i1	4812	47.09	20
TRINITY_DN56150_c0_g1_i1	4807	43.02	30
TRINITY_DN56422_c0_g2_i1	4807	46.77	195
TRINITY_DN43096_c0_g1_i1	4805	44.95	9
TRINITY_DN52545_c0_g1_i1	4804	40.45	100
TRINITY_DN56347_c0_g1_i1	4804	41.11	76
TRINITY_DN56022_c0_g1_i1	4799	42.15	155
TRINITY_DN57959_c3_g1_i1	4793	46.65	120
TRINITY_DN56013_c0_g1_i1	4789	47.36	57
TRINITY_DN54642_c0_g1_i1	4783	43.15	206
TRINITY_DN56098_c0_g1_i1	4781	42.25	116
TRINITY_DN55233_c0_g2_i1	4780	46.3	85
TRINITY_DN55287_c0_g1_i1	4776	45.77	71
TRINITY_DN56787_c0_g1_i1	4774	43.57	91
TRINITY_DN49405_c0_g3_i1	4772	41.35	30
TRINITY_DN58350_c31_g2_i1	4772	36.78	288
TRINITY_DN58084_c0_g2_i1	4771	51.71	81
TRINITY_DN56178_c0_g1_i1	4759	42.64	128
TRINITY_DN55269_c0_g1_i1	4757	44.1	28
TRINITY_DN48810_c0_g1_i1	4755	40.32	212
TRINITY_DN50968_c0_g1_i1	4749	46.07	64
TRINITY_DN50550_c0_g1_i1	4748	44.65	82
TRINITY_DN51520_c0_g1_i1	4746	43.05	13
TRINITY_DN45640_c0_g1_i1	4742	44.41	124
TRINITY_DN54521_c0_g1_i1	4741	45.03	93
TRINITY_DN55063_c0_g1_i1	4741	41.3	35
TRINITY_DN55704_c0_g1_i1	4736	46.66	39
TRINITY_DN54877_c1_g1_i1	4723	38.6	83
TRINITY_DN53482_c0_g1_i1	4720	41.86	98
TRINITY_DN57940_c0_g2_i1	4716	46.71	44
TRINITY_DN57982_c0_g1_i1	4714	45.31	230
TRINITY_DN57703_c0_g1_i1	4713	45.36	182
TRINITY_DN47500_c0_g1_i1	4712	44.72	19
TRINITY_DN56534_c0_g2_i1	4710	42.08	51
TRINITY_DN57254_c0_g1_i1	4709	50.78	162
TRINITY_DN55188_c0_g1_i1	4706	45.56	71
TRINITY_DN49298_c4_g6_i1	4696	35.95	18
TRINITY_DN56184_c0_g1_i1	4695	47.05	51
TRINITY_DN54995_c0_g1_i1	4694	42.86	56
TRINITY_DN55443_c0_g1_i1	4694	49.55	169
TRINITY_DN55679_c1_g1_i1	4694	44.89	131
TRINITY_DN57265_c0_g1_i1	4693	46.81	51
TRINITY_DN48653_c0_g1_i1	4692	43.35	22
TRINITY_DN53935_c0_g2_i1	4689	46.9	91
TRINITY_DN50605_c0_g1_i1	4686	40.16	188
TRINITY_DN57676_c0_g1_i1	4685	46.94	94
TRINITY_DN51914_c0_g1_i1	4678	48.63	103
TRINITY_DN56663_c0_g1_i1	4674	48.18	95
TRINITY_DN47108_c0_g1_i1	4665	45.7	11
TRINITY_DN51820_c0_g1_i1	4663	44.65	73
TRINITY_DN50506_c0_g1_i1	4659	45.5	60
TRINITY_DN58144_c0_g1_i1	4659	47.13	378
TRINITY_DN57102_c1_g2_i1	4654	46.99	155
TRINITY_DN55812_c0_g1_i1	4651	50.59	130
TRINITY_DN50439_c1_g1_i1	4647	43.62	94
TRINITY_DN49548_c0_g1_i1	4643	45.53	14
TRINITY_DN52362_c1_g1_i1	4639	44.73	22
TRINITY_DN49722_c0_g1_i1	4638	43.68	11
TRINITY_DN57399_c0_g1_i1	4630	47.78	38
TRINITY_DN56864_c0_g1_i1	4628	48.14	54
TRINITY_DN52097_c0_g1_i1	4625	45.12	14
TRINITY_DN56686_c0_g1_i1	4623	47.67	49
TRINITY_DN52384_c1_g1_i1	4617	45.12	113
TRINITY_DN53509_c0_g1_i1	4616	47.31	48
TRINITY_DN57873_c0_g1_i1	4608	48.91	251
TRINITY_DN55876_c0_g1_i1	4604	43.51	208
TRINITY_DN57312_c0_g1_i1	4602	50.8	86
TRINITY_DN54774_c0_g1_i1	4600	49	21
TRINITY_DN52430_c0_g1_i1	4599	44.75	51
TRINITY_DN53644_c0_g1_i1	4593	45.87	139
TRINITY_DN54511_c1_g1_i1	4590	41.39	198
TRINITY_DN58127_c0_g1_i1	4579	47.61	52
TRINITY_DN54874_c0_g1_i1	4578	50.09	90
TRINITY_DN51501_c0_g3_i1	4572	43.81	104
TRINITY_DN54493_c0_g1_i1	4570	46.04	81
TRINITY_DN49383_c0_g1_i1	4566	41.24	19
TRINITY_DN56825_c0_g1_i1	4562	45.13	144
TRINITY_DN41085_c0_g1_i1	4558	29.38	25
TRINITY_DN55608_c0_g1_i1	4547	43.85	48
TRINITY_DN57406_c0_g2_i1	4541	44.31	91
TRINITY_DN56472_c0_g1_i1	4540	46.15	42
TRINITY_DN53074_c0_g1_i1	4539	47.24	41
TRINITY_DN50956_c0_g1_i1	4534	45.63	76
TRINITY_DN54923_c0_g1_i1	4528	46.67	108
TRINITY_DN57118_c0_g1_i1	4527	43.65	235
TRINITY_DN55721_c0_g1_i1	4515	45.32	44
TRINITY_DN52203_c1_g1_i1	4512	44.13	25
TRINITY_DN57980_c0_g1_i1	4509	47.97	135
TRINITY_DN57991_c1_g1_i1	4500	50.18	172
TRINITY_DN55678_c0_g1_i1	4496	45.08	155
TRINITY_DN55147_c1_g1_i1	4486	49.26	89
TRINITY_DN55258_c0_g1_i1	4482	45.43	75
TRINITY_DN56245_c0_g1_i1	4474	37.84	21
TRINITY_DN55028_c0_g2_i1	4467	46.81	508
TRINITY_DN55048_c1_g3_i1	4459	41.4	77
TRINITY_DN57375_c1_g2_i1	4459	48.4	141
TRINITY_DN55961_c0_g1_i1	4442	45.99	147
TRINITY_DN57099_c0_g1_i1	4438	49.19	404
TRINITY_DN57443_c2_g2_i1	4438	42.97	83
TRINITY_DN58324_c14_g3_i1	4436	37.35	83
TRINITY_DN54424_c0_g1_i1	4434	40.93	34
TRINITY_DN53918_c0_g1_i1	4431	41.73	82
TRINITY_DN50777_c0_g1_i1	4423	42.26	43
TRINITY_DN58133_c0_g1_i1	4422	53.01	196.5
TRINITY_DN55474_c0_g1_i1	4421	45.17	58
TRINITY_DN54215_c2_g1_i1	4420	44.82	67
TRINITY_DN55549_c1_g2_i1	4410	44.24	230
TRINITY_DN51577_c0_g1_i1	4405	43.95	78
TRINITY_DN56839_c0_g1_i1	4405	43.2	169
TRINITY_DN57717_c2_g1_i1	4404	49.5	149
TRINITY_DN48689_c0_g1_i1	4401	42.33	86
TRINITY_DN47713_c2_g1_i1	4399	42.94	157
TRINITY_DN57381_c0_g1_i1	4394	47.16	95
TRINITY_DN52211_c0_g1_i1	4383	49.56	90
TRINITY_DN53681_c0_g1_i1	4381	41.52	78
TRINITY_DN53448_c1_g1_i1	4379	43.14	31
TRINITY_DN54697_c0_g1_i1	4378	47.01	209.5
TRINITY_DN54036_c0_g1_i1	4370	44.94	141
TRINITY_DN46198_c0_g1_i1	4368	44.28	57
TRINITY_DN56153_c3_g1_i1	4355	44.66	136
TRINITY_DN55848_c0_g2_i1	4348	44.99	31
TRINITY_DN52439_c0_g1_i1	4346	42.61	13
TRINITY_DN53214_c0_g1_i1	4346	41.14	94
TRINITY_DN50538_c0_g1_i1	4340	42.81	65
TRINITY_DN46848_c0_g1_i1	4329	47.05	16
TRINITY_DN52193_c0_g2_i1	4326	48.31	125
TRINITY_DN51130_c0_g1_i1	4323	43.67	32
TRINITY_DN58346_c42_g1_i1	4321	36.82	197
TRINITY_DN53295_c1_g2_i1	4314	37.48	68
TRINITY_DN54846_c0_g1_i1	4312	39.17	135
TRINITY_DN53506_c0_g1_i1	4308	46.61	119
TRINITY_DN56773_c0_g1_i1	4302	34.61	73
TRINITY_DN57302_c0_g2_i1	4302	49.91	113
TRINITY_DN50085_c2_g1_i1	4300	47.53	37
TRINITY_DN54077_c0_g2_i1	4298	44.63	104
TRINITY_DN46465_c0_g1_i1	4293	45.61	21
TRINITY_DN46594_c0_g1_i1	4286	41.88	19
TRINITY_DN47669_c0_g2_i1	4284	45.99	59
TRINITY_DN58303_c3_g3_i1	4284	47.5	87
TRINITY_DN57442_c0_g1_i1	4280	46.99	104
TRINITY_DN53639_c0_g1_i1	4277	44.4	35
TRINITY_DN53885_c0_g1_i1	4274	46.89	119
TRINITY_DN50642_c0_g1_i1	4259	43.65	20
TRINITY_DN42522_c0_g1_i1	4255	45.55	13
TRINITY_DN54552_c0_g1_i1	4252	37.46	448
TRINITY_DN53857_c0_g1_i1	4244	41.28	87
TRINITY_DN55123_c0_g1_i1	4242	43.94	205
TRINITY_DN44037_c0_g1_i1	4238	44.74	69
TRINITY_DN54340_c0_g1_i1	4237	46.97	135
TRINITY_DN55442_c0_g2_i1	4234	45.32	80
TRINITY_DN57479_c0_g2_i1	4233	49.11	179
TRINITY_DN54807_c0_g2_i1	4230	46.15	54
TRINITY_DN55533_c0_g1_i1	4230	48.16	215
TRINITY_DN57298_c0_g3_i1	4229	45.57	271
TRINITY_DN45862_c0_g1_i1	4227	46.72	126
TRINITY_DN49715_c0_g1_i1	4217	44.72	72
TRINITY_DN54979_c0_g1_i1	4215	38.72	59
TRINITY_DN49429_c0_g1_i1	4207	46.54	76
TRINITY_DN48319_c2_g2_i1	4206	44.67	113
TRINITY_DN56328_c0_g2_i1	4205	48.73	44
TRINITY_DN51186_c0_g1_i1	4195	42.65	83
TRINITY_DN53791_c0_g1_i1	4193	45.17	38
TRINITY_DN51199_c0_g1_i1	4192	46.37	37
TRINITY_DN52733_c2_g1_i1	4186	43.22	197
TRINITY_DN49410_c0_g1_i1	4185	44.47	85
TRINITY_DN50454_c0_g1_i1	4182	42.73	118
TRINITY_DN51240_c0_g1_i1	4182	41.03	31
TRINITY_DN56555_c0_g1_i1	4182	48.73	86
TRINITY_DN51121_c1_g1_i1	4175	43.23	108
TRINITY_DN54005_c0_g1_i1	4172	46.52	39
TRINITY_DN56128_c0_g1_i1	4172	45.01	54
TRINITY_DN53275_c0_g1_i1	4169	43.13	37
TRINITY_DN55574_c0_g1_i1	4168	45.11	110
TRINITY_DN49937_c0_g1_i1	4167	43.8	92
TRINITY_DN55128_c0_g3_i1	4166	35.98	7
TRINITY_DN56317_c0_g2_i1	4166	44.07	299
TRINITY_DN49826_c0_g1_i1	4163	44.27	96
TRINITY_DN53352_c0_g1_i1	4161	44.7	91
TRINITY_DN52446_c0_g1_i1	4158	46.68	20
TRINITY_DN55449_c0_g1_i1	4156	46.2	58
TRINITY_DN55545_c0_g3_i1	4156	45	260
TRINITY_DN53339_c0_g1_i1	4155	46.93	108
TRINITY_DN43081_c0_g1_i1	4149	44.78	12
TRINITY_DN49035_c0_g1_i1	4142	44.25	90
TRINITY_DN57486_c0_g2_i1	4141	46.32	65
TRINITY_DN55930_c0_g3_i1	4137	47.72	107
TRINITY_DN51326_c0_g1_i1	4136	38.44	74
TRINITY_DN57952_c2_g1_i1	4136	48.82	115
TRINITY_DN53666_c0_g1_i1	4133	38.18	45
TRINITY_DN54858_c0_g1_i1	4133	40.14	212
TRINITY_DN51965_c0_g1_i1	4126	45.44	84
TRINITY_DN54209_c0_g1_i1	4126	43.48	59
TRINITY_DN56402_c0_g1_i1	4124	46.36	134
TRINITY_DN53010_c0_g1_i1	4123	44.48	616
TRINITY_DN44957_c0_g1_i1	4121	45.55	75
TRINITY_DN45919_c0_g1_i1	4115	46.32	12
TRINITY_DN57881_c9_g2_i1	4115	51.76	88
TRINITY_DN44519_c0_g1_i1	4114	41.47	7
TRINITY_DN54437_c0_g1_i1	4114	42.81	97
TRINITY_DN54899_c2_g2_i1	4113	46	521
TRINITY_DN46542_c0_g1_i1	4110	43.92	17
TRINITY_DN54234_c0_g1_i1	4110	45.38	125
TRINITY_DN57026_c0_g1_i1	4110	40.44	172
TRINITY_DN58077_c1_g2_i1	4110	46.74	153
TRINITY_DN57560_c0_g1_i1	4107	46.36	100
TRINITY_DN53450_c0_g1_i1	4105	43.46	86
TRINITY_DN50354_c0_g1_i1	4104	41.47	137
TRINITY_DN56042_c0_g2_i1	4104	42.86	169
TRINITY_DN54678_c0_g1_i1	4102	42.37	100.5
TRINITY_DN54255_c1_g1_i1	4098	43.12	265
TRINITY_DN47247_c0_g1_i1	4097	43.3	80
TRINITY_DN50304_c0_g1_i1	4092	45.65	27
TRINITY_DN47755_c0_g1_i1	4089	45.07	184
TRINITY_DN51585_c0_g1_i1	4088	43.3	52
TRINITY_DN56258_c0_g1_i1	4088	39.9	75
TRINITY_DN51009_c0_g1_i1	4085	35.15	58
TRINITY_DN51479_c0_g1_i1	4085	42.11	64
TRINITY_DN53835_c0_g1_i1	4084	43.68	138
TRINITY_DN54094_c0_g1_i1	4080	45.22	101
TRINITY_DN47955_c0_g1_i1	4078	46.15	76
TRINITY_DN54145_c0_g2_i1	4077	38.56	274
TRINITY_DN49224_c3_g1_i1	4076	40.24	147
TRINITY_DN57343_c0_g2_i1	4075	46.18	108
TRINITY_DN49119_c0_g1_i1	4073	46.67	118
TRINITY_DN53548_c0_g2_i1	4072	42.9	99
TRINITY_DN51826_c1_g1_i1	4070	43.64	88
TRINITY_DN57964_c5_g4_i1	4063	46.07	189
TRINITY_DN52560_c0_g1_i1	4057	42.47	139
TRINITY_DN58285_c27_g2_i1	4053	45.03	243
TRINITY_DN55108_c0_g1_i1	4052	43.58	117.5
TRINITY_DN50465_c0_g1_i1	4051	44.8	114
TRINITY_DN55775_c0_g1_i1	4051	43.25	72
TRINITY_DN49476_c2_g1_i1	4048	41.5	74
TRINITY_DN50820_c0_g1_i1	4045	49.1	15
TRINITY_DN56059_c0_g1_i1	4042	41.07	165
TRINITY_DN48336_c0_g1_i1	4037	45.95	95
TRINITY_DN48497_c2_g1_i1	4033	44.88	32
TRINITY_DN53344_c4_g1_i1	4030	46.85	216
TRINITY_DN55791_c0_g1_i1	4029	45.37	90
TRINITY_DN55817_c0_g1_i1	4027	47.21	190
TRINITY_DN56473_c0_g1_i1	4026	47.24	65
TRINITY_DN54433_c0_g1_i1	4024	39.89	83
TRINITY_DN57492_c0_g2_i1	4024	51.74	195
TRINITY_DN54231_c0_g1_i1	4021	42.28	264
TRINITY_DN35362_c0_g1_i1	4005	43.97	11
TRINITY_DN51129_c0_g1_i1	4005	47.24	209
TRINITY_DN50890_c0_g1_i1	4004	43.88	142
TRINITY_DN54334_c0_g1_i1	4003	45.72	49
TRINITY_DN57215_c1_g1_i1	3998	52.08	132
TRINITY_DN57176_c0_g2_i1	3997	45.83	239
TRINITY_DN56123_c0_g1_i1	3996	45.35	144
TRINITY_DN53934_c0_g1_i1	3995	46.98	30
TRINITY_DN45011_c0_g1_i1	3992	41.43	14
TRINITY_DN56890_c0_g2_i1	3992	45.12	74
TRINITY_DN55018_c1_g1_i1	3989	45.78	119
TRINITY_DN47294_c1_g1_i1	3984	47.36	18
TRINITY_DN56138_c3_g1_i1	3978	44.34	47
TRINITY_DN52503_c0_g1_i1	3975	45.91	98
TRINITY_DN55602_c0_g2_i1	3975	45.81	47
TRINITY_DN55437_c2_g1_i1	3974	39.31	87
TRINITY_DN56115_c2_g1_i1	3974	47.91	265
TRINITY_DN53667_c0_g1_i1	3970	47.58	109
TRINITY_DN56430_c1_g1_i1	3966	42.08	33
TRINITY_DN56111_c0_g1_i1	3963	48.12	432
TRINITY_DN57117_c0_g1_i1	3963	49.31	107
TRINITY_DN56537_c0_g1_i1	3959	49.68	34
TRINITY_DN56930_c0_g2_i1	3959	45.92	59
TRINITY_DN57768_c0_g3_i1	3957	47.92	54
TRINITY_DN54062_c0_g1_i1	3955	44.12	38
TRINITY_DN57844_c0_g1_i1	3952	46.96	110
TRINITY_DN54509_c0_g1_i1	3951	46.04	156
TRINITY_DN52258_c0_g1_i1	3950	40.23	44
TRINITY_DN55148_c0_g1_i1	3950	42.48	100
TRINITY_DN52686_c0_g1_i1	3947	43.53	102
TRINITY_DN53861_c1_g1_i1	3947	47.28	194
TRINITY_DN51471_c0_g1_i1	3942	44.39	36
TRINITY_DN52339_c0_g1_i1	3941	39.2	25
TRINITY_DN57749_c1_g1_i1	3940	50.33	137
TRINITY_DN43232_c0_g1_i1	3930	46.51	9
TRINITY_DN52589_c1_g1_i1	3929	42.38	26
TRINITY_DN49866_c0_g1_i1	3928	44.81	45
TRINITY_DN56196_c0_g1_i1	3926	50.15	141
TRINITY_DN55903_c0_g1_i1	3924	43.2	136
TRINITY_DN57084_c0_g1_i1	3924	43.71	191
TRINITY_DN54554_c0_g1_i1	3923	44.1	40
TRINITY_DN57862_c0_g2_i1	3917	44.27	168
TRINITY_DN51350_c0_g1_i1	3915	45.87	31
TRINITY_DN51398_c2_g1_i1	3914	41.59	19
TRINITY_DN53943_c0_g1_i1	3912	42.64	170
TRINITY_DN57162_c0_g1_i1	3908	43.42	82
TRINITY_DN58044_c1_g1_i1	3908	50.67	203
TRINITY_DN56460_c0_g1_i1	3906	49.23	83
TRINITY_DN56808_c2_g1_i1	3904	45.21	51
TRINITY_DN52916_c0_g1_i1	3902	45.03	136
TRINITY_DN52175_c0_g1_i1	3899	38.8	50
TRINITY_DN58052_c1_g3_i1	3897	48.83	127
TRINITY_DN55302_c0_g1_i1	3896	41.12	130
TRINITY_DN52086_c0_g1_i1	3893	45.52	221
TRINITY_DN57498_c1_g1_i1	3891	46.21	417
TRINITY_DN53301_c0_g1_i1	3890	37.56	143
TRINITY_DN52444_c0_g2_i1	3888	45.96	48
TRINITY_DN55413_c1_g1_i1	3884	42.87	94
TRINITY_DN58208_c20_g4_i1	3883	41.75	106
TRINITY_DN55105_c0_g1_i1	3882	45.03	55
TRINITY_DN58267_c15_g2_i1	3880	40.8	65
TRINITY_DN49578_c0_g1_i1	3879	45.94	25
TRINITY_DN55975_c0_g3_i1	3878	49.23	82
TRINITY_DN52318_c0_g1_i1	3876	43.42	100
TRINITY_DN56146_c1_g1_i1	3874	39.91	186
TRINITY_DN54331_c0_g1_i1	3873	46.4	160
TRINITY_DN54377_c0_g1_i1	3870	45.53	151
TRINITY_DN56940_c0_g1_i1	3869	46.6	150
TRINITY_DN55520_c2_g1_i1	3868	44.31	52
TRINITY_DN54863_c0_g4_i1	3867	50.45	83
TRINITY_DN56702_c0_g1_i1	3865	41.79	146
TRINITY_DN57549_c2_g4_i1	3865	46.78	199
TRINITY_DN50279_c0_g1_i1	3863	45.2	28
TRINITY_DN54104_c0_g2_i1	3858	41.81	121
TRINITY_DN57398_c0_g2_i1	3858	47.23	226
TRINITY_DN50769_c0_g2_i1	3857	43.87	18
TRINITY_DN53141_c0_g2_i1	3850	44.08	24
TRINITY_DN51570_c0_g1_i1	3847	43.28	214
TRINITY_DN50182_c2_g1_i1	3845	37.11	17
TRINITY_DN56938_c0_g1_i1	3845	42.78	256
TRINITY_DN55948_c0_g1_i1	3843	41.53	233
TRINITY_DN50068_c0_g1_i1	3841	46.68	44
TRINITY_DN55540_c0_g1_i1	3841	43.69	233
TRINITY_DN57332_c0_g2_i1	3841	43.27	53
TRINITY_DN57323_c0_g3_i1	3840	48.05	233
TRINITY_DN48632_c0_g1_i1	3839	44.44	36
TRINITY_DN45610_c0_g1_i1	3836	42.21	303
TRINITY_DN51953_c1_g2_i1	3835	41.07	155
TRINITY_DN52018_c0_g1_i1	3835	48.71	120
TRINITY_DN47059_c0_g1_i1	3829	46.41	22
TRINITY_DN57731_c0_g1_i1	3828	49.32	273
TRINITY_DN51330_c0_g1_i1	3827	47.95	62
TRINITY_DN44072_c0_g1_i1	3825	43.37	13
TRINITY_DN49727_c0_g1_i1	3825	43.95	16
TRINITY_DN51662_c0_g1_i1	3825	43.56	84
TRINITY_DN54046_c0_g1_i1	3825	44.13	67
TRINITY_DN50211_c1_g1_i1	3819	42.89	171
TRINITY_DN46783_c0_g1_i1	3816	42.03	214
TRINITY_DN54478_c0_g1_i1	3814	47.61	30
TRINITY_DN47194_c0_g1_i1	3813	47.1	106
TRINITY_DN53498_c0_g2_i1	3811	43.32	22
TRINITY_DN52814_c0_g1_i1	3810	43.81	95
TRINITY_DN45274_c0_g1_i1	3804	39.17	11
TRINITY_DN49030_c0_g1_i1	3802	42.92	97
TRINITY_DN49868_c0_g1_i1	3801	42.67	39
TRINITY_DN54182_c0_g1_i1	3800	38.95	54
TRINITY_DN49270_c1_g1_i1	3798	42.86	137
TRINITY_DN50143_c0_g1_i1	3794	43.25	15
TRINITY_DN44750_c0_g1_i1	3793	46.01	97
TRINITY_DN52037_c0_g2_i1	3779	39.96	51
TRINITY_DN51313_c0_g1_i1	3778	46.85	30
TRINITY_DN56264_c0_g1_i1	3777	40.56	59
TRINITY_DN57979_c2_g1_i1	3776	51.03	156
TRINITY_DN58101_c1_g2_i1	3775	51.13	125
TRINITY_DN49618_c0_g1_i1	3774	45.73	24
TRINITY_DN46643_c2_g1_i1	3769	42.66	120
TRINITY_DN51553_c0_g1_i1	3769	36.88	74
TRINITY_DN53438_c0_g1_i1	3769	45.56	195
TRINITY_DN54756_c2_g1_i1	3769	40.59	59
TRINITY_DN52772_c0_g2_i1	3763	46	52
TRINITY_DN58205_c1_g1_i1	3763	47.7	186
TRINITY_DN57425_c0_g2_i1	3762	48.06	46
TRINITY_DN51876_c0_g1_i1	3759	45.97	73
TRINITY_DN54803_c0_g1_i1	3757	43.86	121
TRINITY_DN45576_c0_g1_i1	3754	43.79	78
TRINITY_DN51480_c0_g1_i1	3754	40.36	44
TRINITY_DN55203_c0_g1_i1	3754	43.15	153
TRINITY_DN48161_c0_g1_i1	3753	40.66	14
TRINITY_DN46509_c0_g1_i1	3751	46.2	28
TRINITY_DN47152_c1_g1_i1	3746	43.14	11
TRINITY_DN50543_c0_g2_i1	3744	36.08	105.5
TRINITY_DN51838_c1_g1_i1	3743	42.29	176
TRINITY_DN55438_c0_g1_i1	3742	47.68	216
TRINITY_DN52928_c1_g1_i1	3739	48.22	146
TRINITY_DN54547_c0_g1_i1	3738	45.88	89
TRINITY_DN54621_c0_g5_i1	3738	42.38	91
TRINITY_DN50309_c0_g1_i1	3737	44.82	126
TRINITY_DN58094_c2_g1_i1	3736	45.34	111
TRINITY_DN56450_c0_g1_i1	3735	48.11	86
TRINITY_DN54510_c0_g1_i1	3729	39.85	40
TRINITY_DN48413_c0_g1_i1	3728	45.55	21
TRINITY_DN50712_c0_g1_i1	3728	41.93	29
TRINITY_DN57115_c0_g2_i1	3728	48.18	113
TRINITY_DN49116_c0_g1_i1	3726	43.26	41
TRINITY_DN51796_c1_g1_i1	3725	40.97	170
TRINITY_DN51002_c0_g1_i1	3723	44.24	77
TRINITY_DN55025_c1_g1_i1	3719	41.3	85
TRINITY_DN53124_c3_g1_i1	3717	44.69	29
TRINITY_DN49627_c3_g1_i1	3714	43.03	18
TRINITY_DN46532_c0_g1_i1	3713	39.08	35
TRINITY_DN49149_c0_g1_i1	3712	43.13	10
TRINITY_DN55459_c0_g2_i1	3710	45.66	217
TRINITY_DN56311_c1_g1_i1	3710	42.05	39
TRINITY_DN46180_c0_g1_i1	3708	36.6	36
TRINITY_DN54045_c0_g1_i1	3707	42.95	31
TRINITY_DN47409_c1_g1_i1	3703	43.18	71
TRINITY_DN50229_c0_g1_i1	3703	43.61	602
TRINITY_DN55247_c0_g1_i1	3703	40.35	85
TRINITY_DN55815_c0_g1_i1	3697	42.12	177
TRINITY_DN55990_c0_g2_i1	3696	45.59	65
TRINITY_DN50067_c0_g1_i1	3695	41.79	24
TRINITY_DN44797_c0_g1_i1	3694	45.18	14
TRINITY_DN55261_c0_g1_i1	3694	42.93	360.5
TRINITY_DN52498_c0_g1_i1	3689	46.63	74
TRINITY_DN53355_c0_g1_i1	3685	40.95	99
TRINITY_DN53955_c0_g1_i1	3685	44.56	84
TRINITY_DN49155_c0_g1_i1	3684	43.11	39
TRINITY_DN58021_c3_g1_i1	3682	46.55	340
TRINITY_DN52839_c0_g1_i1	3681	41.46	53
TRINITY_DN51937_c1_g1_i1	3676	39.04	197
TRINITY_DN48026_c0_g1_i1	3675	42.5	25
TRINITY_DN56889_c0_g1_i1	3675	46.18	122
TRINITY_DN53087_c0_g1_i1	3674	42.92	33
TRINITY_DN57851_c0_g1_i1	3672	46.57	97
TRINITY_DN57327_c1_g1_i1	3670	48.07	65
TRINITY_DN47020_c0_g1_i1	3668	45.47	10
TRINITY_DN57432_c1_g2_i1	3668	48.66	223
TRINITY_DN53152_c0_g1_i1	3667	45.1	35
TRINITY_DN51912_c0_g1_i1	3663	46.66	33
TRINITY_DN52546_c0_g1_i1	3661	43.46	56
TRINITY_DN56894_c1_g1_i1	3661	48.07	190
TRINITY_DN56294_c0_g1_i1	3660	51.99	97.5
TRINITY_DN57151_c1_g2_i1	3658	41.25	184
TRINITY_DN57842_c4_g2_i1	3658	48.47	320.5
TRINITY_DN58258_c1_g1_i1	3657	44.76	309
TRINITY_DN55582_c0_g1_i1	3656	40.67	39
TRINITY_DN56412_c1_g2_i1	3655	47.66	49
TRINITY_DN51698_c0_g1_i1	3652	40.03	71
TRINITY_DN48973_c0_g1_i1	3651	41.85	37
TRINITY_DN45348_c0_g1_i1	3648	44.44	75
TRINITY_DN56080_c0_g2_i1	3647	42.64	57
TRINITY_DN48631_c0_g1_i1	3646	45.26	65
TRINITY_DN10172_c0_g1_i1	3645	34.54	13
TRINITY_DN52323_c0_g2_i1	3641	39.14	45
TRINITY_DN56520_c0_g2_i1	3640	47.55	58
TRINITY_DN57595_c0_g1_i1	3640	46.51	24
TRINITY_DN44643_c0_g1_i1	3638	44.12	11
TRINITY_DN56461_c0_g1_i1	3637	46.19	141
TRINITY_DN45844_c0_g1_i1	3636	47.19	11
TRINITY_DN52926_c0_g1_i1	3635	48.5	110
TRINITY_DN55088_c0_g1_i1	3635	46.41	115
TRINITY_DN55700_c0_g2_i1	3635	44.81	98
TRINITY_DN53078_c0_g1_i1	3634	46.26	219
TRINITY_DN55397_c0_g2_i1	3632	47.16	100
TRINITY_DN54832_c0_g1_i1	3630	45.48	56
TRINITY_DN49311_c0_g1_i1	3629	41.03	146
TRINITY_DN53037_c0_g1_i1	3629	43.95	210
TRINITY_DN57062_c1_g1_i1	3623	44.85	171
TRINITY_DN50208_c0_g1_i1	3622	46.27	29
TRINITY_DN47555_c1_g1_i1	3621	45.32	176
TRINITY_DN52052_c0_g1_i1	3621	42.14	143
TRINITY_DN54984_c0_g2_i1	3619	47.91	94
TRINITY_DN50944_c0_g1_i1	3615	43.13	164
TRINITY_DN48479_c0_g1_i1	3614	44.33	46
TRINITY_DN53858_c0_g1_i1	3613	41.82	33
TRINITY_DN50390_c0_g1_i1	3610	42.33	178
TRINITY_DN49733_c1_g1_i1	3608	45.45	46
TRINITY_DN50644_c0_g1_i1	3606	43.4	31
TRINITY_DN54115_c0_g1_i1	3605	45.38	51
TRINITY_DN52356_c0_g1_i1	3603	44.07	35
TRINITY_DN53785_c1_g1_i1	3601	42.79	71
TRINITY_DN47210_c0_g1_i1	3599	44.07	33
TRINITY_DN53439_c0_g1_i1	3599	47.07	30
TRINITY_DN92590_c0_g1_i1	3598	45.16	9
TRINITY_DN57437_c0_g2_i1	3597	50.76	134
TRINITY_DN50437_c0_g2_i1	3596	46.38	164
TRINITY_DN44876_c0_g1_i1	3595	41.17	19
TRINITY_DN47350_c1_g2_i1	3595	41.53	31
TRINITY_DN55461_c0_g1_i1	3594	42.24	236
TRINITY_DN52792_c1_g1_i1	3592	42.43	53
TRINITY_DN50365_c0_g1_i1	3590	44.48	158
TRINITY_DN55371_c0_g1_i1	3590	45.52	91
TRINITY_DN56176_c0_g1_i1	3590	45.93	366
TRINITY_DN51383_c1_g1_i1	3589	45.67	97
TRINITY_DN53185_c0_g2_i1	3589	41.52	66
TRINITY_DN53941_c0_g1_i1	3588	41.16	171.5
TRINITY_DN55270_c0_g1_i1	3587	31.47	90
TRINITY_DN55929_c1_g1_i1	3584	43.64	236
TRINITY_DN51264_c0_g1_i1	3582	42.32	47
TRINITY_DN50447_c0_g1_i1	3581	39.93	14
TRINITY_DN51573_c0_g2_i1	3580	44.39	67
TRINITY_DN49478_c0_g1_i1	3576	43.93	127
TRINITY_DN50861_c0_g2_i1	3575	42.46	57
TRINITY_DN56844_c0_g1_i1	3570	46.89	126
TRINITY_DN49080_c0_g1_i1	3568	45.26	172
TRINITY_DN51624_c0_g1_i1	3563	38.93	115
TRINITY_DN43614_c0_g1_i1	3560	37.02	21
TRINITY_DN53600_c0_g1_i1	3560	46.12	167
TRINITY_DN58271_c11_g2_i1	3559	33.38	60
TRINITY_DN44819_c0_g1_i1	3554	43.95	17
TRINITY_DN50499_c0_g1_i1	3554	44.12	44
TRINITY_DN51146_c0_g1_i1	3554	44.37	86.5
TRINITY_DN51980_c0_g2_i1	3554	41.39	149.5
TRINITY_DN55347_c1_g1_i1	3550	42.56	185
TRINITY_DN54175_c0_g1_i1	3548	40.3	36
TRINITY_DN49399_c0_g1_i1	3547	45.62	73
TRINITY_DN52128_c0_g1_i1	3546	49.1	29
TRINITY_DN51722_c0_g1_i1	3544	45.43	78
TRINITY_DN53492_c0_g1_i1	3544	39	41
TRINITY_DN53347_c0_g1_i1	3543	49.82	37
TRINITY_DN53799_c2_g1_i1	3543	42.79	114
TRINITY_DN50862_c0_g2_i1	3542	42.04	86
TRINITY_DN54771_c0_g1_i1	3540	45.73	134
TRINITY_DN54136_c0_g1_i1	3539	44.84	121
TRINITY_DN57262_c0_g4_i1	3538	47.88	185
TRINITY_DN54166_c0_g1_i1	3537	38.31	81
TRINITY_DN54546_c1_g3_i1	3537	44.02	52
TRINITY_DN56379_c0_g1_i1	3537	47.78	117
TRINITY_DN55779_c0_g1_i1	3532	47.71	41
TRINITY_DN53095_c0_g1_i1	3531	42.85	57
TRINITY_DN49444_c4_g1_i1	3529	41.34	18
TRINITY_DN53209_c0_g1_i1	3528	44.78	114
TRINITY_DN50607_c0_g1_i1	3527	48.26	93
TRINITY_DN58226_c4_g3_i1	3527	45.65	303
TRINITY_DN54559_c1_g1_i1	3526	45.01	30
TRINITY_DN56584_c1_g1_i1	3525	43.49	148
TRINITY_DN46567_c0_g1_i1	3524	42.65	30
TRINITY_DN51848_c0_g1_i1	3524	49.29	60
TRINITY_DN49246_c0_g1_i1	3517	42.96	143
TRINITY_DN57693_c1_g3_i1	3513	45.72	177
TRINITY_DN53920_c0_g1_i1	3512	46.64	161
TRINITY_DN57681_c1_g1_i1	3510	48.46	54
TRINITY_DN50367_c0_g1_i1	3509	46.45	84
TRINITY_DN54395_c0_g1_i1	3509	42.95	61
TRINITY_DN55334_c1_g1_i1	3509	34.17	42
TRINITY_DN43854_c0_g1_i1	3507	44.85	8
TRINITY_DN52382_c0_g1_i1	3507	45.62	47
TRINITY_DN54727_c0_g1_i1	3507	45.42	134
TRINITY_DN57668_c0_g2_i1	3507	30.65	126
TRINITY_DN52061_c0_g1_i1	3503	46.05	70
TRINITY_DN50988_c0_g1_i1	3501	47.5	159
TRINITY_DN52971_c0_g1_i1	3500	47.29	26
TRINITY_DN47234_c3_g1_i1	3498	44.43	75
TRINITY_DN53245_c0_g1_i1	3497	38.09	41
TRINITY_DN45957_c0_g1_i1	3496	43.94	101
TRINITY_DN50718_c0_g1_i1	3496	47.97	27
TRINITY_DN52039_c0_g1_i1	3496	40.9	32
TRINITY_DN55573_c3_g1_i1	3496	42.25	186.5
TRINITY_DN57554_c0_g4_i1	3493	47.64	79
TRINITY_DN57952_c2_g2_i1	3493	46.03	81
TRINITY_DN51773_c0_g1_i1	3492	41.61	225
TRINITY_DN58328_c5_g2_i1	3490	44.73	68
TRINITY_DN57705_c0_g1_i1	3489	48.32	127
TRINITY_DN51109_c1_g1_i1	3488	43.72	101
TRINITY_DN46833_c0_g1_i1	3486	43.17	96
TRINITY_DN55314_c1_g2_i1	3484	46.61	112
TRINITY_DN55553_c1_g2_i1	3484	48.68	94
TRINITY_DN57045_c0_g1_i1	3483	44.13	67
TRINITY_DN47786_c1_g1_i1	3479	38.14	191
TRINITY_DN44931_c0_g1_i1	3477	41.7	20
TRINITY_DN56288_c0_g1_i1	3477	48.98	113
TRINITY_DN58258_c2_g2_i1	3477	39.37	69
TRINITY_DN46443_c0_g1_i1	3475	37.01	12
TRINITY_DN56644_c0_g2_i1	3475	35.77	22
TRINITY_DN46718_c0_g1_i1	3469	37.22	56
TRINITY_DN54569_c0_g1_i1	3468	46.08	150
TRINITY_DN53940_c0_g1_i1	3463	44.01	198
TRINITY_DN58215_c21_g4_i1	3463	44.96	510
TRINITY_DN50918_c0_g1_i1	3461	41.03	95
TRINITY_DN54555_c0_g1_i1	3458	47.02	29
TRINITY_DN47157_c0_g1_i1	3455	44.46	20
TRINITY_DN54904_c0_g1_i1	3455	45.41	76
TRINITY_DN49809_c3_g1_i1	3454	41.86	290.5
TRINITY_DN50546_c0_g1_i1	3452	44.47	129
TRINITY_DN52785_c0_g1_i1	3452	47.54	155
TRINITY_DN54480_c0_g1_i1	3449	42.88	97
TRINITY_DN52314_c0_g1_i1	3446	40.28	137
TRINITY_DN54237_c0_g1_i1	3445	45.6	234
TRINITY_DN49983_c0_g1_i1	3444	38.88	124
TRINITY_DN55323_c0_g1_i1	3444	42.65	137.5
TRINITY_DN45341_c0_g1_i1	3440	40.67	14
TRINITY_DN52673_c1_g2_i1	3440	46.74	175
TRINITY_DN45148_c0_g1_i1	3439	37.22	17
TRINITY_DN56815_c0_g2_i1	3438	45.72	159
TRINITY_DN51513_c0_g1_i1	3436	41.27	32
TRINITY_DN54256_c0_g1_i1	3436	45.08	42
TRINITY_DN54751_c0_g1_i1	3435	44.98	113
TRINITY_DN50873_c0_g1_i1	3434	44.82	80
TRINITY_DN48896_c0_g1_i1	3433	45.21	108
TRINITY_DN51678_c10_g1_i1	3432	39.39	25
TRINITY_DN55328_c1_g1_i1	3432	45.28	54
TRINITY_DN57857_c1_g1_i1	3432	48.16	203
TRINITY_DN58221_c3_g1_i1	3432	44.64	101
TRINITY_DN53120_c5_g2_i1	3431	41.47	152
TRINITY_DN54948_c0_g1_i1	3431	45.7	70
TRINITY_DN47183_c3_g1_i1	3429	44.77	21
TRINITY_DN58093_c2_g1_i1	3428	49.12	203
TRINITY_DN48118_c0_g1_i1	3425	44.18	100
TRINITY_DN53424_c1_g1_i1	3424	35.11	43
TRINITY_DN46201_c0_g1_i1	3423	43.41	163
TRINITY_DN56463_c1_g2_i1	3423	45.81	170
TRINITY_DN54099_c3_g1_i1	3419	45.8	361
TRINITY_DN52085_c0_g1_i1	3418	39.47	83
TRINITY_DN57529_c0_g2_i1	3417	47.61	61
TRINITY_DN57931_c2_g4_i1	3415	47.79	414
TRINITY_DN50827_c0_g2_i1	3414	44.64	162
TRINITY_DN56838_c1_g1_i1	3414	46.43	256
TRINITY_DN50259_c2_g1_i1	3413	45.47	14
TRINITY_DN54467_c1_g1_i1	3413	41.61	74
TRINITY_DN58048_c0_g2_i1	3412	47.04	325
TRINITY_DN54545_c0_g1_i1	3411	44.27	54
TRINITY_DN46836_c0_g1_i1	3410	42.23	28
TRINITY_DN52737_c0_g1_i1	3409	44.65	148
TRINITY_DN48121_c0_g2_i1	3408	44.98	224.5
TRINITY_DN52596_c0_g3_i1	3408	42.9	166
TRINITY_DN49097_c0_g1_i1	3407	37.89	160
TRINITY_DN57629_c1_g2_i1	3407	44.88	265
TRINITY_DN54236_c0_g1_i1	3403	44.05	142
TRINITY_DN44555_c0_g1_i1	3402	42.83	21
TRINITY_DN53743_c0_g1_i1	3402	44.59	42
TRINITY_DN54320_c0_g1_i1	3402	44.62	70
TRINITY_DN45019_c0_g1_i1	3401	33.02	33
TRINITY_DN56486_c0_g1_i1	3400	45.56	68
TRINITY_DN55810_c0_g1_i1	3399	44.48	59
TRINITY_DN49260_c0_g1_i1	3398	37.88	37
TRINITY_DN44762_c0_g1_i1	3397	42.83	22
TRINITY_DN53252_c0_g1_i1	3397	47.39	60
TRINITY_DN58065_c10_g4_i1	3396	42.46	803
TRINITY_DN48439_c0_g1_i1	3391	47.8	17
TRINITY_DN56829_c0_g1_i1	3388	46.78	54
TRINITY_DN51951_c0_g1_i1	3387	44.43	205
TRINITY_DN51930_c0_g1_i1	3386	44.92	101
TRINITY_DN56547_c2_g1_i1	3386	41.52	85
TRINITY_DN102452_c0_g1_i1	3385	34.45	7
TRINITY_DN53465_c0_g1_i1	3385	45.73	31
TRINITY_DN54373_c0_g1_i1	3383	42.42	200
TRINITY_DN46817_c0_g2_i1	3381	43.54	96
TRINITY_DN54476_c0_g1_i1	3380	43.02	94
TRINITY_DN57857_c1_g2_i1	3380	46.95	89
TRINITY_DN53484_c2_g1_i1	3377	42.55	243
TRINITY_DN54440_c0_g1_i1	3377	40.72	250
TRINITY_DN54922_c0_g1_i1	3376	50.27	105
TRINITY_DN51590_c0_g1_i1	3375	42.34	68
TRINITY_DN51018_c0_g1_i1	3374	46.21	86
TRINITY_DN57445_c0_g1_i1	3374	47.9	128
TRINITY_DN55575_c0_g1_i1	3372	44.22	53
TRINITY_DN36712_c0_g1_i1	3369	42.95	10
TRINITY_DN57002_c0_g1_i1	3369	44.43	288
TRINITY_DN57438_c0_g1_i1	3367	47.91	75
TRINITY_DN52041_c1_g1_i1	3366	47.65	90
TRINITY_DN52325_c3_g1_i1	3366	40.49	190
TRINITY_DN53827_c0_g1_i1	3365	43.33	103
TRINITY_DN48051_c0_g1_i1	3364	40.58	93
TRINITY_DN52764_c0_g1_i1	3362	39.86	78
TRINITY_DN54878_c1_g1_i1	3361	43.65	166
TRINITY_DN52145_c0_g1_i1	3359	39.09	29
TRINITY_DN55695_c0_g1_i1	3359	41.62	321
TRINITY_DN56375_c0_g1_i1	3355	46.53	137
TRINITY_DN47616_c0_g1_i1	3352	40.24	28
TRINITY_DN56416_c0_g2_i1	3352	43.17	38
TRINITY_DN46811_c0_g1_i1	3350	39.61	99
TRINITY_DN57566_c0_g3_i1	3349	49.72	179
TRINITY_DN52900_c0_g1_i1	3348	49.1	66
TRINITY_DN53162_c0_g2_i1	3348	47.58	160
TRINITY_DN49319_c0_g1_i1	3347	39.92	194
TRINITY_DN50879_c0_g1_i1	3347	48.22	24
TRINITY_DN52465_c0_g1_i1	3346	43.9	77
TRINITY_DN55604_c0_g1_i1	3345	44.9	141
TRINITY_DN51626_c0_g1_i1	3344	34.42	51
TRINITY_DN51421_c0_g1_i1	3342	37.19	158.5
TRINITY_DN51947_c0_g1_i1	3342	47.97	22
TRINITY_DN53192_c1_g1_i1	3342	48.26	29
TRINITY_DN55172_c2_g1_i1	3341	45.02	36
TRINITY_DN43360_c1_g1_i1	3339	42.77	7
TRINITY_DN49520_c0_g1_i1	3338	43.89	150
TRINITY_DN52645_c0_g1_i1	3337	41.05	85
TRINITY_DN56606_c2_g3_i1	3337	44.59	99
TRINITY_DN42158_c0_g1_i1	3335	41.65	25
TRINITY_DN52229_c0_g1_i1	3335	42.37	45
TRINITY_DN41555_c0_g1_i1	3334	37.31	18
TRINITY_DN43040_c0_g1_i1	3333	42.48	7
TRINITY_DN51395_c0_g1_i1	3333	40.95	74
TRINITY_DN55343_c2_g2_i1	3333	43.86	65
TRINITY_DN48722_c0_g1_i1	3332	42.14	18
TRINITY_DN50192_c0_g1_i1	3327	45.81	106
TRINITY_DN45087_c0_g1_i1	3326	50.6	79
TRINITY_DN50281_c0_g2_i1	3326	44.41	293
TRINITY_DN50553_c0_g1_i1	3326	39.06	30
TRINITY_DN54126_c0_g1_i1	3325	46.59	47
TRINITY_DN58030_c2_g2_i1	3325	47.58	103
TRINITY_DN57194_c0_g1_i1	3324	45.13	210
TRINITY_DN47359_c0_g1_i1	3323	45.32	83
TRINITY_DN48141_c0_g1_i1	3322	44.61	30
TRINITY_DN50825_c3_g2_i1	3321	46.49	81
TRINITY_DN50891_c0_g1_i1	3321	47.94	141
TRINITY_DN55536_c1_g1_i1	3319	37.6	172
TRINITY_DN50110_c0_g1_i1	3318	41.05	87
TRINITY_DN50849_c0_g1_i1	3315	35.26	37
TRINITY_DN52019_c0_g1_i1	3315	44.25	71
TRINITY_DN54566_c0_g1_i1	3315	39.52	106
TRINITY_DN47806_c0_g1_i1	3314	42.61	70
TRINITY_DN48778_c0_g2_i1	3314	43.57	140
TRINITY_DN42110_c0_g2_i1	3312	36.47	17
TRINITY_DN48823_c0_g1_i1	3310	40.42	50
TRINITY_DN50340_c1_g3_i1	3310	36.16	10
TRINITY_DN57394_c0_g2_i1	3306	44.92	428
TRINITY_DN50023_c0_g1_i1	3305	48.96	97
TRINITY_DN54685_c0_g1_i1	3302	42.49	89
TRINITY_DN52766_c0_g1_i1	3300	42.03	211
TRINITY_DN48407_c1_g2_i1	3299	36.01	95
TRINITY_DN54853_c0_g1_i1	3298	43.15	72
TRINITY_DN55300_c6_g1_i1	3298	38.93	10
TRINITY_DN56882_c0_g1_i1	3298	42.18	115
TRINITY_DN45418_c0_g1_i1	3297	41.22	16
TRINITY_DN48460_c0_g1_i1	3297	41.46	29
TRINITY_DN58152_c4_g3_i1	3295	47.89	343
TRINITY_DN54529_c0_g1_i1	3291	45.24	111
TRINITY_DN56694_c0_g1_i1	3291	48.56	41
TRINITY_DN58178_c7_g1_i1	3287	48.89	46
TRINITY_DN52309_c0_g1_i1	3285	41.89	38
TRINITY_DN43772_c0_g1_i1	3284	35.57	15
TRINITY_DN44429_c0_g1_i1	3284	37.85	11
TRINITY_DN50473_c0_g1_i1	3284	42.39	66
TRINITY_DN54291_c0_g1_i1	3282	44.88	179
TRINITY_DN56490_c0_g3_i1	3282	40.34	137
TRINITY_DN54749_c0_g1_i1	3280	41.62	168
TRINITY_DN48572_c2_g1_i1	3279	41.99	22
TRINITY_DN52601_c0_g3_i1	3275	41.1	36
TRINITY_DN44025_c0_g1_i1	3274	40.23	46
TRINITY_DN55468_c1_g1_i1	3274	40.04	208
TRINITY_DN56180_c0_g1_i1	3273	45.83	240
TRINITY_DN49790_c0_g1_i1	3271	45.31	190
TRINITY_DN42714_c0_g1_i1	3270	41.35	8
TRINITY_DN51289_c0_g1_i1	3270	36.67	49
TRINITY_DN53519_c1_g1_i1	3270	42.45	222
TRINITY_DN48353_c0_g1_i1	3268	44.95	105
TRINITY_DN52836_c0_g1_i1	3267	42.03	128
TRINITY_DN53173_c0_g3_i1	3267	41.81	193
TRINITY_DN54040_c0_g1_i1	3266	44.61	129
TRINITY_DN50065_c0_g1_i1	3265	45.39	59
TRINITY_DN53489_c0_g1_i1	3264	43.87	97
TRINITY_DN55637_c1_g1_i1	3263	44.04	38
TRINITY_DN44434_c0_g1_i1	3262	40.96	26
TRINITY_DN56268_c0_g2_i1	3261	45.84	61
TRINITY_DN45467_c0_g1_i1	3254	48	14
TRINITY_DN46892_c0_g1_i1	3254	40.63	80
TRINITY_DN51115_c0_g1_i1	3253	39.44	19
TRINITY_DN57024_c1_g4_i1	3253	46.73	180
TRINITY_DN56604_c3_g2_i1	3250	39.29	85
TRINITY_DN46009_c0_g1_i1	3248	40.12	30
TRINITY_DN46968_c0_g1_i1	3247	45.55	68
TRINITY_DN49008_c0_g1_i1	3246	44.02	61
TRINITY_DN51861_c3_g3_i1	3246	42.73	43
TRINITY_DN58341_c22_g2_i1	3240	44.14	99
TRINITY_DN49802_c0_g1_i1	3239	44.18	191
TRINITY_DN55378_c0_g1_i1	3238	43.11	37
TRINITY_DN58191_c1_g3_i1	3238	44.72	304
TRINITY_DN48885_c0_g1_i1	3237	44.33	115
TRINITY_DN56647_c0_g2_i1	3236	47.53	147
TRINITY_DN44104_c0_g1_i1	3234	42.98	91
TRINITY_DN50264_c1_g1_i1	3234	42.61	67
TRINITY_DN46586_c0_g1_i1	3233	42.62	67
TRINITY_DN49346_c0_g1_i1	3233	41.08	163
TRINITY_DN55718_c0_g1_i1	3232	43.38	122
TRINITY_DN53306_c0_g1_i1	3230	41.33	50
TRINITY_DN55300_c12_g1_i1	3230	44.06	89
TRINITY_DN52500_c0_g1_i1	3229	45.37	125
TRINITY_DN52367_c0_g1_i1	3228	41.51	39
TRINITY_DN52427_c1_g1_i1	3227	48	94
TRINITY_DN41978_c0_g1_i1	3225	43.26	84
TRINITY_DN52257_c0_g1_i1	3225	39.13	56
TRINITY_DN53348_c0_g1_i1	3225	48.71	92
TRINITY_DN57939_c3_g1_i1	3225	42.05	184
TRINITY_DN49472_c0_g1_i1	3224	39.17	26
TRINITY_DN55634_c0_g1_i1	3224	43.61	244
TRINITY_DN49041_c0_g1_i1	3223	42.07	58
TRINITY_DN47349_c0_g1_i1	3222	48.2	24
TRINITY_DN50851_c0_g1_i1	3222	44.54	51
TRINITY_DN53421_c0_g1_i1	3222	43.11	34
TRINITY_DN53693_c0_g1_i1	3222	43.92	249
TRINITY_DN42387_c0_g1_i1	3221	46.01	97
TRINITY_DN57512_c0_g1_i1	3220	43.01	321
TRINITY_DN55724_c0_g1_i1	3219	41.88	76
TRINITY_DN44474_c0_g1_i1	3218	50.37	28
TRINITY_DN52840_c0_g1_i1	3217	44.08	118
TRINITY_DN52978_c0_g1_i1	3217	39.07	159
TRINITY_DN54444_c0_g1_i1	3217	45.32	190
TRINITY_DN46186_c1_g1_i1	3216	38.59	17
TRINITY_DN47710_c0_g1_i1	3214	45.8	27
TRINITY_DN52414_c0_g1_i1	3214	32.92	130
TRINITY_DN54045_c0_g2_i1	3214	44.59	106
TRINITY_DN49584_c0_g1_i1	3210	42.02	286.5
TRINITY_DN52234_c0_g2_i1	3210	46.67	79
TRINITY_DN53665_c0_g1_i1	3210	45.33	158
TRINITY_DN56012_c0_g2_i1	3210	49.07	44
TRINITY_DN45571_c0_g1_i1	3207	48.24	8
TRINITY_DN50738_c0_g1_i1	3207	46.15	173
TRINITY_DN41552_c0_g1_i1	3206	43.48	13
TRINITY_DN48583_c0_g2_i1	3206	43.36	99.5
TRINITY_DN48738_c0_g1_i1	3205	41.09	97
TRINITY_DN53936_c0_g2_i1	3205	41.15	96
TRINITY_DN48627_c0_g3_i1	3204	36.2	135
TRINITY_DN50273_c0_g1_i1	3202	43.72	43
TRINITY_DN57887_c2_g2_i1	3202	46.75	668.5
TRINITY_DN51353_c1_g2_i1	3201	44.64	99
TRINITY_DN54486_c3_g1_i1	3200	42.47	99
TRINITY_DN58234_c7_g1_i1	3200	55.88	160
TRINITY_DN53338_c0_g3_i1	3198	42.9	14
TRINITY_DN51818_c0_g1_i1	3196	43.71	102
TRINITY_DN53384_c0_g1_i1	3196	32.98	10
TRINITY_DN55412_c0_g1_i1	3195	42.66	55
TRINITY_DN52582_c0_g1_i1	3194	42.05	114
TRINITY_DN47764_c0_g1_i1	3193	44.75	47
TRINITY_DN53130_c0_g1_i1	3191	47.23	271
TRINITY_DN50908_c0_g2_i1	3190	42.32	58
TRINITY_DN52628_c0_g1_i1	3189	43.09	63
TRINITY_DN44537_c0_g1_i1	3188	44.26	23
TRINITY_DN43678_c0_g1_i1	3187	38.94	587
TRINITY_DN45356_c0_g1_i1	3187	45.28	113
TRINITY_DN44418_c0_g1_i1	3186	39.61	99
TRINITY_DN51752_c0_g1_i1	3184	42.65	61
TRINITY_DN54435_c0_g1_i1	3184	44.76	233
TRINITY_DN56735_c0_g2_i1	3181	49.54	376
TRINITY_DN40898_c0_g1_i1	3180	37.17	23
TRINITY_DN54004_c0_g1_i1	3180	42.8	127
TRINITY_DN45359_c0_g1_i1	3179	36.43	24
TRINITY_DN51325_c0_g1_i1	3179	45.83	14
TRINITY_DN52950_c0_g2_i1	3178	41.69	31
TRINITY_DN54935_c0_g1_i1	3177	41.14	139
TRINITY_DN45355_c1_g1_i1	3176	37.19	18
TRINITY_DN46339_c1_g1_i1	3175	41.83	15
TRINITY_DN54286_c0_g2_i1	3175	44.66	121
TRINITY_DN51141_c3_g1_i1	3172	31.43	109
TRINITY_DN54039_c0_g1_i1	3172	41.27	50
TRINITY_DN45339_c0_g1_i1	3171	39.86	38
TRINITY_DN57508_c3_g1_i1	3169	49.92	409
TRINITY_DN50107_c2_g1_i1	3168	37.78	32
TRINITY_DN52579_c0_g1_i1	3168	45.8	97
TRINITY_DN49945_c3_g1_i1	3167	39.69	177
TRINITY_DN197_c0_g1_i1	3166	40.21	7
TRINITY_DN57410_c0_g2_i1	3163	48.81	149
TRINITY_DN54686_c0_g1_i1	3162	44.97	103
TRINITY_DN50486_c1_g1_i1	3160	35.09	59
TRINITY_DN44337_c0_g2_i1	3159	41.06	24
TRINITY_DN54679_c0_g1_i1	3159	44.67	67
TRINITY_DN53047_c0_g1_i1	3158	43.7	165
TRINITY_DN56995_c0_g1_i1	3156	43.6	211
TRINITY_DN44763_c0_g1_i1	3154	48.54	15
TRINITY_DN46827_c0_g1_i1	3153	42.53	34
TRINITY_DN53579_c0_g1_i1	3153	47.16	149
TRINITY_DN55098_c0_g1_i1	3153	44.78	169
TRINITY_DN54765_c1_g2_i1	3151	48.37	80
TRINITY_DN49986_c1_g1_i1	3150	45.08	71
TRINITY_DN51859_c0_g1_i1	3150	43.11	94
TRINITY_DN53801_c0_g1_i1	3150	46.48	95
TRINITY_DN47168_c0_g5_i1	3149	39.22	42
TRINITY_DN54454_c1_g1_i1	3149	46.27	79
TRINITY_DN48881_c0_g1_i1	3148	45.33	60
TRINITY_DN51052_c0_g1_i1	3148	45.46	56
TRINITY_DN46196_c0_g1_i1	3147	39.91	146
TRINITY_DN49770_c2_g1_i1	3147	42.01	114
TRINITY_DN51484_c0_g1_i1	3147	45.38	84
TRINITY_DN52452_c0_g1_i1	3147	40.93	155
TRINITY_DN53415_c1_g1_i1	3145	43.91	265
TRINITY_DN44779_c0_g2_i1	3143	33.6	26
TRINITY_DN55445_c1_g2_i1	3143	40.6	46
TRINITY_DN54394_c11_g1_i1	3142	47.42	163
TRINITY_DN46259_c0_g1_i1	3141	44.41	167
TRINITY_DN51596_c0_g1_i1	3141	37.7	128
TRINITY_DN46046_c0_g1_i1	3139	41.86	87
TRINITY_DN53481_c0_g2_i1	3139	42.5	86
TRINITY_DN57371_c0_g3_i1	3139	48.45	323
TRINITY_DN57726_c0_g1_i1	3139	45.49	296
TRINITY_DN47719_c0_g1_i1	3137	45.17	161
TRINITY_DN52886_c0_g2_i1	3137	39.15	21
TRINITY_DN49086_c0_g1_i1	3136	46.33	79
TRINITY_DN46091_c0_g1_i1	3135	45.1	78
TRINITY_DN51961_c1_g1_i1	3135	42.49	72
TRINITY_DN53790_c0_g1_i1	3135	38.76	51
TRINITY_DN51291_c2_g2_i1	3134	47.48	119
TRINITY_DN55242_c2_g4_i1	3133	43.22	70
TRINITY_DN57764_c1_g1_i1	3133	45	236
TRINITY_DN38400_c0_g1_i1	3131	42.77	8
TRINITY_DN56236_c0_g1_i1	3131	47.75	53
TRINITY_DN48162_c0_g1_i1	3130	43.58	51
TRINITY_DN57602_c2_g1_i1	3130	45.69	268
TRINITY_DN51713_c0_g1_i1	3129	47.97	131
TRINITY_DN53131_c0_g1_i1	3129	37.74	59
TRINITY_DN54460_c0_g1_i1	3129	46.53	82
TRINITY_DN47384_c0_g1_i1	3128	40.86	187.5
TRINITY_DN50667_c0_g2_i1	3128	42.97	339
TRINITY_DN55008_c0_g1_i1	3128	43.41	59
TRINITY_DN52872_c1_g2_i1	3127	41.41	63
TRINITY_DN56955_c0_g2_i1	3127	46.56	86
TRINITY_DN56956_c0_g1_i1	3127	43.97	133
TRINITY_DN48312_c0_g1_i1	3126	41.17	86
TRINITY_DN53367_c0_g1_i1	3126	45.71	186.5
TRINITY_DN55968_c0_g1_i1	3124	41.29	142
TRINITY_DN43327_c0_g1_i1	3119	43.92	62
TRINITY_DN54431_c0_g1_i1	3117	41.67	198
TRINITY_DN50468_c0_g2_i1	3113	52.59	157
TRINITY_DN46483_c0_g1_i1	3112	40.17	123
TRINITY_DN54426_c2_g2_i1	3112	40.2	43
TRINITY_DN54734_c0_g3_i1	3111	45.36	169
TRINITY_DN56865_c1_g3_i1	3110	42.83	287
TRINITY_DN51638_c0_g1_i1	3109	46.28	270
TRINITY_DN48427_c0_g1_i1	3108	38.74	33
TRINITY_DN56575_c0_g1_i1	3108	38.77	118
TRINITY_DN47042_c0_g1_i1	3103	41.48	271
TRINITY_DN55253_c1_g1_i1	3103	44.51	261
TRINITY_DN51010_c0_g2_i1	3102	42.42	150
TRINITY_DN52050_c0_g1_i1	3102	47.58	143
TRINITY_DN15372_c0_g1_i1	3101	37.34	9
TRINITY_DN53524_c3_g1_i1	3101	38.08	90
TRINITY_DN46978_c0_g1_i1	3099	40.72	49
TRINITY_DN47759_c1_g1_i1	3099	44.05	119
TRINITY_DN53767_c0_g2_i1	3098	42.48	123
TRINITY_DN55416_c0_g1_i1	3098	45.38	225
TRINITY_DN49899_c0_g1_i1	3097	38.42	34
TRINITY_DN49278_c0_g1_i1	3096	42.99	135
TRINITY_DN51524_c0_g1_i1	3096	45.28	111
TRINITY_DN53410_c0_g1_i1	3096	40.76	56
TRINITY_DN48449_c0_g1_i1	3092	39.68	55
TRINITY_DN51417_c1_g2_i1	3092	33.89	102
TRINITY_DN51727_c0_g1_i1	3092	44.44	37
TRINITY_DN55938_c0_g1_i1	3092	36	52
TRINITY_DN47172_c0_g1_i1	3091	42.93	41
TRINITY_DN56049_c0_g2_i1	3091	46.98	132
TRINITY_DN48607_c0_g1_i1	3090	41.55	200
TRINITY_DN56690_c0_g1_i1	3090	47.93	355
TRINITY_DN53250_c1_g1_i1	3089	45.94	48
TRINITY_DN48458_c0_g1_i1	3087	41.79	182
TRINITY_DN56044_c0_g1_i1	3087	46.97	152
TRINITY_DN52597_c0_g1_i1	3085	45.28	122
TRINITY_DN51825_c0_g1_i1	3083	41.84	54
TRINITY_DN49223_c0_g1_i1	3082	39.84	104
TRINITY_DN56933_c0_g2_i1	3082	38.03	67.5
TRINITY_DN50020_c2_g1_i1	3081	43.78	78
TRINITY_DN53022_c0_g1_i1	3079	35.21	136
TRINITY_DN54669_c0_g1_i1	3078	47.6	231
TRINITY_DN44172_c0_g1_i1	3077	45.66	13
TRINITY_DN53217_c0_g1_i1	3077	46.67	139
TRINITY_DN57273_c0_g2_i1	3077	42.05	256
TRINITY_DN48629_c0_g1_i1	3076	42	55
TRINITY_DN57216_c0_g2_i1	3076	44.18	306
TRINITY_DN57586_c0_g1_i1	3076	45.61	42
TRINITY_DN50570_c0_g1_i1	3075	37.27	27
TRINITY_DN51846_c1_g1_i1	3075	40.59	164
TRINITY_DN52341_c0_g1_i1	3072	44.6	173
TRINITY_DN55219_c0_g2_i1	3072	44.04	378
TRINITY_DN48793_c0_g1_i1	3071	43.24	31
TRINITY_DN54411_c0_g1_i1	3071	42.98	71
TRINITY_DN57941_c0_g2_i1	3069	48.55	329
TRINITY_DN47536_c3_g1_i1	3066	41.85	116
TRINITY_DN57429_c0_g3_i1	3066	46.35	116
TRINITY_DN49341_c0_g1_i1	3065	41.17	91
TRINITY_DN51381_c0_g1_i1	3065	46.3	44
TRINITY_DN53142_c0_g1_i1	3065	44.05	196
TRINITY_DN56818_c0_g1_i1	3064	45.59	57
TRINITY_DN49650_c0_g1_i1	3063	45.94	59
TRINITY_DN51800_c0_g1_i1	3062	45.79	81
TRINITY_DN58160_c0_g2_i1	3062	44.84	484
TRINITY_DN49634_c0_g1_i1	3060	42.71	168
TRINITY_DN51173_c0_g1_i1	3060	36.83	60
TRINITY_DN52291_c0_g1_i1	3059	42.14	118
TRINITY_DN53265_c0_g1_i1	3059	43.71	27
TRINITY_DN51535_c0_g1_i1	3058	46.66	177
TRINITY_DN53472_c4_g2_i1	3058	38.91	169
TRINITY_DN51113_c0_g1_i1	3057	44.03	43
TRINITY_DN52171_c0_g1_i1	3057	38.57	262
TRINITY_DN47238_c1_g1_i1	3056	41.23	11
TRINITY_DN39751_c0_g2_i1	3055	39.51	17
TRINITY_DN48279_c0_g1_i1	3055	43.08	111
TRINITY_DN51968_c0_g1_i1	3055	41.73	100
TRINITY_DN58327_c38_g5_i1	3055	41.51	963
TRINITY_DN40496_c0_g1_i1	3054	44.24	9
TRINITY_DN52153_c0_g1_i1	3053	43.92	34
TRINITY_DN54684_c0_g1_i1	3051	46.15	129
TRINITY_DN45198_c0_g1_i1	3050	47.21	59
TRINITY_DN58318_c22_g2_i1	3050	43.54	172
TRINITY_DN48791_c1_g1_i1	3048	42.26	133
TRINITY_DN52081_c0_g1_i1	3048	48.29	173
TRINITY_DN54041_c0_g1_i1	3048	35.99	87
TRINITY_DN53392_c0_g1_i1	3047	44.24	148
TRINITY_DN56806_c0_g1_i1	3047	42.66	328
TRINITY_DN43964_c0_g1_i1	3046	43.7	107
TRINITY_DN50350_c8_g1_i1	3046	40.18	95
TRINITY_DN50446_c6_g1_i1	3046	42.09	202.5
TRINITY_DN56377_c0_g1_i1	3044	46.09	314
TRINITY_DN47522_c6_g1_i1	3043	42.79	100
TRINITY_DN52833_c0_g1_i1	3043	45.28	146
TRINITY_DN51762_c0_g1_i1	3042	41.55	65
TRINITY_DN57305_c0_g1_i1	3042	50.95	136
TRINITY_DN49323_c0_g1_i1	3041	42.49	124
TRINITY_DN52539_c0_g1_i1	3041	42.58	347
TRINITY_DN47717_c0_g1_i1	3040	39.74	37
TRINITY_DN44978_c0_g2_i1	3039	43.24	128
TRINITY_DN53133_c0_g1_i1	3038	39.66	340
TRINITY_DN53949_c0_g1_i1	3038	39.5	195
TRINITY_DN54158_c1_g1_i1	3038	42.07	222.5
TRINITY_DN54457_c2_g1_i1	3038	43.19	75
TRINITY_DN51000_c0_g1_i1	3037	38.66	164
TRINITY_DN52550_c1_g1_i1	3036	42.75	210
TRINITY_DN51569_c0_g1_i1	3035	42.73	297
TRINITY_DN53253_c0_g1_i1	3034	41.27	134
TRINITY_DN56958_c0_g1_i1	3034	44.33	141
TRINITY_DN57204_c0_g1_i1	3034	45.85	211
TRINITY_DN57909_c0_g2_i1	3033	35.71	40
TRINITY_DN48146_c1_g1_i1	3031	36.56	163
TRINITY_DN58213_c3_g1_i1	3031	35.73	196
TRINITY_DN43262_c0_g1_i1	3030	42.84	13
TRINITY_DN46808_c0_g1_i1	3028	44.58	104
TRINITY_DN43652_c0_g1_i1	3026	44.65	69
TRINITY_DN50445_c0_g2_i1	3026	43.46	33
TRINITY_DN37849_c0_g1_i1	3025	42.51	10
TRINITY_DN47236_c0_g1_i1	3025	44.86	70
TRINITY_DN51641_c2_g1_i1	3025	42.05	52
TRINITY_DN57520_c2_g1_i1	3024	48.88	336
TRINITY_DN57754_c0_g1_i1	3022	45.27	65
TRINITY_DN50129_c0_g1_i1	3021	42.34	24
TRINITY_DN55568_c0_g1_i1	3019	46.07	109
TRINITY_DN93219_c0_g1_i1	3019	37.96	7
TRINITY_DN47605_c0_g1_i1	3018	41.12	39
TRINITY_DN50787_c0_g1_i1	3018	40.16	105
TRINITY_DN56090_c0_g1_i1	3018	36.58	68.5
TRINITY_DN50429_c0_g2_i1	3017	38.12	125
TRINITY_DN42051_c0_g1_i1	3016	41.74	8
TRINITY_DN45512_c0_g1_i1	3016	37.4	20
TRINITY_DN53221_c0_g1_i1	3014	36.1	228.5
TRINITY_DN48907_c0_g1_i1	3013	40.82	122
TRINITY_DN53279_c0_g1_i1	3013	41.82	46
TRINITY_DN56494_c0_g3_i1	3013	45.83	40
TRINITY_DN55489_c1_g2_i1	3012	34.43	24
TRINITY_DN48369_c0_g2_i1	3011	42.31	226
TRINITY_DN50592_c0_g1_i1	3011	38.43	47
TRINITY_DN54767_c0_g1_i1	3011	48.22	38
TRINITY_DN47160_c3_g2_i1	3010	35.65	13
TRINITY_DN49576_c0_g1_i1	3008	39.3	111
TRINITY_DN52676_c0_g1_i1	3008	45.51	186
TRINITY_DN52938_c0_g1_i1	3008	45.41	47
TRINITY_DN57992_c2_g1_i1	3008	47.61	125
TRINITY_DN43029_c0_g1_i1	3006	41.52	15
TRINITY_DN53534_c5_g1_i1	3006	42.48	120
TRINITY_DN45175_c0_g1_i1	3005	39.87	38
TRINITY_DN51466_c0_g1_i1	3005	43.39	18
TRINITY_DN54985_c1_g1_i1	3005	41.8	29
TRINITY_DN55220_c0_g1_i1	3004	38.88	103
TRINITY_DN36024_c0_g1_i1	3001	37.59	26
TRINITY_DN55717_c0_g4_i1	3000	51.53	73
TRINITY_DN40797_c0_g1_i1	2999	44.48	9
TRINITY_DN50073_c0_g1_i1	2998	42.96	98
TRINITY_DN52914_c1_g1_i1	2998	47.26	195
TRINITY_DN54861_c0_g1_i1	2997	43.44	106
TRINITY_DN53202_c0_g1_i1	2996	44.86	141
TRINITY_DN44399_c0_g1_i1	2994	41.55	59
TRINITY_DN51730_c0_g1_i1	2994	41.72	74
TRINITY_DN46994_c0_g1_i1	2993	43.2	42
TRINITY_DN50876_c1_g1_i1	2993	40.33	184
TRINITY_DN53314_c0_g1_i1	2993	42.53	50
TRINITY_DN55994_c1_g1_i1	2992	45.55	175
TRINITY_DN47207_c0_g1_i1	2990	37.19	9
TRINITY_DN55560_c0_g1_i1	2989	42.25	380
TRINITY_DN55613_c0_g1_i1	2989	52.63	511
TRINITY_DN49966_c2_g1_i1	2988	43.67	124
TRINITY_DN45719_c0_g1_i1	2986	38.11	46
TRINITY_DN50814_c0_g1_i1	2985	43.82	61
TRINITY_DN40689_c0_g1_i1	2984	42.73	18
TRINITY_DN55842_c0_g1_i1	2984	51.14	129
TRINITY_DN52803_c0_g1_i1	2983	41.1	109
TRINITY_DN49946_c0_g1_i1	2982	46.04	101
TRINITY_DN50230_c1_g1_i1	2982	38.6	108
TRINITY_DN46094_c0_g1_i1	2980	46.64	31
TRINITY_DN50395_c0_g1_i1	2979	41.59	37
TRINITY_DN58132_c0_g1_i1	2979	45.65	22
TRINITY_DN52714_c1_g1_i1	2977	41.38	67
TRINITY_DN54819_c1_g1_i1	2975	44.34	110
TRINITY_DN53853_c0_g1_i1	2974	46.07	46
TRINITY_DN50361_c0_g1_i1	2971	47.02	67
TRINITY_DN49222_c0_g1_i1	2970	45.32	200
TRINITY_DN51773_c0_g2_i1	2970	41.38	207
TRINITY_DN53720_c2_g1_i1	2970	44.44	109
TRINITY_DN51679_c0_g2_i1	2969	44.53	171
TRINITY_DN53467_c1_g1_i1	2969	42.67	38
TRINITY_DN55305_c0_g1_i1	2969	42.64	265
TRINITY_DN57792_c0_g1_i1	2969	44.06	91
TRINITY_DN50954_c0_g1_i1	2966	38.13	98
TRINITY_DN56058_c0_g2_i1	2966	41.1	379.5
TRINITY_DN56237_c0_g3_i1	2966	42.62	14
TRINITY_DN42578_c0_g1_i1	2965	40.4	11
TRINITY_DN43930_c0_g1_i1	2965	41.69	255
TRINITY_DN45137_c0_g2_i1	2965	30.56	27
TRINITY_DN50378_c1_g1_i1	2965	45.06	106
TRINITY_DN54909_c0_g1_i1	2963	43.64	83
TRINITY_DN54647_c0_g1_i1	2962	42.4	111
TRINITY_DN54719_c0_g1_i1	2962	48.38	192
TRINITY_DN47034_c0_g1_i1	2961	45.76	25
TRINITY_DN50049_c0_g1_i1	2960	40.44	237
TRINITY_DN52927_c0_g1_i1	2960	44.29	50
TRINITY_DN52965_c2_g1_i1	2960	40.64	210
TRINITY_DN53988_c0_g1_i1	2956	43	51
TRINITY_DN52359_c6_g1_i1	2955	49.95	82
TRINITY_DN57763_c6_g1_i1	2955	46.16	663
TRINITY_DN57973_c3_g1_i1	2955	49.04	144
TRINITY_DN55940_c0_g1_i1	2954	50.37	222
TRINITY_DN57925_c7_g6_i1	2954	46.14	1027.5
TRINITY_DN47848_c0_g1_i1	2952	44.21	116
TRINITY_DN53396_c0_g1_i1	2952	43.39	79
TRINITY_DN50613_c0_g1_i1	2951	40.36	110
TRINITY_DN49366_c0_g1_i1	2949	44.18	115
TRINITY_DN51408_c2_g1_i1	2949	41.47	23
TRINITY_DN51819_c0_g1_i1	2947	41.5	44
TRINITY_DN55453_c0_g1_i1	2947	45.1	230
TRINITY_DN51398_c1_g1_i1	2945	35.72	21
TRINITY_DN42773_c0_g1_i1	2944	42.12	26
TRINITY_DN53403_c0_g1_i1	2944	42.02	81
TRINITY_DN56657_c0_g2_i1	2943	51.38	181
TRINITY_DN46255_c0_g1_i1	2939	43.99	16
TRINITY_DN48935_c0_g1_i1	2939	37.22	25
TRINITY_DN46979_c0_g1_i1	2938	45.58	201
TRINITY_DN48996_c0_g1_i1	2938	38.7	93
TRINITY_DN52684_c0_g1_i1	2938	44.38	41
TRINITY_DN57214_c0_g1_i1	2938	47.72	90
TRINITY_DN51550_c0_g1_i1	2937	43.48	307
TRINITY_DN53538_c0_g1_i1	2934	39.33	71
TRINITY_DN54027_c0_g1_i1	2934	41.27	99
TRINITY_DN44016_c0_g1_i1	2933	36.07	16
TRINITY_DN52853_c0_g2_i1	2933	44.19	39
TRINITY_DN58268_c19_g2_i1	2933	40.54	1379
TRINITY_DN47307_c0_g1_i1	2932	41.81	278
TRINITY_DN55494_c1_g4_i1	2932	50.14	52
TRINITY_DN56708_c0_g1_i1	2932	45.02	273.5
TRINITY_DN53012_c0_g1_i1	2931	41.59	35
TRINITY_DN48600_c0_g1_i1	2930	44.33	156
TRINITY_DN53638_c1_g1_i1	2930	41.81	52
TRINITY_DN53268_c0_g1_i1	2929	43.56	19
TRINITY_DN58282_c12_g1_i1	2929	34	36
TRINITY_DN48655_c4_g4_i1	2928	41.33	54
TRINITY_DN49961_c0_g1_i1	2928	43.58	395
TRINITY_DN53205_c0_g1_i1	2926	44.09	604
TRINITY_DN57739_c7_g2_i1	2926	52.26	367
TRINITY_DN44294_c0_g1_i1	2924	39.71	95
TRINITY_DN45852_c0_g1_i1	2924	43.91	13
TRINITY_DN47696_c0_g1_i1	2923	41.74	141
TRINITY_DN51910_c0_g1_i1	2923	44.37	49
TRINITY_DN54338_c0_g1_i1	2922	44.28	71
TRINITY_DN51222_c1_g1_i1	2921	40.53	23
TRINITY_DN55698_c1_g1_i1	2921	45.81	323
TRINITY_DN57184_c1_g1_i1	2921	45.94	189
TRINITY_DN50262_c0_g1_i1	2918	40.58	202
TRINITY_DN48931_c0_g1_i1	2916	40.26	88
TRINITY_DN49921_c0_g2_i1	2915	41.48	92
TRINITY_DN55168_c0_g1_i1	2915	45.59	275
TRINITY_DN44093_c0_g1_i1	2914	43.93	16
TRINITY_DN53160_c0_g1_i1	2910	46.05	48
TRINITY_DN45802_c0_g1_i1	2909	45.38	35
TRINITY_DN53726_c0_g1_i1	2909	41.35	58
TRINITY_DN51732_c0_g1_i1	2907	44.2	151
TRINITY_DN55976_c1_g2_i1	2906	39.99	129
TRINITY_DN56797_c0_g1_i1	2904	47.49	181
TRINITY_DN53154_c0_g1_i1	2902	44.21	229
TRINITY_DN51536_c4_g1_i1	2901	41.5	118
TRINITY_DN57727_c2_g2_i1	2901	45.05	216
TRINITY_DN56809_c1_g1_i1	2900	48.97	467
TRINITY_DN44886_c0_g1_i1	2899	36.87	35
TRINITY_DN54587_c0_g1_i1	2899	44.19	104
TRINITY_DN51831_c0_g1_i1	2898	46.17	232.5
TRINITY_DN40630_c0_g1_i1	2896	34.53	9
TRINITY_DN55482_c1_g1_i1	2896	42.89	291
TRINITY_DN51346_c0_g1_i1	2895	38.45	146
TRINITY_DN57409_c0_g1_i1	2895	47.15	209
TRINITY_DN40381_c0_g1_i1	2894	42.4	13
TRINITY_DN47880_c3_g1_i1	2894	43.37	31
TRINITY_DN55336_c0_g3_i1	2893	42.07	201
TRINITY_DN46263_c0_g2_i1	2892	37.97	30
TRINITY_DN47109_c0_g1_i1	2892	33.09	46
TRINITY_DN48382_c0_g1_i1	2892	34.41	48
TRINITY_DN55599_c0_g1_i1	2891	47.18	297
TRINITY_DN48033_c0_g2_i1	2890	39.34	92.5
TRINITY_DN51785_c0_g1_i1	2889	45.66	137
TRINITY_DN55319_c0_g2_i1	2887	37.58	187
TRINITY_DN58315_c7_g1_i1	2887	45.45	331
TRINITY_DN51188_c0_g1_i1	2886	44.94	113
TRINITY_DN51013_c0_g1_i1	2885	43.74	231
TRINITY_DN52994_c0_g1_i1	2883	42.04	324
TRINITY_DN58057_c1_g1_i1	2883	46.83	500
TRINITY_DN58096_c1_g1_i1	2883	46.1	225
TRINITY_DN49593_c3_g2_i1	2882	35.08	45
TRINITY_DN51347_c2_g1_i1	2881	42	58
TRINITY_DN50529_c0_g1_i1	2880	42.33	27
TRINITY_DN54317_c1_g2_i1	2874	45.44	43
TRINITY_DN53813_c0_g1_i1	2873	40.45	152
TRINITY_DN51396_c0_g1_i1	2872	42.2	38
TRINITY_DN55457_c0_g1_i1	2872	43.04	186
TRINITY_DN56397_c0_g2_i1	2870	44.67	130
TRINITY_DN44836_c0_g1_i1	2869	43.15	99
TRINITY_DN51494_c0_g1_i1	2869	35.8	232
TRINITY_DN55326_c0_g1_i1	2868	49.13	328
TRINITY_DN46552_c0_g1_i1	2866	42.92	134
TRINITY_DN56897_c1_g1_i1	2866	45.5	39
TRINITY_DN50475_c0_g1_i1	2865	45.17	246
TRINITY_DN46204_c0_g1_i1	2864	42.88	23
TRINITY_DN47657_c1_g1_i1	2862	44.65	54
TRINITY_DN53824_c0_g2_i1	2862	41.02	30
TRINITY_DN53066_c0_g1_i1	2861	39.88	133
TRINITY_DN43920_c0_g1_i1	2860	43.99	38
TRINITY_DN58019_c1_g1_i1	2859	45.58	196
TRINITY_DN54252_c0_g1_i1	2857	43.23	150
TRINITY_DN55082_c0_g3_i1	2857	47.6	130
TRINITY_DN56980_c0_g1_i1	2856	47.34	136
TRINITY_DN44857_c0_g1_i1	2854	44.43	79
TRINITY_DN51020_c7_g1_i1	2854	39.7	110
TRINITY_DN53700_c0_g1_i1	2854	39.14	38
TRINITY_DN52875_c0_g1_i1	2853	43.85	62
TRINITY_DN44595_c0_g1_i1	2852	40.85	96
TRINITY_DN46014_c0_g1_i1	2851	44.93	21
TRINITY_DN48203_c0_g1_i1	2851	41.88	15
TRINITY_DN55274_c0_g2_i1	2851	42.72	191
TRINITY_DN51566_c2_g1_i1	2850	40.49	214
TRINITY_DN53702_c0_g2_i1	2850	44.91	167
TRINITY_DN56869_c0_g1_i1	2850	45.44	130
TRINITY_DN47824_c0_g1_i1	2849	36.5	51
TRINITY_DN46843_c0_g1_i1	2848	44.56	82
TRINITY_DN51843_c0_g1_i1	2848	45.4	134
TRINITY_DN46768_c0_g1_i1	2847	38	13
TRINITY_DN53862_c0_g1_i1	2847	48.93	669
TRINITY_DN47031_c0_g1_i1	2846	40.97	14
TRINITY_DN47695_c0_g1_i1	2846	45.12	18
TRINITY_DN45920_c0_g1_i1	2845	41.72	76
TRINITY_DN43820_c0_g1_i1	2844	38.57	22
TRINITY_DN48310_c0_g1_i1	2844	37.9	236
TRINITY_DN48660_c0_g1_i1	2843	44.64	77
TRINITY_DN50842_c0_g1_i1	2842	36.21	104
TRINITY_DN45315_c0_g1_i1	2841	43.51	81
TRINITY_DN45332_c0_g1_i1	2841	30.66	17
TRINITY_DN48795_c0_g1_i1	2841	45.37	133
TRINITY_DN53763_c0_g1_i1	2841	41.11	107
TRINITY_DN55475_c1_g1_i1	2841	37.7	17
TRINITY_DN47881_c0_g1_i1	2840	43.24	30
TRINITY_DN51380_c0_g1_i1	2840	43.98	208
TRINITY_DN54653_c0_g1_i1	2840	40.81	305
TRINITY_DN54786_c0_g1_i1	2840	47.89	132
TRINITY_DN56592_c0_g1_i1	2840	44.89	163
TRINITY_DN57655_c2_g1_i1	2840	30.56	65
TRINITY_DN52676_c0_g2_i1	2838	45.6	98
TRINITY_DN46418_c0_g1_i1	2837	48.36	20
TRINITY_DN52408_c0_g2_i1	2837	41.59	148
TRINITY_DN52924_c2_g2_i1	2836	45.28	40
TRINITY_DN43159_c0_g1_i1	2834	41.28	9
TRINITY_DN52136_c1_g1_i1	2834	44.71	32
TRINITY_DN53231_c3_g1_i1	2834	39.59	230
TRINITY_DN54548_c0_g2_i1	2834	44.95	146
TRINITY_DN58248_c3_g1_i1	2834	56.49	117
TRINITY_DN43057_c1_g1_i1	2833	32.58	28
TRINITY_DN43596_c0_g1_i1	2833	31.13	10
TRINITY_DN48248_c1_g1_i1	2833	35.3	31
TRINITY_DN52388_c0_g1_i1	2832	43.79	55
TRINITY_DN52540_c1_g2_i1	2832	40.25	227
TRINITY_DN50291_c0_g1_i1	2831	49.63	204
TRINITY_DN51224_c0_g1_i1	2830	38.41	35
TRINITY_DN56687_c1_g1_i1	2828	43.07	262
TRINITY_DN56593_c0_g1_i1	2827	46.9	341
TRINITY_DN56679_c1_g1_i1	2827	45.67	247
TRINITY_DN55806_c0_g1_i1	2826	41.65	116
TRINITY_DN44197_c0_g1_i1	2824	37.39	14
TRINITY_DN51074_c0_g1_i1	2824	41.71	132
TRINITY_DN52638_c2_g1_i1	2823	38.33	197
TRINITY_DN46220_c8_g1_i1	2822	42.35	28
TRINITY_DN49683_c0_g1_i1	2822	41.35	25
TRINITY_DN45007_c0_g2_i1	2820	43.01	86
TRINITY_DN50779_c0_g1_i1	2820	46.88	134
TRINITY_DN56834_c0_g2_i1	2820	43.65	180
TRINITY_DN44628_c0_g1_i1	2819	40.09	90
TRINITY_DN56614_c0_g1_i1	2819	42.18	97
TRINITY_DN52458_c0_g1_i1	2818	44.18	103
TRINITY_DN57481_c2_g2_i1	2818	45.03	62
TRINITY_DN30139_c0_g1_i1	2816	38.78	50
TRINITY_DN40253_c0_g1_i1	2815	41.28	40
TRINITY_DN55346_c0_g1_i1	2815	45.36	40
TRINITY_DN45569_c0_g1_i1	2814	37.74	148
TRINITY_DN39716_c0_g1_i1	2813	39.5	128
TRINITY_DN48053_c1_g1_i1	2813	43.05	31
TRINITY_DN46079_c0_g1_i1	2812	41.86	189
TRINITY_DN48774_c0_g1_i1	2811	44.57	72
TRINITY_DN44601_c0_g1_i1	2809	39.3	17
TRINITY_DN44733_c0_g1_i1	2809	38.98	32
TRINITY_DN49521_c0_g1_i1	2809	45.21	135
TRINITY_DN42378_c0_g1_i1	2805	46.17	8
TRINITY_DN49461_c0_g1_i1	2805	35.76	74
TRINITY_DN50752_c0_g1_i1	2805	40.57	157
TRINITY_DN44264_c0_g1_i1	2804	40.8	83
TRINITY_DN51974_c0_g1_i1	2804	40.05	52
TRINITY_DN53427_c0_g1_i1	2804	42.9	31
TRINITY_DN55713_c0_g1_i1	2804	36.41	33
TRINITY_DN46742_c0_g1_i1	2803	37.03	94
TRINITY_DN56105_c0_g2_i1	2803	45.63	36
TRINITY_DN49267_c1_g1_i1	2802	40.83	216
TRINITY_DN55935_c0_g1_i1	2802	44.11	204
TRINITY_DN48140_c2_g1_i1	2801	41.41	88
TRINITY_DN44402_c0_g1_i1	2800	46.39	66
TRINITY_DN53203_c5_g3_i1	2800	42.21	162
TRINITY_DN57914_c4_g1_i1	2800	47.07	190
TRINITY_DN49294_c0_g1_i1	2799	37.51	37
TRINITY_DN54687_c0_g1_i1	2799	45.87	80
TRINITY_DN55792_c0_g1_i1	2797	44.76	152
TRINITY_DN52968_c1_g2_i1	2795	43.65	175
TRINITY_DN57145_c0_g1_i1	2795	38.46	64
TRINITY_DN51607_c0_g1_i1	2793	37.13	159
TRINITY_DN56032_c0_g2_i1	2793	42.68	92
TRINITY_DN42374_c0_g2_i1	2792	48.5	6
TRINITY_DN50245_c0_g1_i1	2792	46.74	19
TRINITY_DN51741_c0_g2_i1	2792	47.85	221
TRINITY_DN51351_c0_g1_i1	2791	42.92	97
TRINITY_DN50330_c3_g1_i1	2787	43.31	104
TRINITY_DN47722_c0_g1_i1	2786	41.92	37
TRINITY_DN49986_c0_g1_i1	2786	43.5	84
TRINITY_DN51776_c0_g1_i1	2786	44.36	268
TRINITY_DN49229_c0_g2_i1	2784	44.22	65
TRINITY_DN53198_c2_g1_i1	2783	47.22	139
TRINITY_DN48646_c0_g1_i1	2782	42.16	17
TRINITY_DN50333_c0_g1_i1	2782	41.12	27
TRINITY_DN48096_c0_g1_i1	2781	38.55	18
TRINITY_DN48346_c0_g1_i1	2781	39.3	91
TRINITY_DN50720_c0_g1_i1	2781	44.12	84
TRINITY_DN53244_c2_g1_i1	2781	46.46	539
TRINITY_DN56624_c0_g2_i1	2781	39.01	61
TRINITY_DN48148_c0_g1_i1	2780	47.66	120
TRINITY_DN51312_c1_g1_i1	2780	45.79	135
TRINITY_DN54248_c0_g1_i1	2780	40.94	277.5
TRINITY_DN58310_c4_g1_i1	2780	34.57	218
TRINITY_DN44178_c0_g1_i1	2779	42.03	20
TRINITY_DN53628_c2_g1_i1	2779	38.68	156
TRINITY_DN51458_c0_g1_i1	2778	35.28	37
TRINITY_DN46407_c0_g1_i1	2777	45.7	128
TRINITY_DN46684_c0_g1_i1	2777	44.47	32
TRINITY_DN47096_c0_g1_i1	2777	44.9	13
TRINITY_DN47550_c0_g1_i1	2777	42.6	13
TRINITY_DN54646_c1_g1_i1	2777	40.04	147
TRINITY_DN54887_c1_g1_i1	2777	46.96	96
TRINITY_DN57775_c3_g1_i1	2777	43.72	232
TRINITY_DN50797_c0_g1_i1	2776	41.93	245
TRINITY_DN57100_c0_g2_i1	2774	47.4	213
TRINITY_DN48452_c0_g1_i1	2773	41.22	34
TRINITY_DN52273_c0_g1_i1	2773	33.83	121
TRINITY_DN57182_c0_g1_i1	2773	46.95	208
TRINITY_DN46449_c0_g1_i1	2770	45.56	33
TRINITY_DN49165_c0_g1_i1	2770	43.65	62
TRINITY_DN54775_c0_g4_i1	2770	47.62	174.5
TRINITY_DN46873_c0_g2_i1	2762	39.93	134
TRINITY_DN51441_c0_g1_i1	2762	40.88	45
TRINITY_DN45625_c0_g1_i1	2761	43.72	150
TRINITY_DN49921_c0_g1_i1	2761	44.01	36
TRINITY_DN55801_c1_g1_i1	2759	41.79	54
TRINITY_DN56766_c0_g5_i1	2759	39.98	38
TRINITY_DN46324_c0_g1_i1	2758	41.26	91
TRINITY_DN55255_c5_g1_i1	2758	39.88	114
TRINITY_DN48850_c0_g1_i1	2757	40.37	17
TRINITY_DN49786_c0_g1_i1	2757	37.69	75
TRINITY_DN51782_c0_g1_i1	2756	47.02	98
TRINITY_DN52818_c0_g2_i1	2755	41.52	60
TRINITY_DN52433_c0_g1_i1	2754	39.03	90
TRINITY_DN48666_c0_g1_i1	2750	40.47	44
TRINITY_DN54134_c0_g1_i1	2750	47.56	158
TRINITY_DN44490_c0_g1_i1	2748	34.86	30
TRINITY_DN56339_c1_g1_i1	2748	43.34	100
TRINITY_DN52218_c0_g1_i1	2747	41.54	44
TRINITY_DN46171_c0_g1_i1	2746	36.82	132
TRINITY_DN56792_c0_g1_i1	2746	45.48	263
TRINITY_DN50566_c0_g1_i1	2743	48.34	163
TRINITY_DN48815_c0_g1_i1	2742	44.93	40
TRINITY_DN50671_c0_g1_i1	2742	45.84	61
TRINITY_DN56928_c0_g1_i1	2742	49.27	152
TRINITY_DN44698_c0_g1_i1	2740	38.91	83.5
TRINITY_DN47386_c0_g1_i1	2740	44.05	99
TRINITY_DN51186_c0_g2_i1	2739	44.69	33
TRINITY_DN49787_c0_g1_i1	2738	41.71	167
TRINITY_DN49813_c0_g1_i1	2738	45.14	154
TRINITY_DN49825_c0_g2_i1	2738	41.23	43
TRINITY_DN49204_c0_g1_i1	2737	42.86	58
TRINITY_DN51788_c0_g1_i1	2737	47.79	180
TRINITY_DN53006_c0_g1_i1	2737	43.22	203
TRINITY_DN46703_c0_g1_i1	2736	42.21	88
TRINITY_DN47859_c1_g1_i1	2736	37.65	226
TRINITY_DN53407_c1_g1_i1	2736	42.69	301
TRINITY_DN50119_c0_g1_i1	2733	38.79	372
TRINITY_DN50355_c0_g1_i1	2733	47.13	193
TRINITY_DN56106_c0_g2_i1	2733	46.25	271
TRINITY_DN56918_c1_g1_i1	2733	45.7	198
TRINITY_DN46917_c0_g1_i1	2732	38.84	157
TRINITY_DN56010_c0_g1_i1	2732	47.04	19
TRINITY_DN54671_c2_g1_i1	2731	36.21	235
TRINITY_DN45629_c0_g1_i1	2730	47.14	18
TRINITY_DN50002_c0_g1_i1	2730	47.36	187
TRINITY_DN48621_c0_g1_i1	2729	41.85	31
TRINITY_DN50410_c0_g1_i1	2728	43.48	21
TRINITY_DN44938_c1_g1_i1	2726	41.71	78
TRINITY_DN51311_c0_g1_i1	2726	42	87
TRINITY_DN53812_c0_g2_i1	2726	45.08	42
TRINITY_DN55038_c0_g1_i1	2724	43.1	272
TRINITY_DN55297_c1_g1_i1	2724	50.66	397
TRINITY_DN54416_c0_g1_i1	2723	44.55	283
TRINITY_DN55451_c0_g2_i1	2723	42.23	323
TRINITY_DN57130_c3_g1_i1	2723	48.7	169
TRINITY_DN55861_c1_g1_i1	2722	45.22	403
TRINITY_DN52879_c0_g2_i1	2720	49.67	113
TRINITY_DN53611_c0_g1_i1	2720	49.38	93
TRINITY_DN47491_c0_g1_i1	2719	41.49	200
TRINITY_DN51214_c0_g1_i1	2719	36.93	33
TRINITY_DN49152_c0_g2_i1	2718	41.65	37
TRINITY_DN54443_c0_g1_i1	2718	49.52	119
TRINITY_DN50552_c1_g2_i1	2717	41	33
TRINITY_DN46747_c0_g1_i1	2716	47.09	40
TRINITY_DN50124_c0_g1_i1	2716	38.84	236
TRINITY_DN50507_c0_g1_i1	2716	42.27	94
TRINITY_DN47411_c1_g2_i1	2715	42.17	64
TRINITY_DN49187_c1_g1_i1	2715	45.64	78
TRINITY_DN50772_c2_g1_i1	2714	43.48	165
TRINITY_DN53891_c0_g1_i1	2714	41.71	154
TRINITY_DN56653_c0_g2_i1	2714	41.64	194.5
TRINITY_DN46685_c2_g1_i1	2712	37.24	25
TRINITY_DN51946_c0_g1_i1	2711	37.92	122
TRINITY_DN53408_c0_g1_i1	2711	44.41	76
TRINITY_DN44974_c0_g1_i1	2710	31.99	13
TRINITY_DN57690_c0_g1_i1	2708	38.55	77
TRINITY_DN50013_c0_g1_i1	2707	46.07	146
TRINITY_DN53089_c0_g1_i1	2706	45.82	113
TRINITY_DN58046_c0_g1_i1	2706	52.29	189
TRINITY_DN54173_c0_g1_i1	2704	42.68	429
TRINITY_DN51649_c0_g1_i1	2703	42.69	85
TRINITY_DN50374_c1_g1_i1	2702	41.78	278
TRINITY_DN46934_c0_g1_i1	2701	40.87	64
TRINITY_DN56495_c0_g1_i1	2701	34.65	172
TRINITY_DN42562_c0_g1_i1	2700	42.63	15
TRINITY_DN50071_c0_g1_i1	2700	41.63	70
TRINITY_DN50700_c0_g2_i1	2700	44.89	81
TRINITY_DN54813_c0_g1_i1	2700	50	69
TRINITY_DN46001_c0_g1_i1	2699	42.2	8
TRINITY_DN52479_c0_g1_i1	2699	39.42	99
TRINITY_DN57540_c0_g2_i1	2699	45.46	123
TRINITY_DN56881_c0_g2_i1	2698	45.7	159
TRINITY_DN48475_c0_g1_i1	2697	43.75	105
TRINITY_DN48478_c0_g1_i1	2697	35.78	23
TRINITY_DN52906_c0_g1_i1	2697	46.76	42
TRINITY_DN55933_c1_g1_i1	2697	45.09	336
TRINITY_DN45789_c0_g1_i1	2696	34.76	12
TRINITY_DN50898_c0_g1_i1	2696	49.3	129
TRINITY_DN50669_c0_g1_i1	2695	44.42	177
TRINITY_DN54439_c1_g1_i1	2695	44.38	9
TRINITY_DN48011_c0_g1_i1	2694	38.94	205
TRINITY_DN54668_c0_g1_i1	2693	44.08	109
TRINITY_DN48163_c0_g1_i1	2692	46.03	87
TRINITY_DN50177_c0_g1_i1	2692	43.28	181
TRINITY_DN46119_c0_g1_i1	2691	42.66	80
TRINITY_DN50059_c0_g1_i1	2691	47.12	258
TRINITY_DN51161_c0_g1_i1	2691	39.5	89
TRINITY_DN50742_c0_g1_i1	2689	41.61	24
TRINITY_DN51832_c0_g1_i1	2688	45.2	148
TRINITY_DN47516_c0_g1_i1	2687	43.69	40
TRINITY_DN50358_c0_g1_i1	2687	42.76	37
TRINITY_DN52181_c0_g1_i1	2686	40.69	303
TRINITY_DN53993_c0_g1_i1	2686	34.81	16
TRINITY_DN47297_c0_g1_i1	2684	44.52	526
TRINITY_DN52121_c0_g1_i1	2684	41.1	34
TRINITY_DN54574_c0_g3_i1	2684	40.5	10
TRINITY_DN41288_c0_g1_i1	2682	43.62	9
TRINITY_DN50298_c2_g1_i1	2682	39.78	55
TRINITY_DN51915_c0_g1_i1	2682	46.09	80
TRINITY_DN56703_c0_g1_i1	2682	43.44	67
TRINITY_DN46168_c0_g1_i1	2681	42.11	15
TRINITY_DN46799_c2_g3_i1	2681	41.44	79
TRINITY_DN50695_c0_g1_i1	2681	43.38	109
TRINITY_DN57701_c1_g1_i1	2681	49.12	218
TRINITY_DN57903_c2_g2_i1	2681	35.43	48
TRINITY_DN47382_c0_g1_i1	2680	41.42	54
TRINITY_DN50310_c0_g1_i1	2680	43.17	104
TRINITY_DN52634_c0_g1_i1	2679	38.15	180
TRINITY_DN53687_c0_g1_i1	2679	49.65	109
TRINITY_DN43787_c0_g1_i1	2678	43.35	196.5
TRINITY_DN45494_c0_g1_i1	2678	40.89	231
TRINITY_DN47099_c0_g1_i1	2678	41	20
TRINITY_DN43378_c0_g1_i1	2677	41.88	19
TRINITY_DN53009_c0_g1_i1	2677	41.61	43
TRINITY_DN39603_c0_g1_i1	2676	44.21	16
TRINITY_DN52607_c0_g2_i1	2676	41.82	208.5
TRINITY_DN53747_c0_g1_i1	2676	49.03	152
TRINITY_DN53307_c0_g2_i1	2675	44.07	27
TRINITY_DN54194_c0_g1_i1	2675	46.65	164
TRINITY_DN54870_c0_g1_i1	2675	48.41	172
TRINITY_DN3700_c0_g1_i1	2673	33.48	6
TRINITY_DN44115_c0_g1_i1	2673	41.68	147
TRINITY_DN46163_c0_g1_i1	2673	43.7	102
TRINITY_DN51058_c0_g1_i1	2673	37.67	85
TRINITY_DN55029_c0_g2_i1	2673	39.92	368
TRINITY_DN57795_c0_g3_i1	2673	47.96	36
TRINITY_DN43136_c0_g1_i1	2671	39.8	21
TRINITY_DN44003_c0_g1_i1	2671	38.26	60
TRINITY_DN46469_c3_g2_i1	2671	36.77	76
TRINITY_DN49400_c0_g1_i1	2671	43.62	110
TRINITY_DN51450_c0_g1_i1	2671	45.04	40
TRINITY_DN58217_c23_g1_i1	2671	39.57	61
TRINITY_DN52075_c0_g1_i1	2670	37.87	69
TRINITY_DN49661_c1_g1_i1	2669	43.61	188
TRINITY_DN50540_c0_g1_i1	2669	42.68	162
TRINITY_DN44607_c0_g1_i1	2667	42.71	154
TRINITY_DN48687_c0_g1_i1	2667	44.92	53
TRINITY_DN56326_c1_g2_i1	2667	41.02	153
TRINITY_DN55843_c0_g1_i1	2666	41.49	86
TRINITY_DN56296_c0_g1_i1	2666	47.04	125
TRINITY_DN54413_c0_g2_i1	2665	35.31	48
TRINITY_DN46982_c0_g1_i1	2664	41.18	36
TRINITY_DN54001_c0_g1_i1	2664	41.22	199
TRINITY_DN52073_c0_g1_i1	2663	40.97	269
TRINITY_DN56286_c0_g1_i1	2663	46.38	251
TRINITY_DN49659_c0_g1_i1	2662	43.05	62
TRINITY_DN52888_c0_g2_i1	2662	41.7	39
TRINITY_DN43556_c0_g1_i1	2661	38.33	40
TRINITY_DN43749_c0_g1_i1	2661	40.17	61
TRINITY_DN56181_c0_g1_i1	2661	33.97	52
TRINITY_DN50010_c0_g1_i1	2659	41.44	163
TRINITY_DN54080_c0_g1_i1	2658	47.93	61
TRINITY_DN47611_c0_g1_i1	2657	41.36	373
TRINITY_DN48220_c0_g1_i1	2657	46.78	143
TRINITY_DN46945_c0_g1_i1	2656	41.11	108
TRINITY_DN46976_c0_g1_i1	2656	43.07	75
TRINITY_DN47728_c0_g1_i1	2656	46.23	61
TRINITY_DN58022_c0_g2_i1	2655	49.3	308
TRINITY_DN52937_c0_g1_i1	2653	44.33	172
TRINITY_DN84045_c0_g1_i1	2653	37.17	12
TRINITY_DN52199_c0_g1_i1	2652	39.25	209
TRINITY_DN1129_c0_g1_i1	2651	37.61	9
TRINITY_DN47949_c0_g1_i1	2651	44.59	19
TRINITY_DN48792_c0_g1_i1	2651	44.66	73
TRINITY_DN50514_c1_g1_i1	2651	40.93	77
TRINITY_DN46457_c0_g1_i1	2649	43.64	49
TRINITY_DN47813_c1_g1_i1	2649	42.62	135
TRINITY_DN46217_c0_g1_i1	2648	36.29	16.5
TRINITY_DN47633_c0_g1_i1	2647	45.03	21
TRINITY_DN54484_c1_g3_i1	2647	50.77	341
TRINITY_DN45730_c0_g1_i1	2646	43.31	22
TRINITY_DN48541_c0_g1_i1	2646	43.05	28
TRINITY_DN50747_c2_g1_i1	2644	37.9	246
TRINITY_DN55550_c0_g4_i1	2642	31.87	35
TRINITY_DN57563_c1_g1_i1	2642	45.69	27
TRINITY_DN48627_c0_g1_i1	2641	35.59	77
TRINITY_DN56850_c0_g1_i1	2641	45.55	38
TRINITY_DN58292_c9_g1_i1	2641	32.83	38
TRINITY_DN58045_c1_g1_i1	2640	49.13	83
TRINITY_DN43616_c0_g1_i1	2639	43.62	9
TRINITY_DN45697_c0_g1_i1	2639	39.75	40
TRINITY_DN58030_c2_g3_i1	2639	51.16	151
TRINITY_DN51491_c0_g1_i1	2638	46.93	19
TRINITY_DN53800_c0_g3_i1	2638	41.43	51.5
TRINITY_DN46480_c0_g1_i1	2637	40.69	169
TRINITY_DN47685_c0_g1_i1	2637	39.97	130
TRINITY_DN57042_c1_g1_i1	2637	52.07	204
TRINITY_DN15071_c0_g1_i1	2636	33.61	7
TRINITY_DN54704_c0_g1_i1	2636	43.02	46
TRINITY_DN51147_c2_g2_i1	2635	46.15	560
TRINITY_DN53653_c0_g1_i1	2635	40.68	118
TRINITY_DN53852_c1_g2_i1	2635	47.06	100
TRINITY_DN49303_c0_g1_i1	2634	44.08	253
TRINITY_DN49999_c9_g2_i1	2634	42.56	279
TRINITY_DN41645_c0_g1_i1	2633	30.16	47
TRINITY_DN48020_c0_g2_i1	2633	43.45	71
TRINITY_DN50951_c0_g1_i1	2633	40.26	37
TRINITY_DN48404_c0_g1_i1	2632	42.97	177
TRINITY_DN58095_c0_g3_i1	2632	46.73	418
TRINITY_DN46890_c2_g1_i1	2628	43.99	88.5
TRINITY_DN49844_c0_g1_i1	2628	43.65	190
TRINITY_DN55747_c0_g1_i1	2628	49.35	234
TRINITY_DN58248_c3_g2_i1	2628	50.38	177.5
TRINITY_DN54439_c2_g1_i1	2627	42.52	107
TRINITY_DN51500_c1_g1_i1	2626	38.65	74
TRINITY_DN46971_c0_g1_i1	2625	44.34	19
TRINITY_DN56134_c1_g1_i1	2625	46.44	142
TRINITY_DN20656_c0_g1_i1	2623	42.97	16
TRINITY_DN55264_c1_g1_i1	2623	36.83	31
TRINITY_DN47061_c0_g1_i1	2622	44.66	24
TRINITY_DN56848_c0_g1_i1	2622	50.08	200.5
TRINITY_DN48670_c1_g1_i1	2621	37.77	36
TRINITY_DN54144_c0_g3_i1	2621	46.24	118
TRINITY_DN44588_c0_g1_i1	2620	41.11	21
TRINITY_DN48603_c0_g1_i1	2620	43.7	83
TRINITY_DN53970_c0_g2_i1	2620	44.2	146
TRINITY_DN47983_c0_g1_i1	2619	36.35	56
TRINITY_DN51870_c1_g1_i1	2617	33.05	155
TRINITY_DN47141_c2_g1_i1	2616	43.2	90
TRINITY_DN53536_c0_g2_i1	2616	41.06	140
TRINITY_DN47379_c6_g1_i1	2615	42.87	11
TRINITY_DN51245_c0_g1_i1	2615	45.77	85
TRINITY_DN57534_c1_g1_i1	2615	45.05	235
TRINITY_DN45131_c0_g1_i1	2614	35.69	15
TRINITY_DN51986_c0_g1_i1	2614	43.42	139
TRINITY_DN58180_c1_g1_i1	2612	45.79	209.5
TRINITY_DN45829_c0_g1_i1	2611	42.01	24
TRINITY_DN47290_c1_g1_i1	2611	45.38	98
TRINITY_DN54057_c0_g1_i1	2611	41.55	13
TRINITY_DN57269_c0_g3_i1	2606	49.04	228
TRINITY_DN45656_c1_g1_i1	2605	35.05	28
TRINITY_DN52026_c0_g1_i1	2603	43.6	130
TRINITY_DN48179_c0_g1_i1	2602	44.2	58
TRINITY_DN52768_c0_g2_i1	2602	44.85	70
TRINITY_DN55668_c0_g1_i1	2602	40.16	382
TRINITY_DN57171_c0_g1_i1	2602	49	167
TRINITY_DN50253_c1_g1_i1	2601	41.1	149
TRINITY_DN41328_c0_g1_i1	2600	41.54	21
TRINITY_DN43767_c0_g1_i1	2600	40.69	84
TRINITY_DN56466_c1_g2_i1	2600	44.85	137
TRINITY_DN44514_c0_g1_i1	2599	43.67	12
TRINITY_DN48975_c0_g1_i1	2599	37.32	23
TRINITY_DN50412_c0_g1_i1	2599	43.98	90
TRINITY_DN47558_c0_g3_i1	2597	38.85	34
TRINITY_DN50921_c0_g1_i1	2596	39.14	142
TRINITY_DN51238_c0_g1_i1	2595	35.41	43
TRINITY_DN47098_c0_g1_i1	2594	42.02	76
TRINITY_DN57744_c0_g1_i1	2594	46.03	276
TRINITY_DN51674_c0_g1_i1	2593	45.2	64
TRINITY_DN46299_c3_g4_i1	2592	38.31	7
TRINITY_DN47726_c0_g1_i1	2592	42.67	184
TRINITY_DN46722_c0_g1_i1	2591	45.74	114
TRINITY_DN50639_c0_g1_i1	2591	44.89	196
TRINITY_DN46866_c0_g1_i1	2590	39.27	52
TRINITY_DN51720_c0_g1_i1	2590	43.86	119
TRINITY_DN52084_c0_g1_i1	2590	46.22	162
TRINITY_DN57570_c1_g3_i1	2590	46.22	96
TRINITY_DN50775_c2_g1_i1	2589	42.8	26
TRINITY_DN46835_c0_g1_i1	2587	43.64	88
TRINITY_DN50599_c0_g1_i1	2585	47.43	261
TRINITY_DN53798_c0_g1_i1	2585	42.67	271
TRINITY_DN53929_c0_g1_i1	2585	39.46	48
TRINITY_DN51905_c0_g1_i1	2584	42.57	258
TRINITY_DN42224_c0_g1_i1	2582	44.89	224
TRINITY_DN54269_c0_g1_i1	2582	42.56	194
TRINITY_DN54732_c0_g1_i1	2581	48.43	278
TRINITY_DN57167_c0_g1_i1	2581	39.95	333
TRINITY_DN55516_c0_g1_i1	2580	51.12	179
TRINITY_DN49613_c0_g2_i1	2578	37.08	68
TRINITY_DN47115_c0_g1_i1	2576	41.15	164
TRINITY_DN58344_c16_g2_i1	2576	43.83	248
TRINITY_DN49207_c0_g1_i1	2575	43.96	38
TRINITY_DN48411_c0_g2_i1	2574	43.98	63
TRINITY_DN52092_c0_g1_i1	2574	44.44	187
TRINITY_DN42694_c0_g1_i1	2573	40.92	78
TRINITY_DN43309_c0_g1_i1	2573	46.17	14
TRINITY_DN43349_c0_g1_i1	2573	46.17	10
TRINITY_DN51420_c0_g1_i1	2573	44.85	199
TRINITY_DN54374_c0_g1_i1	2573	41.24	124
TRINITY_DN50345_c0_g1_i1	2571	40.37	48
TRINITY_DN43626_c0_g1_i1	2570	45.64	10
TRINITY_DN51854_c0_g1_i1	2570	43.81	135
TRINITY_DN53837_c0_g2_i1	2570	46.11	142
TRINITY_DN57695_c1_g1_i1	2570	44.09	69
TRINITY_DN54302_c0_g1_i1	2568	48.13	551
TRINITY_DN50999_c1_g1_i1	2567	40.44	112
TRINITY_DN55385_c0_g2_i1	2566	48.17	227
TRINITY_DN50701_c0_g1_i1	2565	39.26	50
TRINITY_DN51896_c1_g1_i1	2562	42.58	67
TRINITY_DN55758_c0_g1_i1	2562	45.55	78
TRINITY_DN44972_c0_g1_i1	2561	45.1	19
TRINITY_DN58261_c22_g5_i1	2561	48.54	1509
TRINITY_DN46310_c0_g1_i1	2560	50	44
TRINITY_DN49701_c0_g1_i1	2560	37.77	151
TRINITY_DN53818_c0_g1_i1	2560	40.74	311
TRINITY_DN57839_c0_g2_i1	2559	46.15	267
TRINITY_DN48927_c0_g1_i1	2558	35.11	88
TRINITY_DN52016_c0_g1_i1	2557	40.75	48
TRINITY_DN49357_c0_g1_i1	2556	33.06	23
TRINITY_DN48387_c0_g1_i1	2555	38.47	103
TRINITY_DN51723_c0_g1_i1	2555	43.76	185
TRINITY_DN43619_c0_g1_i1	2554	35.08	5
TRINITY_DN48290_c2_g4_i1	2554	41.23	83.5
TRINITY_DN50148_c0_g1_i1	2554	46.01	104
TRINITY_DN49315_c0_g1_i1	2553	39.52	27
TRINITY_DN56356_c1_g1_i1	2552	45.77	402
TRINITY_DN58101_c1_g1_i1	2552	46.2	290.5
TRINITY_DN51388_c0_g2_i1	2550	44.24	205
TRINITY_DN48932_c2_g1_i1	2549	44.06	29
TRINITY_DN49194_c0_g1_i1	2548	42.74	115
TRINITY_DN50016_c2_g1_i1	2548	43.33	134
TRINITY_DN39076_c0_g1_i1	2547	38.83	12
TRINITY_DN46853_c0_g1_i1	2547	42.21	24
TRINITY_DN49060_c0_g1_i1	2547	34.98	12
TRINITY_DN50620_c0_g1_i1	2547	36.79	146
TRINITY_DN54627_c0_g1_i1	2547	42.68	39
TRINITY_DN46296_c0_g1_i1	2546	42.69	24
TRINITY_DN50375_c0_g1_i1	2546	49.92	125
TRINITY_DN50716_c4_g1_i1	2546	44.07	476
TRINITY_DN50971_c1_g1_i1	2545	42.75	191
[truncated: 27,731 more rows]
